# Supplementary material for: International study of definitions of English-language terms for suicidal behaviours: a survey exploring preferred terminology
Source: PubMed Central journal article supplement — BMJ Open. 2021 Feb 9;11(2):e043409. doi: 10.1136/bmjopen-2020-043409 (PMC7875264; doi:10.1136/bmjopen-2020-043409), 2021-02-09

Supplementary Table 1. Number of respondents by country/territory that participated to the International Study of Definitions and Terms for Suicidal Behaviors ©

| Countries/territories | 'experts' | IASP members |
|-----------------------|-----------|--------------|
| Africa                |           |              |
| Ghana                 | 1         | 0            |
| Kenya                 | 1         | 0            |
| Liberia               | 0         | 1            |
| Mauritius             | 1         | 1            |
| Seychelles            | 1         | 0            |
| Uganda                | 1         | 0            |
| America               |           |              |
| Argentina             | 1         | 0            |
| Brazil                | 0         | 4            |
| Canada                | 1         | 5            |
| Colombia              | 1         | 0            |
| Mexico                | 1         | 1            |
| Peru                  | 0         | 1            |
| Puerto Rico           | 1         | 0            |
| The Bahamas           | 0         | 1            |
| Trinidad and Tobago   | 1         | 0            |
| Uruguay               | 1         | 0            |
| USA                   | 1         | 8            |
| Asia                  |           |              |
| Afghanistan           | 1         | 0            |
| Bangladesh            | 0         | 1            |
| Bhutan                | 0         | 1            |
| Cambodia              | 1         | 0            |
| China                 | 1         | 1            |
| Hong Kong             | 1         | 0            |
| India                 | 0         | 2            |
| Iran                  | 1         | 1            |
| Israel                | 0         | 1            |
| Japan                 | 1         | 1            |
| Lebanon               | 1         | 0            |
| Malaysia              | 0         | 1            |
| Nepal                 | 1         | 0            |
| Pakistan              | 1         | 0            |
| Qatar                 | 1         | 0            |
| Singapore             | 0         | 1            |
| Sri Lanka             | 0         | 1            |
| Taiwan                | 0         | 1            |
| Thailand              | 1         | 0            |
| Europe                |           |              |

|                  |    |    |
|------------------|----|----|
| Austria          | 1  | 1  |
| Belgium          | 1  | 1  |
| Denmark          | 1  | 2  |
| Estonia          | 1  | 0  |
| France           | 0  | 2  |
| Germany          | 1  | 1  |
| Greece           | 1  | 0  |
| Hungary          | 1  | 1  |
| Iceland          | 1  | 0  |
| Ireland          | 0  | 3  |
| Italy            | 1  | 1  |
| Lithuania        | 1  | 0  |
| Moldova          | 1  | 0  |
| Netherlands      | 1  | 2  |
| Norway           | 0  | 3  |
| Portugal         | 1  | 1  |
| Romania          | 1  | 0  |
| Slovenia         | 1  | 1  |
| Spain            | 1  | 0  |
| Sweden           | 1  | 1  |
| UK               | 0  | 4  |
| Ukraine          | 1  | 0  |
| Oceania          |    |    |
| Australia        | 1  | 15 |
| New Zealand      | 1  | 6  |
| Cook Islands     | 0  | 1  |
| French Polynesia | 1  | 0  |
| Tonga            | 1  | 0  |
| Total            | 46 | 80 |

Supplementary Figure 1: Participating countries in the International Study of Definitions and Terms of Behavior

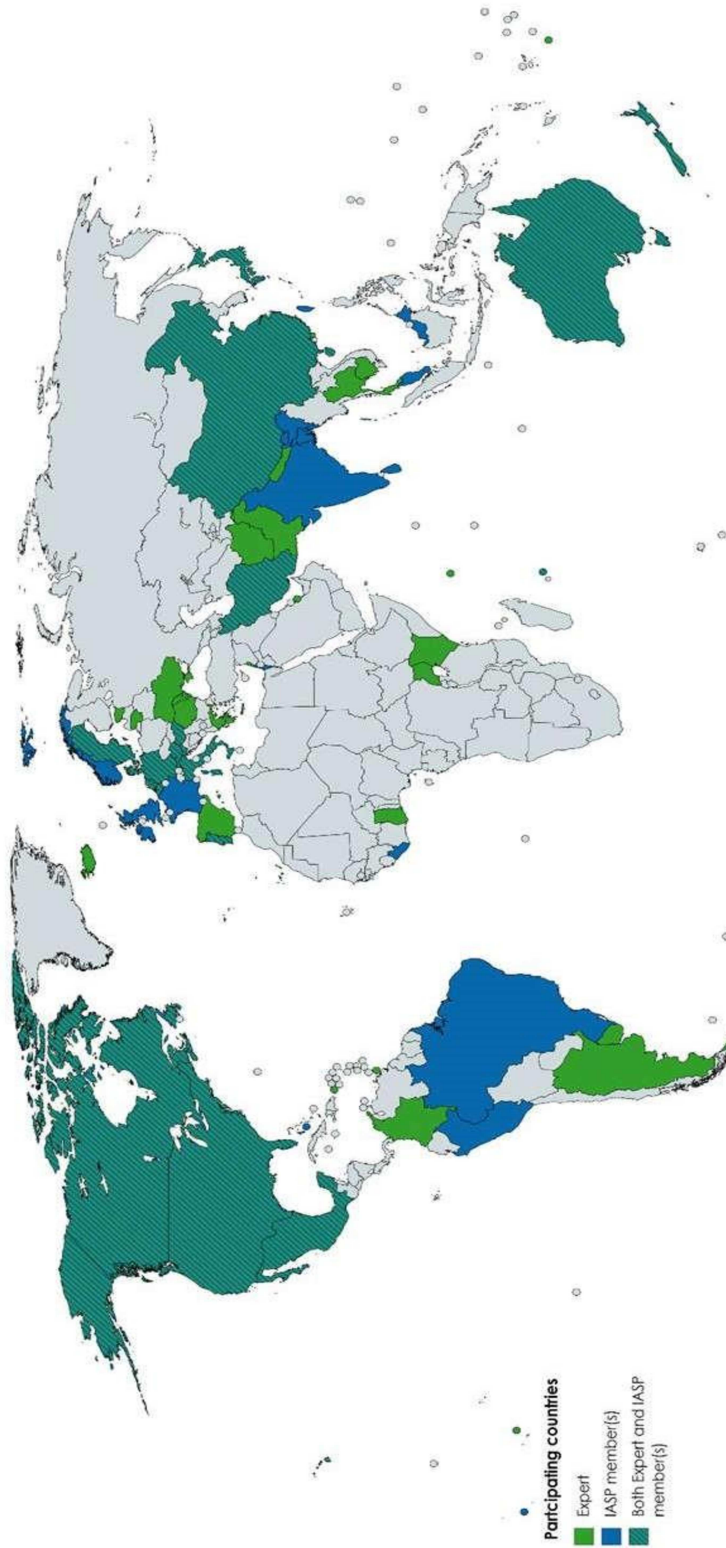

Supplementary Table 2. Individual and country-based results by main components of suicide definition

|                                                                                                                        | Individual based |       | Country based* |       |             |
|------------------------------------------------------------------------------------------------------------------------|------------------|-------|----------------|-------|-------------|
|                                                                                                                        | N                | %     | N              | %     |             |
| <b>Outcome (one item)</b>                                                                                              |                  |       |                |       |             |
| Suicide is an act that necessarily leads to death                                                                      | 102              | 81.6% | 52             | 81.7% |             |
| ... may result in survival                                                                                             | 23               | 18.4% | 11             | 18.2% |             |
| Missing                                                                                                                | 1                |       | 0              |       |             |
| <b>Intent (five separate items)</b>                                                                                    |                  |       |                |       |             |
| Suicide is an act that can only be done with an intent to die                                                          | 59               | 46.8% | 26             | 41.7% |             |
| Suicide is an act that may be done with an intent other than an explicit intent to die                                 | 79               | 62.7% | 44             | 69.4% |             |
| Suicide is an act that may be done with an ambiguous or unclear intent                                                 | 91               | 72.2% | 46             | 73.2% |             |
| Suicide is an act that may be done with an intent to take the risk of dying                                            | 93               | 74.4% | 49             | 77.5% | (missing=1) |
| Suicide is an act that may be done without explicit intent to die                                                      | 68               | 54.0% | 34             | 53.9% |             |
| <b>Knowledge (four separate items)</b>                                                                                 |                  |       |                |       |             |
| Suicide is an act that is necessarily performed with certainty of a fatal result                                       | 44               | 34.9% | 26             | 41.2% |             |
| Suicide is an act that can be performed with the knowledge of a fatal result, but person is not certain of that result | 112              | 88.9% | 55             | 87.1% |             |
| Suicide is an act that can be performed without any knowledge of the consequences of the act                           | 56               | 44.4% | 26             | 41.9% |             |
| Suicide is an act that can be performed with the certainty that the result will not be fatal                           | 27               | 21.4% | 16             | 26.1% |             |
| <b>Agency (one item)</b>                                                                                               |                  |       |                |       |             |
| Suicide is an act that is initiated and necessarily carried out by oneself to the end of the action                    | 75               | 60.0% | 40             | 64.2% |             |
| ... is initiated by oneself, but not necessarily carried out by oneself to the end of the action                       | 32               | 25.6% | 15             | 24.3% |             |
| ... can be initiated and carried out by oneself or by someone else                                                     | 18               | 14.4% | 8              | 12.3% |             |
| Missing                                                                                                                | 1                |       | 1              |       |             |

\*sensitivity analyses (calculated using weights)

Supplementary Table 3. Individual and country-based results of Vignettes

|                                                                                                                                                                                             | Individual based |       | Country based* |       |
|---------------------------------------------------------------------------------------------------------------------------------------------------------------------------------------------|------------------|-------|----------------|-------|
| <b>Vignette 1.</b> In your country, when professionals (e.g. clinicians, researchers) talk about a person harms him- or herself, with the intention to die, and survives, his or her act is |                  |       |                |       |
|                                                                                                                                                                                             | N                | %     | N              | %     |
| A suicide attempt                                                                                                                                                                           | 116              | 92.1% | 57             | 90.9% |
| Parasuicide                                                                                                                                                                                 | 1                | 0.8%  | 1              | 1.6%  |
| Self-harm                                                                                                                                                                                   | 3                | 2.4%  | 2              | 3.7%  |
| Deliberate self-harm                                                                                                                                                                        | 2                | 1.6%  | 1              | 0.9%  |
| Non-fatal suicidal behavior                                                                                                                                                                 | 3                | 2.4%  | 1              | 1.3%  |
| Self-injurious behavior (including self-poisoning/overdosing with medication)                                                                                                               | 1                | 0.8%  | 1              | 1.6%  |
| <b>Vignette 2.</b> (...) when a person harms him- or herself without any intention to die, and survives, his or her act is                                                                  |                  |       |                |       |
|                                                                                                                                                                                             | N                | %     | N              | %     |
| A suicide attempt                                                                                                                                                                           | 17               | 13.5% | 11             | 17.7% |
| Parasuicide                                                                                                                                                                                 | 5                | 4.0%  | 4              | 5.8%  |
| Self-harm                                                                                                                                                                                   | 35               | 27.8% | 19             | 29.6% |
| Deliberate self-harm                                                                                                                                                                        | 22               | 17.5% | 9              | 14.0% |
| Non suicidal self-injury                                                                                                                                                                    | 24               | 19.0% | 8              | 12.2% |
| Self-mutilation                                                                                                                                                                             | 9                | 7.1%  | 4              | 6.9%  |
| Non-fatal suicidal behavior                                                                                                                                                                 | 4                | 3.2%  | 3              | 4.0%  |
| Self-injurious behavior (including self-poisoning/overdosing with medication)                                                                                                               | 10               | 7.9%  | 6              | 9.8%  |
| <b>Vignette 3.</b> (...) when a person harms him- or herself without any intention to die, and dies, his or her act is                                                                      |                  |       |                |       |
|                                                                                                                                                                                             | N                | %     | N              | %     |
| A suicide                                                                                                                                                                                   | 30               | 24.0% | 17             | 26.7% |
| A suicide attempt                                                                                                                                                                           | 7                | 5.6%  | 5              | 7.8%  |
| Parasuicide                                                                                                                                                                                 | 5                | 4.0%  | 3              | 5.1%  |
| Self-harm                                                                                                                                                                                   | 10               | 8.0%  | 5              | 8.4%  |
| Deliberate self-harm                                                                                                                                                                        | 7                | 5.6%  | 3              | 4.8%  |
| Non suicidal self-injury                                                                                                                                                                    | 11               | 8.8%  | 4              | 6.8%  |
| Self-mutilation                                                                                                                                                                             | 3                | 2.4%  | 2              | 2.4%  |
| Fatal suicidal behavior                                                                                                                                                                     | 10               | 8.0%  | 5              | 8.4%  |
| Self-directed violence                                                                                                                                                                      | 1                | 0.8%  | 1              | 1.6%  |
| Self-injurious behavior (including self-poisoning/overdosing with medication)                                                                                                               | 10               | 8.0%  | 3              | 5.4%  |
| An accident                                                                                                                                                                                 | 22               | 17.6% | 11             | 17.5% |
| An undetermined death (open verdict)                                                                                                                                                        | 9                | 7.2%  | 3              | 4.8%  |
| Missing                                                                                                                                                                                     | 1                |       | 0              |       |
| <b>Vignette 4.</b> (...) when a person harms him- or herself, but, for whatever reasons, cannot state his or her intentions and the person survives, his or her act is                      |                  |       |                |       |
|                                                                                                                                                                                             | N                | %     | N              | %     |
| A suicide attempt                                                                                                                                                                           | 31               | 25.0% | 20             | 32.2% |
| Parasuicide                                                                                                                                                                                 | 7                | 5.6%  | 4              | 7.1%  |
| Self-harm                                                                                                                                                                                   | 23               | 18.5% | 9              | 15.3% |
| Deliberate self-harm                                                                                                                                                                        | 18               | 14.5% | 8              | 13.4% |
| Non suicidal self-injury                                                                                                                                                                    | 8                | 6.5%  | 3              | 5.3%  |
| Self mutilation                                                                                                                                                                             | 2                | 1.6%  | 1              | 2.2%  |
| Non-fatal suicidal behavior                                                                                                                                                                 | 3                | 2.4%  | 1              | 1.4%  |
| Self-directed violence                                                                                                                                                                      | 3                | 2.4%  | 1              | 1.8%  |

|                                                                               |    |       |   |      |
|-------------------------------------------------------------------------------|----|-------|---|------|
| Self-injurious behavior (including self-poisoning/overdosing with medication) | 15 | 12.1% | 6 | 9.6% |
| An accident                                                                   | 3  | 2.4%  | 3 | 4.8% |
| An undetermined event                                                         | 11 | 8.9%  | 4 | 6.8% |
| Missing                                                                       | 2  |       | 1 |      |

**Vignette 5.** (...) when a person harms him- or herself, but does not want to state his or her intentions and the person survives, his or her act is

|                                                                               | N  | %     | N  | %     |
|-------------------------------------------------------------------------------|----|-------|----|-------|
| A suicide attempt                                                             | 34 | 27.4% | 21 | 34.3% |
| Parasuicide                                                                   | 5  | 4.0%  | 3  | 4.8%  |
| Self-harm                                                                     | 28 | 22.6% | 12 | 19.1% |
| Deliberate self-harm                                                          | 25 | 20.2% | 12 | 19.9% |
| Non suicidal self-injury                                                      | 5  | 4.0%  | 2  | 3.6%  |
| Non-fatal suicidal behavior                                                   | 1  | 0.8%  | 0  | 0.1%  |
| Self-directed violence                                                        | 2  | 1.6%  | 1  | 1.6%  |
| Self-injurious behavior (including self-poisoning/overdosing with medication) | 11 | 8.9%  | 4  | 5.9%  |
| An accident                                                                   | 3  | 2.4%  | 3  | 4.8%  |
| An undetermined event                                                         | 10 | 8.1%  | 4  | 5.7%  |
| Missing                                                                       | 2  |       | 1  |       |

**Vignette 6.** (...) when a person dies as a consequence of harming him or herself, but his or her intentions in doing so cannot be known or inferred, his or her act is

|                                                                               | N  | %     | N  | %     |
|-------------------------------------------------------------------------------|----|-------|----|-------|
| A suicide                                                                     | 53 | 42.1% | 33 | 52.3% |
| A suicide attempt                                                             | 3  | 2.4%  | 2  | 3.3%  |
| Parasuicide                                                                   | 2  | 1.6%  | 2  | 3.2%  |
| Self-harm                                                                     | 6  | 4.8%  | 3  | 4.3%  |
| Deliberate self-harm                                                          | 5  | 4.0%  | 3  | 4.3%  |
| Non-fatal suicidal behavior                                                   | 1  | 0.8%  | 1  | 1.6%  |
| Self-directed violence                                                        | 1  | 0.8%  | 1  | 0.8%  |
| Self-injurious behavior (including self-poisoning/overdosing with medication) | 7  | 5.6%  | 2  | 2.7%  |
| An accident                                                                   | 8  | 6.3%  | 4  | 6.2%  |
| An undetermined death (open verdict)                                          | 40 | 31.7% | 13 | 21.4% |

**Vignette 7.** (...) when someone who occasionally thinks of suicide when confronted to distress, this person has

|                              | N  | %     | N  | %     |
|------------------------------|----|-------|----|-------|
| A normal pattern of thinking | 16 | 12.8% | 8  | 12.8% |
| Suicidal ideation            | 81 | 64.8% | 40 | 63.0% |
| Passive suicidal ideation    | 6  | 4.8%  | 4  | 5.7%  |
| Active suicidal ideation     | 1  | 0.8%  | 0  | 0.1%  |
| Death wishes                 | 7  | 5.6%  | 5  | 7.8%  |
| Reactive suicide ideation    | 14 | 11.2% | 6  | 10.2% |
| Missing                      | 1  |       | 0  |       |

**Vignette 8.** (...) when someone who continuously thinks of suicide but has no suicidal intent, this person has

|                              | N  | %     | N  | %     |
|------------------------------|----|-------|----|-------|
| A normal pattern of thinking | 2  | 1.6%  | 1  | 1.6%  |
| Suicidal ideation            | 57 | 45.2% | 29 | 46.2% |
| Passive suicidal ideation    | 12 | 9.5%  | 7  | 11.6% |
| Active suicidal ideation     | 10 | 7.9%  | 6  | 9.1%  |
| Persistent suicide ideation  | 39 | 31.0% | 15 | 24.1% |
| Death wishes                 | 6  | 4.8%  | 5  | 7.4%  |

**Vignette 9.** (...) when someone who hopes for death but has no thoughts of killing him- or herself, this person has

|                              | N  | %     | N  | %     |
|------------------------------|----|-------|----|-------|
| A normal pattern of thinking | 6  | 4.8%  | 4  | 5.8%  |
| Suicidal ideation            | 18 | 14.4% | 7  | 11.6% |
| Passive suicidal ideation    | 29 | 23.2% | 15 | 23.1% |
| Death wishes                 | 72 | 57.6% | 37 | 59.3% |
| Missing                      | 1  |       | 0  |       |

**Vignette 10.** (...) when someone hopes for death by killing him- or herself, this person has

|                              | N  | %     | N  | %     |
|------------------------------|----|-------|----|-------|
| A normal pattern of thinking | 1  | 0.8%  | 1  | 1.6%  |
| Suicidal ideation            | 77 | 61.6% | 37 | 59.0% |
| Passive suicidal ideation    | 4  | 3.2%  | 2  | 2.5%  |
| Active suicidal ideation     | 40 | 32.0% | 21 | 33.4% |
| Death wishes                 | 3  | 2.4%  | 2  | 3.4%  |
| Missing                      | 1  |       | 0  |       |

**Vignette 11.** (...) when someone states suicidal intention without engaging in behavior, this person

|                                              | N  | %     | N  | %     |
|----------------------------------------------|----|-------|----|-------|
| Is engaging in suicidal behavior             | 4  | 3.3%  | 2  | 2.6%  |
| Is experiencing suicidal ideation            | 70 | 56.9% | 32 | 52.2% |
| Is experiencing passive suicidal ideation    | 7  | 5.7%  | 2  | 3.6%  |
| Is experiencing active suicidal ideation     | 11 | 8.9%  | 6  | 9.9%  |
| Has made a suicide attempt                   | 1  | 0.8%  | 1  | 1.6%  |
| Has made a suicide threat                    | 10 | 8.1%  | 6  | 10.3% |
| Has made a suicide communication             | 14 | 11.4% | 8  | 12.5% |
| Has made a suicide plan                      | 2  | 1.6%  | 1  | 2.0%  |
| Is engaging in preparatory suicidal behavior | 3  | 2.4%  | 2  | 3.6%  |
| Has made an aborted suicide attempt          | 1  | 0.8%  | 1  | 1.6%  |
| Missing                                      | 3  |       | 2  |       |

**Vignette 12.** (...) when someone mimics (i.e. acts in a way that has the appearance of) suicidal behavior without sustaining any injuries, this person

|                                              | N  | %     | N  | %     |
|----------------------------------------------|----|-------|----|-------|
| Is engaging in suicidal behavior             | 42 | 35.6% | 18 | 30.2% |
| Is experiencing suicidal ideation            | 10 | 8.5%  | 3  | 5.7%  |
| Is experiencing passive suicidal ideation    | 4  | 3.4%  | 2  | 2.9%  |
| Is experiencing active suicidal ideation     | 6  | 5.1%  | 5  | 8.6%  |
| Has made a suicide attempt                   | 9  | 7.6%  | 5  | 7.9%  |
| Has made a suicide threat                    | 23 | 19.5% | 15 | 25.8% |
| Has made a suicide communication             | 10 | 8.5%  | 3  | 5.9%  |
| Has made a suicide plan                      | 3  | 2.5%  | 2  | 3.4%  |
| Is engaging in preparatory suicidal behavior | 8  | 6.8%  | 4  | 6.3%  |
| Has made an aborted suicide attempt          | 3  | 2.5%  | 2  | 2.6%  |
| Missing                                      | 8  |       | 5  |       |

**Vignette 13.** (...) when someone has decided how and when to perform a suicidal act, but does not actively prepare anything, this person

|                                           | N  | %    | N | %     |
|-------------------------------------------|----|------|---|-------|
| Is engaging in suicidal behavior          | 7  | 5.7% | 4 | 6.3%  |
| Is experiencing suicidal ideation         | 11 | 8.9% | 4 | 7.2%  |
| Is experiencing passive suicidal ideation | 1  | 0.8% | 0 | 0.1%  |
| Is experiencing active suicidal ideation  | 12 | 9.8% | 6 | 10.6% |
| Has made a suicide threat                 | 2  | 1.6% | 1 | 2.2%  |
| Has made a suicide communication          | 2  | 1.6% | 1 | 2.0%  |

|                                              |    |       |    |       |
|----------------------------------------------|----|-------|----|-------|
| Has made a suicide plan                      | 83 | 67.5% | 40 | 65.2% |
| Is engaging in preparatory suicidal behavior | 4  | 3.3%  | 3  | 4.6%  |
| Has made an interrupted suicide attempt      | 1  | 0.8%  | 1  | 1.6%  |
| Missing                                      | 3  |       | 2  |       |

**Vignette 14.** (...) when someone prepares a suicidal act (e.g. assembles pills, buys a gun, attaches a rope, visits a bridge), but does not initiate it and thus does not sustain any injuries, this person

|                                              | N  | %     | N  | %     |
|----------------------------------------------|----|-------|----|-------|
| Is engaging in suicidal behavior             | 8  | 6.6%  | 4  | 6.1%  |
| Is experiencing suicidal ideation            | 5  | 4.1%  | 3  | 4.7%  |
| Is experiencing active suicidal ideation     | 7  | 5.7%  | 4  | 5.8%  |
| Has made a suicide attempt                   | 3  | 2.5%  | 3  | 5.0%  |
| Has made a suicide threat                    | 3  | 2.5%  | 2  | 3.3%  |
| Has made a suicide communication             | 1  | 0.8%  | 1  | 0.8%  |
| Has made a suicide plan                      | 42 | 34.4% | 20 | 33.8% |
| Is engaging in preparatory suicidal behavior | 52 | 42.6% | 24 | 39.8% |
| Has made an interrupted suicide attempt      | 1  | 0.8%  | 1  | 0.8%  |
| Missing                                      | 4  |       | 3  |       |

**Vignette 15.** (...) when someone initiates a suicidal act (e.g. stands or sits on the edge of a high bridge, ties a rope around his or her neck), but stops him or herself before sustaining any injuries, this person

|                                              | N  | %     | N  | %     |
|----------------------------------------------|----|-------|----|-------|
| Is engaging in suicidal behavior             | 17 | 14.0% | 6  | 9.9%  |
| Is experiencing suicidal ideation            | 1  | 0.8%  | 0  | 0.6%  |
| Is experiencing active suicidal ideation     | 2  | 1.7%  | 2  | 3.3%  |
| Has made a suicide attempt                   | 23 | 19.0% | 16 | 26.2% |
| Has made a suicide threat                    | 6  | 5.0%  | 3  | 5.1%  |
| Has made a suicide communication             | 1  | 0.8%  | 0  | 0.4%  |
| Has made a suicide plan                      | 2  | 1.7%  | 2  | 3.3%  |
| Is engaging in preparatory suicidal behavior | 8  | 6.6%  | 3  | 5.7%  |
| Has made an interrupted suicide attempt      | 21 | 17.4% | 10 | 16.0% |
| Has made an aborted suicide attempt          | 40 | 33.1% | 18 | 29.7% |
| Missing                                      | 5  |       | 3  |       |

**Vignette 16.** (...) when someone initiates a suicidal act (e.g. stands or sits on the edge of a high bridge, ties a rope around his or her neck), but is stopped by someone else before sustaining any injuries, this person

|                                          | N  | %     | N  | %     |
|------------------------------------------|----|-------|----|-------|
| Is engaging in suicidal behavior         | 7  | 5.8%  | 4  | 6.4%  |
| Is experiencing suicidal ideation        | 1  | 0.8%  | 0  | 0.6%  |
| Is experiencing active suicidal ideation | 1  | 0.8%  | 1  | 1.7%  |
| Has made a suicide attempt               | 33 | 27.3% | 19 | 32.2% |
| Has made a suicide communication         | 1  | 0.8%  | 1  | 1.7%  |
| Has made a suicide plan                  | 1  | 0.8%  | 0  | 0.4%  |
| Has made an interrupted suicide attempt  | 71 | 58.7% | 31 | 51.2% |
| Has made an aborted suicide attempt      | 6  | 5.0%  | 4  | 6.1%  |
| Missing                                  | 5  |       | 3  |       |

\*sensitivity analyses (calculated using weights)



Supplementary Figure 2. Percentage of respondents who agreed with statements regarding the definition of suicide according to national income in the ISDELTSB sample (HIC=High Income Country; LMIC=Low- and Middle-Income Country)

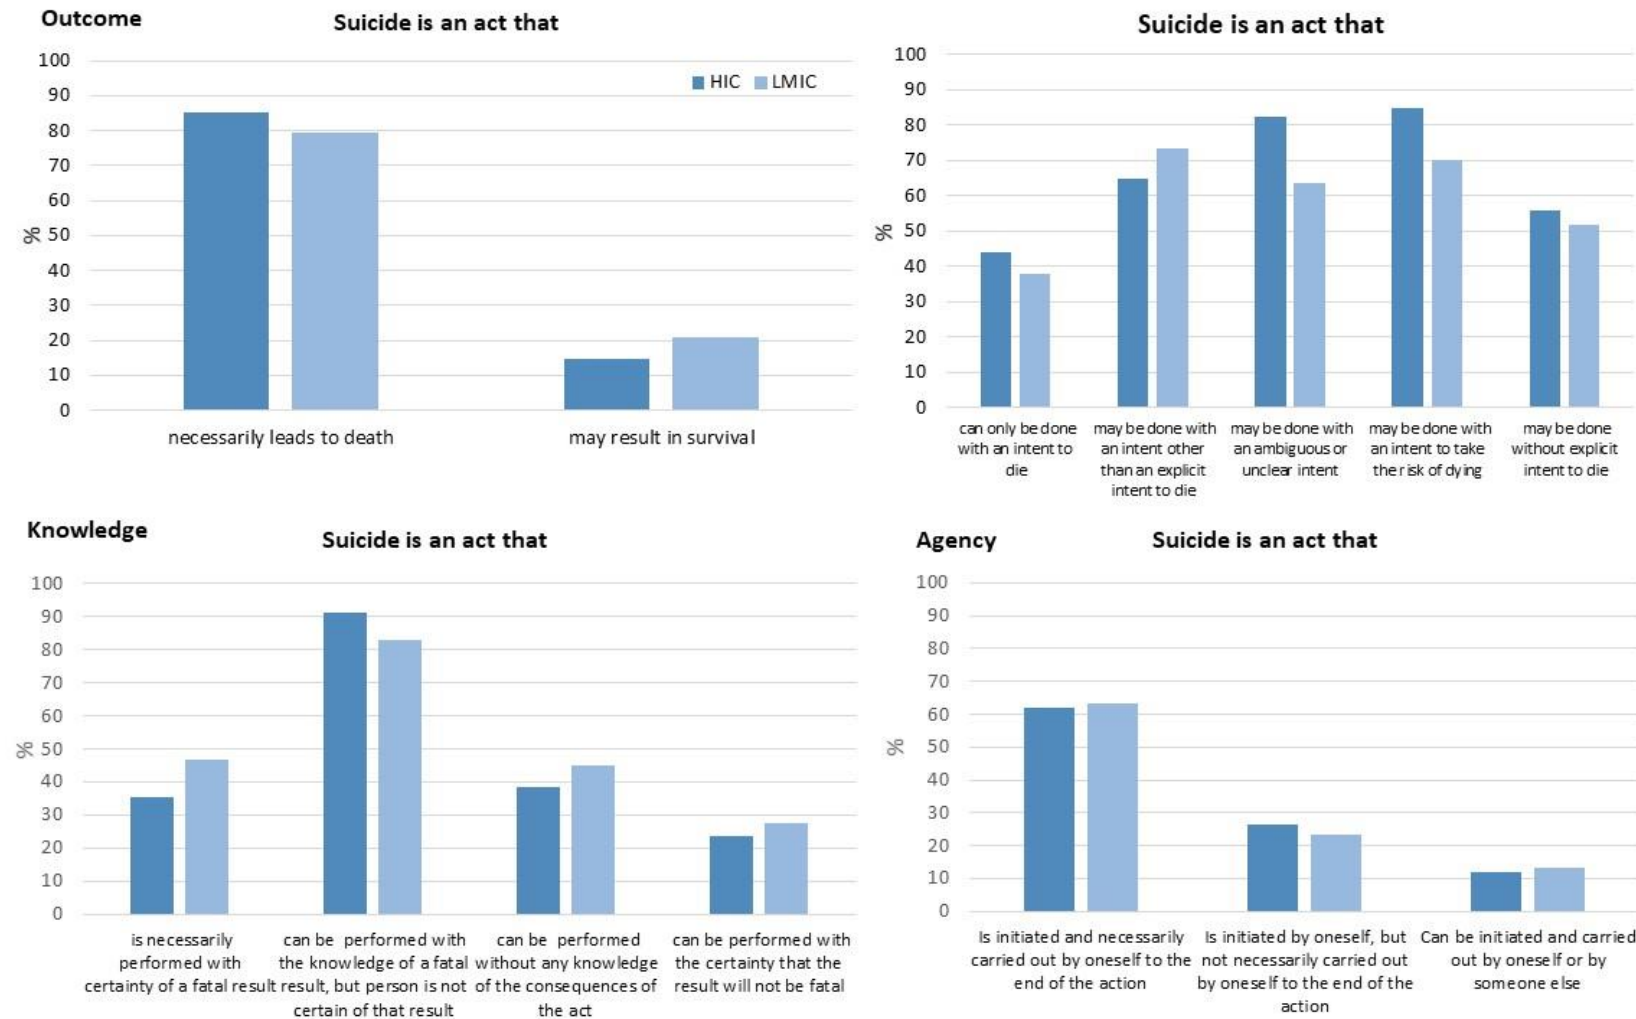

Supplementary Figure 3. Percentage of respondents agreeing to statements regarding the definition of suicidal behaviours (Vignettes 1-8) by national income in ISDTSB sample (HIC=High Income Country; LMIC=Low- and Middle-Income Country)

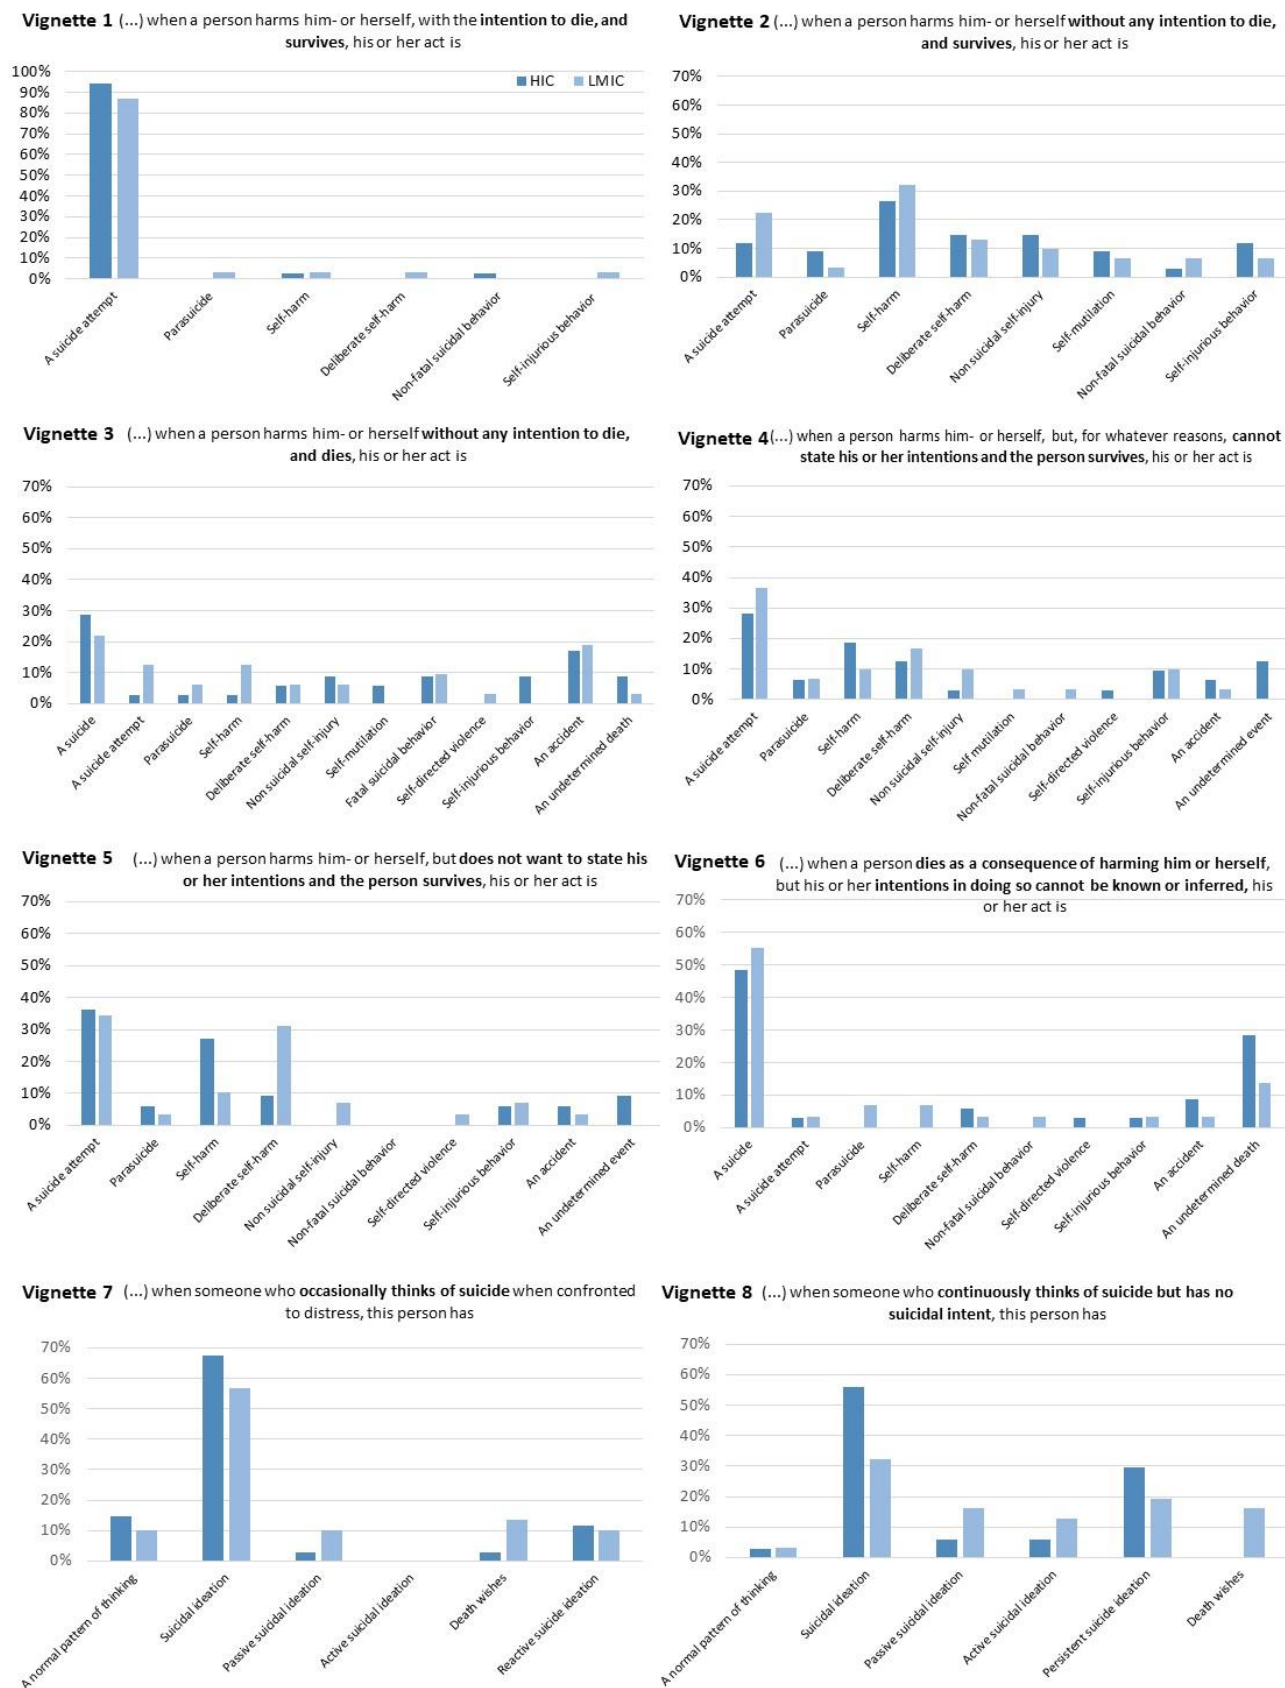

Supplementary Figure 4. Percentage of respondents agreeing to statements regarding the definition of suicidal behaviours (Vignettes 9-16) by national income in ISDTSB sample (HIC=High Income Country; LMIC=Low- and Middle-Income Country)

**Vignette 9** (...) when someone who hopes for death but has no thoughts of killing him- or herself, this person has

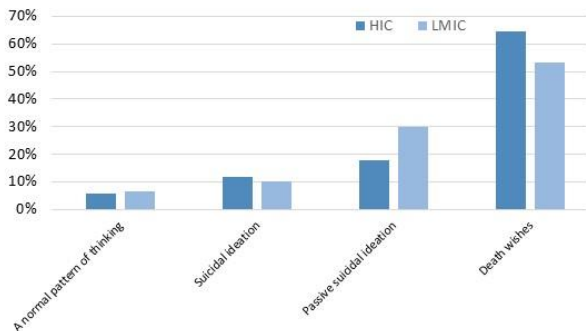

**Vignette 10** (...) when someone hopes for death by killing him- or herself, this person has

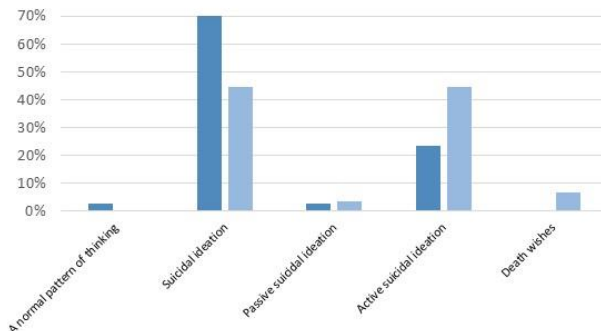

**Vignette 11** (...) when someone states suicidal intention without engaging in behavior, this person

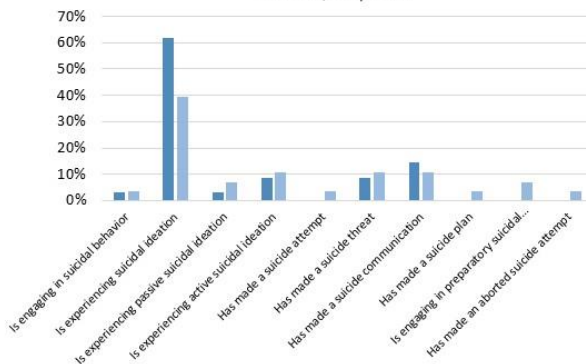

**Vignette 12** (...) when someone mimics (i.e. acts in a way that has the appearance of) suicidal behavior without sustaining any injuries, this person

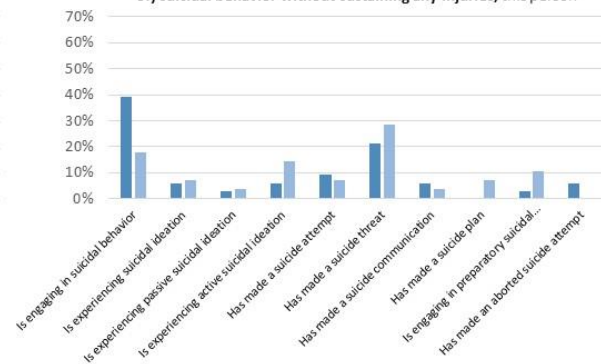

**Vignette 13** (...) when someone has decided how and when to perform a suicidal act, but does not actively prepare anything, this person

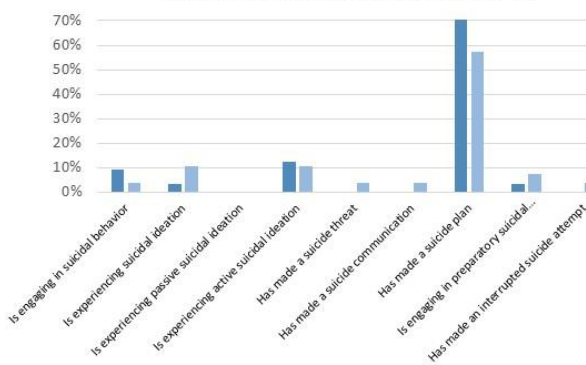

**Vignette 14** (...) when someone prepares a suicidal act (e.g. assembles pills, buys a gun, attaches a rope, visits a bridge), but does not initiate it and thus does not sustain any injuries, this person

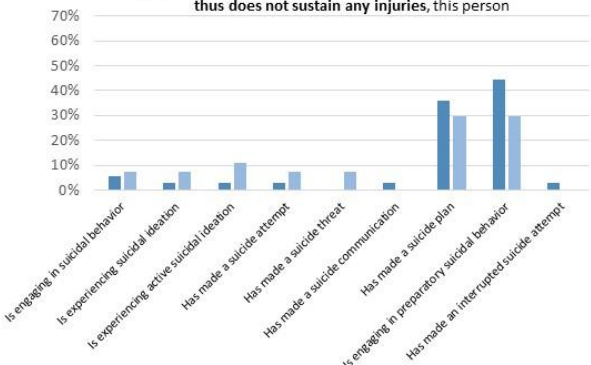

**Vignette 15** (...) when someone initiates a suicidal act (e.g. stands or sits on the edge of a high bridge, ties a rope around his or her neck), but stops him or herself before sustaining any injuries, this person

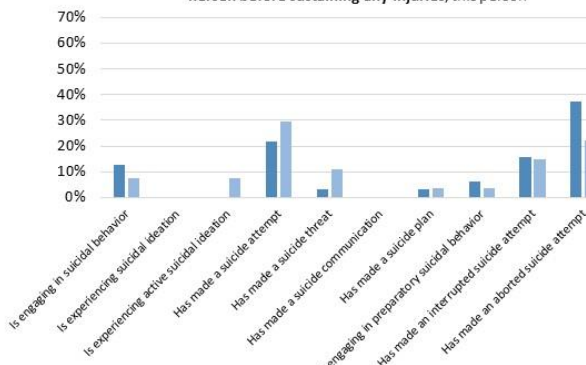

**Vignette 16** (...) when someone initiates a suicidal act (e.g. stands or sits on the edge of a high bridge, ties a rope around his or her neck), but is stopped by someone else before sustaining any injuries, this person

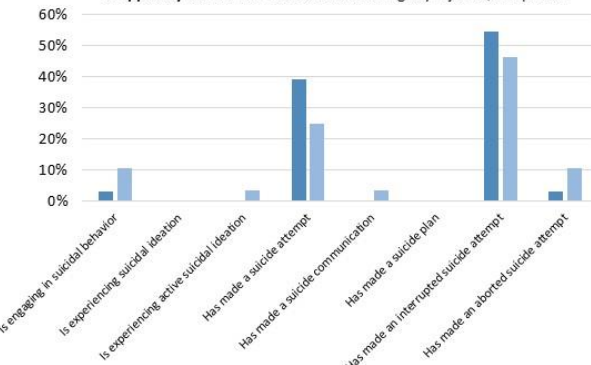

Supplement: bmjopen-2020-043409supp001.pdf [file bmjopen-2020-043409supp001.pdf]
