# Supplementary material for: International study of definitions of English-language terms for suicidal behaviours: a survey exploring preferred terminology
Source: PubMed Central journal article supplement — BMJ Open. 2021 Feb 9;11(2):e043409. doi: 10.1136/bmjopen-2020-043409 (PMC7875264; doi:10.1136/bmjopen-2020-043409), 2021-02-09
Supplement: bmjopen-2020-043409.draft_revisions.pdf [file bmjopen-2020-043409.draft_revisions.pdf]

# BMJ Open

BMJ Open is committed to open peer review. As part of this commitment we make the peer review history of every article we publish publicly available.

When an article is published we post the peer reviewers' comments and the authors' responses online. We also post the versions of the paper that were used during peer review. These are the versions that the peer review comments apply to.

The versions of the paper that follow are the versions that were submitted during the peer review process. They are not the versions of record or the final published versions. They should not be cited or distributed as the published version of this manuscript.

BMJ Open is an open access journal and the full, final, typeset and author-corrected version of record of the manuscript is available on our site with no access controls, subscription charges or pay-per-view fees (<http://bmjopen.bmj.com>).

If you have any questions on BMJ Open's open peer review process please email [info.bmjopen@bmj.com](mailto:info.bmjopen@bmj.com)

# BMJ Open

## International Study of Definitions of English-Language Terms for Suicidal Behaviors ©: Study Results

|                               |                                                                                                                                                                                                                                                                                                                                                                                                                                                                                                                                                                                                                                                                                                                                                                                                                                                                                                                                                                                                                                                            |
|-------------------------------|------------------------------------------------------------------------------------------------------------------------------------------------------------------------------------------------------------------------------------------------------------------------------------------------------------------------------------------------------------------------------------------------------------------------------------------------------------------------------------------------------------------------------------------------------------------------------------------------------------------------------------------------------------------------------------------------------------------------------------------------------------------------------------------------------------------------------------------------------------------------------------------------------------------------------------------------------------------------------------------------------------------------------------------------------------|
| Journal:                      | <i>BMJ Open</i>                                                                                                                                                                                                                                                                                                                                                                                                                                                                                                                                                                                                                                                                                                                                                                                                                                                                                                                                                                                                                                            |
| Manuscript ID                 | bmjopen-2020-043409                                                                                                                                                                                                                                                                                                                                                                                                                                                                                                                                                                                                                                                                                                                                                                                                                                                                                                                                                                                                                                        |
| Article Type:                 | Original research                                                                                                                                                                                                                                                                                                                                                                                                                                                                                                                                                                                                                                                                                                                                                                                                                                                                                                                                                                                                                                          |
| Date Submitted by the Author: | 02-Aug-2020                                                                                                                                                                                                                                                                                                                                                                                                                                                                                                                                                                                                                                                                                                                                                                                                                                                                                                                                                                                                                                                |
| Complete List of Authors:     | De Leo, Diego; Griffith University, Goodfellow, Benjamin; Australian Institute of Suicide Research and Prevention, ; centre hospitalier albert bousquet, psychiatrie générale Kolves, Kairi; Griffith University, AISRAP Silverman, Morton; Medical College of Wisconsin Berman, Alan; Johns Hopkins School of Medicine, Department of Psychiatry and Behavioral Sciences Mann, John; Columbia University Arensman , Ella ; National Suicide Research Foundation, School of Public Health Hawton, Keith; Centre for Suicide Research, Oxford University, Psychiatry Phillips, M. R.; Shanghai Jiao Tong University, Shanghai Mental Health Center; Columbia University, Departments of Psychiatry and Epidemiology Vijayakumar , Lakshmi ; Voluntary Health Services, Department of Psychiatry; Dr Andriessen, Karl; The University of Melbourne, Centre for Mental Health, Melbourne School of Population and Global Health Chavez-Hernandez, Ana-Maria; University of Guanajuato Heisel, Marnin; University of Western Ontario, Department of Psychiatry |
| Keywords:                     | Suicide & self-harm < PSYCHIATRY, EPIDEMIOLOGY, MENTAL HEALTH                                                                                                                                                                                                                                                                                                                                                                                                                                                                                                                                                                                                                                                                                                                                                                                                                                                                                                                                                                                              |
|                               |                                                                                                                                                                                                                                                                                                                                                                                                                                                                                                                                                                                                                                                                                                                                                                                                                                                                                                                                                                                                                                                            |

SCHOLARONE™  
Manuscripts

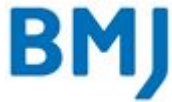

I, the Submitting Author has the right to grant and does grant on behalf of all authors of the Work (as defined in the below author licence), an exclusive licence and/or a non-exclusive licence for contributions from authors who are: i) UK Crown employees; ii) where BMJ has agreed a CC-BY licence shall apply, and/or iii) in accordance with the terms applicable for US Federal Government officers or employees acting as part of their official duties; on a worldwide, perpetual, irrevocable, royalty-free basis to BMJ Publishing Group Ltd ("BMJ") its licensees and where the relevant Journal is co-owned by BMJ to the co-owners of the Journal, to publish the Work in this journal and any other BMJ products and to exploit all rights, as set out in our [licence](#).

The Submitting Author accepts and understands that any supply made under these terms is made by BMJ to the Submitting Author unless you are acting as an employee on behalf of your employer or a postgraduate student of an affiliated institution which is paying any applicable article publishing charge ("APC") for Open Access articles. Where the Submitting Author wishes to make the Work available on an Open Access basis (and intends to pay the relevant APC), the terms of reuse of such Open Access shall be governed by a Creative Commons licence – details of these licences and which [Creative Commons](#) licence will apply to this Work are set out in our licence referred to above.

Other than as permitted in any relevant BMJ Author's Self Archiving Policies, I confirm this Work has not been accepted for publication elsewhere, is not being considered for publication elsewhere and does not duplicate material already published. I confirm all authors consent to publication of this Work and authorise the granting of this licence.

# International Study of Definitions of English-Language Terms for Suicidal Behaviors ©: Study Results

Diego De Leo<sup>1</sup>, Benjamin Goodfellow<sup>1,2</sup>, Kairi Kölves<sup>1</sup>, Morton M. Silverman<sup>3</sup>, Alan Berman<sup>4</sup>, J. John Mann<sup>5</sup>, Ella Arensman<sup>6</sup>, Keith Hawton<sup>7</sup>, Michael Phillips<sup>8</sup>, Lakshmi Vijayakumar<sup>9</sup>, Karl Andriessen<sup>10</sup>, Ana-Maria Chavez-Hernandez<sup>11</sup>, Marnin Heisel<sup>12</sup>

1 Australian Institute of Suicide Research and Prevention, World Health Organization Collaborating Centre for Research in Suicide Prevention and Training, Griffith University, Mt Gravatt, Queensland, Australia

2 Centre Hospitalier Albert Bousquet, Nouméa, New Caledonia

3 Medical College of Wisconsin, Milwaukee, Wisconsin, USA

4 Department of Psychiatry and Behavioral Sciences, Johns Hopkins School of Medicine, Baltimore, MD, USA

5 Departments of Psychiatry and Radiology, Columbia University, New York, USA

6 National Suicide Research Foundation & School of Public Health, University College Cork, Cork, Ireland

7 Centre for Suicide Research, University of Oxford, United Kingdom

8 Suicide Research and Prevention Center, Shanghai Mental Health Center, Shanghai, China

9 Department of Psychiatry, Voluntary Health Services, Chennai, India

10 Centre for Mental Health, School of Population and Global Health, University of Melbourne, Melbourne, Victoria, Australia

11 Department of Psychology, University of Guanajuato, Guanajuato, Mexico

12 Department of Psychiatry, The University of Western Ontario, London, Ontario, Canada; University of Rochester Center for the Study and Prevention of Suicide, Rochester, New York, USA

Corresponding author:

Professor Diego de Leo

Australian Institute of Suicide Research and Prevention, World Health Organization Collaborating Centre for Research in Suicide Prevention and Training, Griffith University, Mt Gravatt, Australia.

Phone: +6137353380

E-mail: d.deleo@griffith.edu.au

## Abstract

**Objectives:** Explore avenues to achieve international consensus on nomenclatures of suicidal behaviours.

**Design:** An online survey.

**Setting:** International.

**Participants:** Sample consisted of 126 participants from 63 countries (or territories) including 40 IASP national representatives and 80 IASP regular members. Three more countries were identified – respectively - by two people designated by the WPA and one by the WONCA. Another three participants were eventually identified by the staff of Australian Institute for Suicide Research and Prevention's (AISRAP). Thirty of the participating countries or territories were LMICs, represented by 37 individuals. The thirty-three other countries were HICs, represented by 89 individuals.

**Primary and secondary outcome measures:** Definitions of English-language terms for suicidal behaviours.

**Results:** The definition of 'suicide' resulting from the present survey evidenced a preference for involving an act initiated and carried out by the actor itself. The definition of 'suicide attempt' resulted most often restricted to acts with intent to die, whereas 'self-harm' more broadly referred to acts with varying motives, including the wish to die. The meaning of 'suicidal ideation', 'death wishes', and 'suicide plan' was shared almost universally among respondents. 'Aborted' and 'interrupted suicide attempt' were not meant to be included in the definition of 'preparatory suicidal behaviour'. There were a number of differences between representatives from HICs and LMICs.

**Conclusion:** This international opinion survey provided the basis for a tentative nomenclature of suicidal behaviour shared trans-culturally. Future developments of this nomenclature should be tested in larger samples of professionals, with particular attention to intercultural and interdisciplinary representativeness for which the involvement of LMICs may be a challenge.

1  
2  
3 **'Strengths and limitations of this study'**  
4

5 This study is the first attempt to assemble opinions from a wide range of countries and professional  
6 backgrounds on the subject of definitions of suicidal behaviours. The main limitations are the relatively  
7 low participation rate and the fact that it was restricted to the English language.  
8  
9

10  
11  
12 **Key words:** definition, terminology, nomenclature, classification, suicide, suicidal behaviour  
13  
14  
15  
16  
17  
18  
19  
20  
21  
22  
23  
24  
25  
26  
27  
28  
29  
30  
31  
32  
33  
34  
35  
36  
37  
38  
39  
40  
41  
42  
43  
44  
45  
46  
47  
48  
49  
50  
51  
52  
53  
54  
55  
56  
57  
58  
59  
60

For peer review only

## Introduction

According to official mortality statistics, 793,000 people worldwide died by suicide in 2016; 79% of these cases were from low-and-middle-income (LMIC) countries,<sup>1</sup> whilst most research outputs on suicidal behaviour are produced in high-income countries (HIC).

One important limitation to the generalization of suicide research outputs is the absence of international consensus on terminologies and definitions, making it difficult to compare interpretations and categories of suicidal behaviour among studies originating in different parts of the world. For this reason, the International Association for Suicide Prevention (IASP) has constituted a Special Interest Group for the development of an internationally applicable nomenclature of suicidal behaviours.<sup>2</sup>

This article presents the results of the International Study of Definitions of English-Language Terms for Suicidal Behaviors (ISDELTSB), which aimed to assemble a minimum set of commonly understood and widely used terms and definitions to describe suicidal phenomena. The study was based on a survey of people with knowledge of suicide topics from different nations, including a number of non-English speaking countries.<sup>3</sup> As discussed elsewhere,<sup>4</sup> most definitions and terms of common use originate from HIC. However, since LMICs are increasingly producing research efforts, it would be important to obtain a clearer picture of the definitions and terms used around the world.

Thus, the aim of the study was to identify possible areas of consensus among international health professionals, compare the differences between the LMICs and HICs, and discuss opportunities for improving standardized use of English-language terms.

## Methodology

The ISDELTSA methodology was based on a survey of members of international organisations having interest in the study and prevention of suicide, namely the IASP, the World Psychiatric Association (WPA), and the World Organization of National Colleges, Academies and Academic Associations of General Practitioners/Family Physicians' (WONCA), with an effort to recruit from the widest possible range of countries. An initial sample was built with one representative per country.<sup>3</sup> These individuals were expected to provide answers that were representative of the views of professionals working in their country. However, the initial call to national delegates of IASP and members of the other associations resulted in a small number of recruits. It was therefore decided to widen the study sample by inviting all IASP members to participate, assuming that their interest in suicide prevention could be paralleled by a degree of knowledge in the field of suicide higher than that of lay people. Consequently, each participating country had either one 'expert' (i.e. an IASP national representative, or a member of WPA or WONCA), or at least one IASP member. All procedures were approved by the Griffith University's Human Research Ethics Committee (2017/601).

The survey questionnaire proposed a variety of terms and definitions commonly found in the literature. Details about the questionnaire are available in an open access journal.<sup>3</sup>

## *Sample characteristics*

Data was collected in 2018. Initially, participants comprised only IASP national representatives; among the 62 existing national delegates of the association, 40 agreed to join the study. Three more countries were identified – respectively - by two people designated by the WPA and one by the WONCA. Another three participants were eventually identified by the staff of Australian Institute for Suicide Research and Prevention's (AISRAP) among those countries with no IASP delegate. In this way, representatives from 46 countries took part to the study. To further increase the number of participants, invitation to



1  
2  
3 join the study was extended to all members of IASP. Out of 408 IASP regular members (excluding  
4 national delegates), 80 agreed to take part in the study, bringing to 126 the final number of participants  
5  
6 (80 'new' participants plus the 46 previously recruited). With this operation, the number of countries  
7  
8 with at least one representative rose to 63 (countries or territories). The list and the map of  
9  
10 participating countries are available in Supplementary Tables 1 and 2.  
11  
12  
13  
14

15 Thirty of the participating countries or territories were LMICs represented by 37 individuals. The thirty-  
16  
17 three other countries were HICs represented by 89 individuals. English language was spoken in 23 out  
18  
19 of 63 countries. Sixty-one participants were from a country in which no English is spoken, whilst 65  
20  
21 participants were from a country in which English is the official language or one of the official  
22  
23 languages. Concerning professional background of participants, 30% were medical doctors, 29% were  
24  
25 psychologists, 10% were epidemiologists, and 31% were from 'other' professions (e.g., social worker,  
26  
27 student, sociologist, public health professional, teacher etc).  
28  
29  
30

31 Statistical analyses were performed using IBM SPSS Version 25.0. Analyses used odds ratios (OR) with  
32  
33 95% confidence intervals (95%CI) with respect to the national income in the respondent's country.  
34  
35 Fisher's exact tests if the expected number of responses were below 6. There was limited missing data,  
36  
37 which was left out from the analyses.  
38  
39  
40  
41  
42  
43  
44

## 45 **Results**

### 46 *Definition of suicide*

47  
48 Agreement on the definition of suicide was assessed as first. For each of the main components of the  
49  
50 definition of suicide - i.e., outcome, intent, knowledge, and agency<sup>4</sup> - a set of statements was provided,  
51  
52 and different suggestions were made to complete the statements. Respondents had to choose the  
53  
54 suggestion with which they agreed. The choices of respondents are shown in Figure 1 by the income  
55  
56 of countries' (LMICs vs. HICs).  
57  
58  
59  
60

1  
2  
3  
4  
5  
6 - Please, insert Figure 1  
7  
8  
9  
10  
11

12 In terms of outcome, majority (81.6%; 1 missing) agreed that, "Suicide is an act that necessarily leads  
13 to death". Regarding intent, five non-mutually exclusive statements were proposed (Figure 1). More  
14 than half of respondents agreed with the last statement (5: "Suicide is an act that may be done without  
15 explicit intent to die"). However, respondents agreed more frequently with statements 2-4 (2: "Suicide  
16 is an act that may be done with an intent other than an explicit intent to die"; 3: "Suicide is an act that  
17 may be done with an ambiguous or unclear intent"; 4: "Suicide is an act that may be done with an  
18 intent to take the risk of dying"). Respondents from HIC were more likely to choose statement 3  
19 (OR:2.35; 95%CI: 1.03-5.36), but also in the LMIC group almost 60% of respondents agreed with this  
20 statement.  
21  
22  
23  
24  
25  
26  
27  
28  
29  
30  
31

32  
33 In terms of knowledge of the consequences of the act, four statements were proposed. More than half  
34 the respondents agreed with the statement: "Suicide is an act that can be performed with the  
35 knowledge of a fatal result, but the person is not certain of that result", regardless of national income.  
36  
37 Regarding agency, more than half (60%; 1 missing) of respondents agreed with the statement, "Suicide  
38 is an act that is initiated by oneself, but not necessarily carried out by oneself to the end of the action".  
39  
40  
41  
42  
43  
44  
45  
46  
47

#### 48 *Definition of non-fatal forms of suicidal behaviours*

49

50  
51 For non-fatal suicidal behaviours, a vignette method was used and a set of 16 basic clinical scenarios  
52 was proposed. For each vignette, a list of terms was proposed from which respondents had to choose  
53 a single answer. The percentages of agreement with particular terms for vignettes 1-16 according to  
54 respondents' countries' national income are presented in Figures 2 and 3.  
55  
56  
57  
58  
59  
60

1  
2  
3 Vignette 1 asked respondents how they would name the act of a person who harmed him- or her-self  
4 with the intention to die but survived. The majority of respondents (92.1%) named the act as a 'suicide  
5 attempt' (Figure 2). Vignette 2 described a person who harmed him- or her-self without any intention  
6 to die and survived. The answers were not unanimous; however, the highest agreement was reached  
7 for the term 'self-harm' (27.8%), followed by non-suicidal self-injury' (NSSI; 19%) and 'deliberate self-  
8 harm (17.5%). Vignette 3 described a person who harmed him- or her-self without any intention to die  
9 but died. The highest level of agreement was reached for 'suicide' (24.0%), although 'accident' was  
10 also a frequent choice (17.6%).  
11  
12  
13  
14  
15  
16  
17  
18  
19  
20  
21  
22  
23  
24  
25  
26  
27  
28  
29  
30

- Please, insert Figure 2

31 Vignette 4 asked respondents to define the act of a person who harmed him- or her-self, but, for  
32 whatever reasons, could not state his or her intentions and the person survived. While a 'suicide  
33 attempt' was the most frequent choice for LMIC (37.8%), HICs chose 'self-harm' most frequently  
34 (21.8%; OR:0.40; 95%CI: 0.17-0.93; 2 missing). Vignette 5 described a person who harmed him- or her-  
35 self but *did not want* to state his or her intentions and the person survived. The closest levels of  
36 agreement between income groups were for 'suicide attempt' (27.4%) even though the HIC group  
37 chose 'self-harm' most frequently (26.4%).  
38  
39  
40  
41  
42  
43  
44  
45  
46  
47  
48  
49  
50  
51  
52  
53  
54  
55  
56  
57  
58  
59  
60

Vignette 6 asked respondents to define the act of a person who died as a consequence of harming him  
or her-self, but his or her intentions in doing so could not be known or inferred. Two answers stood  
out: 'suicide' (42.1%) and 'undetermined death' (31.7%). Respondents from HICs were more likely to  
choose 'undetermined death' (HICs: 37.1% vs. LMICs: 54.1%; OR:2.53; 95%CI: 1.00-6.39), and  
respondents from LMICs 'suicide' (HICs: 37.1% vs. LMICs: 18.9%; OR:0.50; CI 95%: 0.23-1.09).

1  
2  
3 Vignette 7 described someone who occasionally thought of suicide when feeling distressed: all groups  
4 chose 'suicidal ideation' most frequently (64.8%). Vignette 8 described someone who continuously  
5 thought of suicide but had no suicidal intent. All groups chose 'suicidal ideation' most frequently  
6 (45.2%), followed by 'persistent suicidal ideation' (31%).  
7  
8  
9

10  
11  
12 Figure 3 shows respondents' answers to vignettes 9 to 16 according to income and language groups.  
13  
14 Vignette 9 described someone who hoped for death but had no thoughts of killing him- or her-self.  
15 Respondents chose 'death wishes' (57.6%) most frequently across all groups. Vignette 10 described  
16 someone who hoped for death by killing him- or her-self, and most respondents chose the 'suicidal  
17 ideation' (61.6%) followed by 'active suicidal ideation' (32%).  
18  
19  
20  
21  
22  
23  
24  
25  
26  
27

28 - Please, insert Figure 3  
29  
30  
31  
32  
33

34 The following vignettes described behaviours that could be considered as being at the boundary  
35 between behaviour and ideation and could therefore be subject to debate. Vignette 11 asked  
36 respondents to choose a term for someone who stated suicidal intention without engaging in the  
37 behaviour. Although all groups most frequently decided that the person was experiencing 'suicidal  
38 ideation' (56.9% for all), HICs' respondents were more likely to choose 'suicidal ideation' than LMICs  
39 (HICs:63.6%, LMICs:40%; OR:2.63; 95%CI: 1.18-5.87; 3 missing),  
40  
41  
42  
43  
44  
45  
46  
47

48 Vignette 12 described someone who mimicked (i.e. acted in a way that had the appearance of) suicidal  
49 behaviour without sustaining any injuries. The two most frequently chosen answers were 'suicidal  
50 behaviour' (35.6%) and 'suicide threat' (19.5%). However, HICs' respondents were more likely to  
51 choose 'suicidal behaviour' (HICs: 63.6% vs. LMICs: 40%; OR:4.32; 95%CI: 1.52-12.26; 8 missing).  
52  
53  
54  
55  
56

57 Vignette 13 asked the respondent to define the behaviour of someone who had decided how and when  
58 to perform a suicidal act, but did not actively prepare anything. The 'suicide plan' was most commonly  
59  
60

1  
2  
3 chosen (67.5%). Vignette 14 described someone who prepared a suicidal act (e.g. assembled pills,  
4 bought a gun, attached a rope, visited a bridge), but did not initiate it and consequently did not sustain  
5 any injuries. The two most frequently chosen options were 'preparatory suicidal behaviour' (42.6%)  
6 and 'suicide plan' (34.4%). HICs' respondents were more likely to choose 'preparatory suicidal  
7 behaviour' (HICs: 48.9% vs. LMICs: 26.5%; OR:2.65; 95%CI: 1.11-6.33; 4 missing) and the LMIC group  
8 chose 'suicide plan' most frequently (HICs: 34.1% vs. LMICs: 35.3%).  
9

10  
11  
12 Vignette 15 asked the respondent to define the behaviour of someone who initiated a suicidal act (e.g.  
13 stood or sat on the edge of a high bridge, tied a rope around his or her neck), but stopped him- or her-  
14 self before sustaining any injury. The 'aborted suicide attempt' was the most commonly chosen option  
15 (33.1%) followed by the 'suicide attempt' (19%). The HIC group chose the 'aborted suicide attempt'  
16 most frequently (HICs: 37.9% vs. LMICs: 20.6%) whereas the LMIC group chose 'suicide attempt' (HICs:  
17 14.9% vs. LMICs: 29.4%). Vignette 16 described someone who initiated a suicidal act (e.g. stood or sat  
18 on the edge of a high bridge, tied a rope around his or her neck), but was stopped by someone else  
19 before sustaining any injuries. The majority agreed on the 'interrupted suicide attempt' (58.7%),  
20 followed by the 'suicide attempt' (27.3%).  
21  
22  
23  
24  
25  
26  
27  
28  
29  
30  
31  
32  
33  
34  
35  
36  
37  
38  
39  
40

## 41 Discussion

42  
43  
44 Previous attempts at developing a nomenclature for suicidal behaviours have been published (e.g.,<sup>5-</sup>  
45 7), but none reached international consensus.<sup>8</sup> Several classifications of suicidal behaviours have also  
46 been developed and published, and some were based on the above-mentioned nomenclatures.<sup>9</sup> To  
47 date, the only classification validated by the WHO is a classification restricted to methods of self-  
48 harm.<sup>10</sup> To our knowledge, no previous survey has focused on reaching consensus on a nomenclature  
49 of suicidal behaviours. The results of the present study could give a contribution in this direction, while  
50 also looking at differences between HICs and LMICs regarding terminologies used.  
51  
52  
53  
54  
55  
56  
57  
58  
59  
60

1  
2  
3 The answers of survey participants regarding the four characteristics of the definition of suicide could  
4 delineate some level of consensus. Regarding outcome, all respondents agreed that *suicide is an act*  
5 *resulting in death*. This sets a clear distinction between suicide and non-fatal suicidal behaviours and  
6 corresponds to the majority of definitions of suicide found in the literature.<sup>3</sup>  
7  
8  
9

10  
11  
12 Regarding intent, more than half of respondents agreed that suicide could be undertaken *without*  
13 explicit intent to die. Indeed, only a few definitions of suicide did not mention intent to die as a central  
14 characteristic of the act.<sup>5,11,12</sup> In De Leo et al.'s<sup>13</sup> definition, intent targeted “wanted changes” (p. 12).  
15 These authors argued that intent to die - assumed to be at least in minimal part present (greater than  
16 zero) - can be concurrent with other purposes, and that people attempting suicide may even be trying  
17 to improve their life or have other underlying motives, such as escaping from an unbearable situation.  
18 According to the answers to our survey, *suicide is an act in which intent may not be explicit but*  
19 *ambiguous and unclear, and involving the risk of dying*.  
20  
21  
22  
23  
24  
25  
26  
27  
28  
29  
30

31 In literature, knowledge of potentially fatal outcome was often suggested as a requirement for the  
32 definition of suicide.<sup>4,13</sup> In the present survey, according to the vast majority of respondents, *suicide is*  
33 *an act carried out with the knowledge of a potentially fatal result*.  
34  
35  
36  
37  
38

39 The respondents stressed the importance of distinguishing suicide from assisted suicide and  
40 euthanasia. Generally, they expressed the choice for a definition excluding the possibility of an outside  
41 agent. This appears in contradiction with most literature (e.g.,<sup>4</sup>). According to most respondents in this  
42 study, *suicide is an act initiated and carried out by oneself to the end of the action*. However, in our  
43 view, if widely accepted, this determination could lead to several problems, bringing to a substantial  
44 underestimation of suicide mortality. For instance, an act in which a person stands in front of a moving  
45 object (e.g., a train or a truck driven by another person) could hardly be considered as *assisted suicide*.  
46 Keeping in mind the limitations of the present survey (e.g., representativeness of the sample; clarity  
47 of vignettes; deepening of details, etc.), the indications coming from this area of our study seem to  
48 emphasize the importance of a shared set of definitions among scholars in the field of suicide. The  
49  
50  
51  
52  
53  
54  
55  
56  
57  
58  
59  
60

1  
2  
3 discrepancy detected at the level of definition of suicide among study participants is of relevance and  
4  
5 underlines the appropriateness of research efforts in the definitional domain.  
6  
7

8 Evidence of intent to die is central to the definition of 'suicide attempt', a behaviour in which *a person*  
9  
10 *harms him- or her-self, with the intention to die, and survives*, in agreement with existing literature.<sup>5,6,14</sup>  
11

12 The term 'suicide attempt' was deemed acceptable in a recent wide scale survey and recommended  
13  
14 for academic and media use.<sup>15</sup> 'Self-harm' was the preferred term in cases in which there was no  
15  
16 evidence of intent to die (i.e., vignette 2) and elicited less disagreement than 'suicide attempt' when  
17  
18 intent could not be determined (i.e., vignettes 4 and 5). In the literature, 'self-harm' and 'deliberate  
19  
20 self-harm' have been described either in absence of suicidal intent<sup>7,16,17</sup> or regardless of suicidal  
21  
22 intent.<sup>18,19</sup> The term '*deliberate self-harm*' was not favoured in respondents' answers; their comments  
23  
24 suggested that it could be stigmatizing. The term 'self-harm' could thus be defined as a *non-fatal act*  
25  
26 *in which a person harms him- or her-self, and intent to die is either absent or not accessible to*  
27  
28 *observation*. The question remains as to whether this term could be placed in an overarching position  
29  
30 in a nomenclature, regardless of the level of intent to die (thus including 'suicide attempt'). Statement  
31  
32 of intent differs depending on the person interviewed (e.g., patient, family, or clinician) and timing of  
33  
34 the interview (e.g., intent to die could be masked or denied when the patient becomes aware of the  
35  
36 possibility of being admitted to a locked inpatient unit). For example, Kapur et al.<sup>20</sup> argued against  
37  
38 distinguishing acts of self-harm according to intent.  
39  
40  
41  
42  
43  
44

45 On the basis of this survey results, if intent to die has been stated by the patient, it may be more  
46  
47 appropriate to consider the term 'suicide attempt' rather than 'self-harm'.  
48  
49

50 Regarding 'suicidal ideation', Silverman et al.<sup>7</sup> distinguished between 'no ideation' vs. 'undetermined  
51  
52 degree' vs. 'some suicidal intent', and further subdivided the categories into 'casual', 'transient',  
53  
54 'passive', 'active', and 'persistent'. The responses to our survey suggest a rather inclusive definition of  
55  
56 'suicidal ideation': *Thinking of suicide with or without suicidal intent; hoping for death by killing oneself;*  
57  
58 *and, stating the presence of suicidal intention without engaging in behaviour*. Further research may  
59  
60

1  
2  
3 consider sub-dividers such as *with/without suicidal intent, transient, reactive, persistent, or with*  
4  
5 *communication.*

6  
7  
8 'Death wishes' were defined by respondents as *hoping for death without thoughts of killing oneself,*  
9  
10 and were less inclusive than Balaguer et al.'s<sup>21</sup> 'wish to hasten death', which was an overarching  
11  
12 category including suicidal ideation.

13  
14  
15 O'Carroll et al.<sup>6</sup> defined 'suicide threat' as "*any interpersonal action, verbal or nonverbal, stopping*  
16  
17 *short of a directly self-harmful act that a reasonable person would interpret as communicating or*  
18  
19 *suggesting that a suicidal act or other suicide-related behaviour might occur in the near future*" (p.  
20  
21 247). Silverman et al.<sup>7</sup> defined this term in a similar way. Vignette 12 was a case scenario designed to  
22  
23 illustrate this definition. However, many participants did not respond to this vignette, and the  
24  
25 significant disagreement between groups should lead to caution in interpreting results.

26  
27  
28 Based on responses to our survey, a 'suicide plan' could be defined as *having decided how and when*  
29  
30 *to perform a suicidal act.* This definition is comparable to that of Silverman et al.,<sup>7</sup> which does not  
31  
32 include preparatory behaviour. A suggested definition should thus exclude *active preparation.*

33  
34  
35 Despite some disagreement between respondents, 'preparatory suicidal behaviour' could be defined  
36  
37 as *preparing for a suicidal act (e.g. collecting pills, buying a gun, attaching a rope, visiting a bridge),*  
38  
39 *but without initiating it and thus not sustaining any injury.* This definition is similar to that given by  
40  
41 Posner et al.<sup>22</sup> However, these authors also considered 'aborted' and 'interrupted suicide attempt' and  
42  
43 thus a *preparatory act* was an umbrella term, which was not the case for our survey. Based on results,  
44  
45 an 'aborted suicide attempt' could be defined as an act in which a person *initiates a suicidal act (e.g.*  
46  
47 *stands or sits on the edge of a high bridge; ties a rope around his or her neck; etc.), but stops him/herself*  
48  
49 *before sustaining any injury* (Vignette 15).

50  
51  
52 An 'interrupted suicide attempt' could be defined as *initiating a suicidal act (e.g. standing or sitting on*  
53  
54 *the edge of a high bridge, tying a rope around one's neck), but being stopped by someone else before*  
55  
56  
57  
58  
59  
60



1  
2  
3 *sustaining any injury* (vignette 16). These definitions are indeed comparable to those reported by  
4  
5 Posner et al.<sup>22</sup>  
6

### 7 8 *Differences between HICs and LMICs* 9

10  
11 It was expected that the level of national income would have an influence on preferred terminology of  
12  
13 the respondents considering HICs have more resources for professionals working in suicidology,  
14  
15 advanced health care systems, and more academic and research background than LMICs. Furthermore,  
16  
17 there are notable cultural differences, which could have further impact on the terminology.  
18  
19

20  
21 Our results identified some notable differences between respondents from LMICs and HICs.  
22  
23 Respondents from HICs were more likely to agree that, in suicide, intent may be ambiguous or unclear.  
24  
25 Differences in responses to vignette 4 (i.e., non-fatal suicidal behaviour, but person cannot state  
26  
27 intentions) could suggest that respondents from LMICs did not distinguish non-fatal behaviours as  
28  
29 precisely regarding intent as respondents from HICs, who were more likely to name the behaviour  
30  
31 'self-harm.' Interestingly in Vignette 6 (i.e. fatal suicidal behaviour with no evidence of intent),  
32  
33 respondents from HICs were more likely to choose 'undetermined death' rather than 'suicide', which  
34  
35 was somewhat in contradiction with an open definition of suicide regarding intent. Some differences  
36  
37 were found for Vignette 11, 12 and 14, but none of these related to a pattern in which respondents  
38  
39 form HICs had more precise terminology than respondents from LMICs. Overall, no clear differential  
40  
41 pattern could be evidenced in responses given for the four characteristics of suicide, and respondents  
42  
43 from LMICs had an equal range of terms to name the behaviours in the vignettes.  
44  
45  
46  
47

### 48 49 *Strengths and limitations* 50

51  
52 Representatives of 63 countries (slightly less than a third of all 193 WHO member countries)  
53  
54 participated in the ISDELTSB. If any nomenclature has to be internationally applicable, efforts should  
55  
56 be dedicated to increasing the number of countries taking part in this type of research, especially  
57  
58 among LMICs. It should be noted that seven out of 30 LMICs (23%) had a national suicide prevention  
59  
60

1  
2  
3 strategy, compared to 15 out of 33 HICs (45%). Yet, despite their relatively low number, participating  
4  
5 countries account for two thirds of the world population and three quarters of all suicides.<sup>23</sup>  
6  
7

8 LMICs were represented by 37 participants and HICs by 89 participants, which implies a bias towards  
9  
10 responses from HICs and the analysis showed a few notable differences. Nevertheless, the relatively  
11  
12 high number of LMICs included in the study was achieved by using a recruitment approach based on  
13  
14 institutionally- and self-defined expertise. The fact that there was no operational definition regarding  
15  
16 expertise in suicidology is another limitation to our study. However, differences between the HICs are  
17  
18 also very likely.  
19  
20  
21

22 The initial idea of using one 'representative' per country (the IASP national delegate) was chosen to  
23  
24 give comparable weight to all participating countries. The small dimension of this sample brought to  
25  
26 an extension to individual members of IASP. However, the final number of participants remained quite  
27  
28 low; the obtained results need to be replicated in studies with bigger samples.  
29  
30  
31

32 As mentioned in the companion paper on methodology,<sup>3</sup> the questionnaire was not translated into  
33  
34 different languages but presented in English. This has probably limited participation to the study; in  
35  
36 addition, it may have led to discrepancies in understanding questions. We need to acknowledge that  
37  
38 all conclusions should be taken with caution.  
39  
40  
41

#### 42 *Implications for further research*

43  
44

45 Table 1 collates the most frequently chosen terms together, with their matching definition. The  
46  
47 resulting nomenclature can be considered as an attempt at promoting consensus in a wide range of  
48  
49 cultural settings. It tries to encompass the whole range of suicidal behaviours and ideation. However,  
50  
51 as mentioned above, not everything comes as crystal clear. For example, suicide was frequently  
52  
53 interpreted as an act performed to completion by the actor itself, not involving a third agent. Intent to  
54  
55 die appears as necessary to define a suicide attempt, but intent can be vague or unclear for a suicide.  
56  
57  
58  
59  
60

1  
2  
3 There are terms that may receive an overarching character. For instance, 'self-harm' may include  
4 behaviours in which there is no intent to die and those in which intent is unknown.  
5  
6  
7

8 The 'preparatory suicidal behaviour' category could include both 'aborted' and 'interrupted suicide  
9 attempt' or, as suggested in our survey, could also be distinct, owing to differences in the moment in  
10 which the behaviour stops (i.e. after preparations are finished or after the suicidal act is initiated).  
11  
12  
13

14  
15  
16 The nomenclature presented in Table 1 should thus be considered as a working base to advance in the  
17 direction of a universal classification of suicidal behaviours.  
18  
19  
20

21  
22  
23  
24 - Please insert Table 1  
25  
26

## 27 **Conclusion**

28  
29  
30 The development of an internationally applicable nomenclature and classification of suicidal  
31 behaviours would be a long and complex process. The IASP Special Interest Group on Nomenclature  
32 would be ideally positioned to carry out this task with the help of a large and motivated international  
33 membership. Using the results of an international opinion survey, a tentative nomenclature of suicidal  
34 behaviour is proposed. Indications from this survey may be utilized by the Special Interest Group.  
35  
36  
37  
38  
39  
40  
41  
42  
43  
44  
45  
46  
47  
48  
49  
50  
51  
52  
53  
54  
55  
56  
57  
58  
59  
60  
61  
62  
63  
64  
65  
66  
67  
68  
69  
70  
71  
72  
73  
74  
75  
76  
77  
78  
79  
80  
81  
82  
83  
84  
85  
86  
87  
88  
89  
90  
91  
92  
93  
94  
95  
96  
97  
98  
99  
100  
101  
102  
103  
104  
105  
106  
107  
108  
109  
110  
111  
112  
113  
114  
115  
116  
117  
118  
119  
120  
121  
122  
123  
124  
125  
126  
127  
128  
129  
130  
131  
132  
133  
134  
135  
136  
137  
138  
139  
140  
141  
142  
143  
144  
145  
146  
147  
148  
149  
150  
151  
152  
153  
154  
155  
156  
157  
158  
159  
160  
161  
162  
163  
164  
165  
166  
167  
168  
169  
170  
171  
172  
173  
174  
175  
176  
177  
178  
179  
180  
181  
182  
183  
184  
185  
186  
187  
188  
189  
190  
191  
192  
193  
194  
195  
196  
197  
198  
199  
200  
201  
202  
203  
204  
205  
206  
207  
208  
209  
210  
211  
212  
213  
214  
215  
216  
217  
218  
219  
220  
221  
222  
223  
224  
225  
226  
227  
228  
229  
230  
231  
232  
233  
234  
235  
236  
237  
238  
239  
240  
241  
242  
243  
244  
245  
246  
247  
248  
249  
250  
251  
252  
253  
254  
255  
256  
257  
258  
259  
260  
261  
262  
263  
264  
265  
266  
267  
268  
269  
270  
271  
272  
273  
274  
275  
276  
277  
278  
279  
280  
281  
282  
283  
284  
285  
286  
287  
288  
289  
290  
291  
292  
293  
294  
295  
296  
297  
298  
299  
300  
301  
302  
303  
304  
305  
306  
307  
308  
309  
310  
311  
312  
313  
314  
315  
316  
317  
318  
319  
320  
321  
322  
323  
324  
325  
326  
327  
328  
329  
330  
331  
332  
333  
334  
335  
336  
337  
338  
339  
340  
341  
342  
343  
344  
345  
346  
347  
348  
349  
350  
351  
352  
353  
354  
355  
356  
357  
358  
359  
360  
361  
362  
363  
364  
365  
366  
367  
368  
369  
370  
371  
372  
373  
374  
375  
376  
377  
378  
379  
380  
381  
382  
383  
384  
385  
386  
387  
388  
389  
390  
391  
392  
393  
394  
395  
396  
397  
398  
399  
400  
401  
402  
403  
404  
405  
406  
407  
408  
409  
410  
411  
412  
413  
414  
415  
416  
417  
418  
419  
420  
421  
422  
423  
424  
425  
426  
427  
428  
429  
430  
431  
432  
433  
434  
435  
436  
437  
438  
439  
440  
441  
442  
443  
444  
445  
446  
447  
448  
449  
450  
451  
452  
453  
454  
455  
456  
457  
458  
459  
460  
461  
462  
463  
464  
465  
466  
467  
468  
469  
470  
471  
472  
473  
474  
475  
476  
477  
478  
479  
480  
481  
482  
483  
484  
485  
486  
487  
488  
489  
490  
491  
492  
493  
494  
495  
496  
497  
498  
499  
500  
501  
502  
503  
504  
505  
506  
507  
508  
509  
510  
511  
512  
513  
514  
515  
516  
517  
518  
519  
520  
521  
522  
523  
524  
525  
526  
527  
528  
529  
530  
531  
532  
533  
534  
535  
536  
537  
538  
539  
540  
541  
542  
543  
544  
545  
546  
547  
548  
549  
550  
551  
552  
553  
554  
555  
556  
557  
558  
559  
560  
561  
562  
563  
564  
565  
566  
567  
568  
569  
570  
571  
572  
573  
574  
575  
576  
577  
578  
579  
580  
581  
582  
583  
584  
585  
586  
587  
588  
589  
590  
591  
592  
593  
594  
595  
596  
597  
598  
599  
600  
601  
602  
603  
604  
605  
606  
607  
608  
609  
610  
611  
612  
613  
614  
615  
616  
617  
618  
619  
620  
621  
622  
623  
624  
625  
626  
627  
628  
629  
630  
631  
632  
633  
634  
635  
636  
637  
638  
639  
640  
641  
642  
643  
644  
645  
646  
647  
648  
649  
650  
651  
652  
653  
654  
655  
656  
657  
658  
659  
660  
661  
662  
663  
664  
665  
666  
667  
668  
669  
670  
671  
672  
673  
674  
675  
676  
677  
678  
679  
680  
681  
682  
683  
684  
685  
686  
687  
688  
689  
690  
691  
692  
693  
694  
695  
696  
697  
698  
699  
700  
701  
702  
703  
704  
705  
706  
707  
708  
709  
710  
711  
712  
713  
714  
715  
716  
717  
718  
719  
720  
721  
722  
723  
724  
725  
726  
727  
728  
729  
730  
731  
732  
733  
734  
735  
736  
737  
738  
739  
740  
741  
742  
743  
744  
745  
746  
747  
748  
749  
750  
751  
752  
753  
754  
755  
756  
757  
758  
759  
760  
761  
762  
763  
764  
765  
766  
767  
768  
769  
770  
771  
772  
773  
774  
775  
776  
777  
778  
779  
780  
781  
782  
783  
784  
785  
786  
787  
788  
789  
790  
791  
792  
793  
794  
795  
796  
797  
798  
799  
800  
801  
802  
803  
804  
805  
806  
807  
808  
809  
810  
811  
812  
813  
814  
815  
816  
817  
818  
819  
820  
821  
822  
823  
824  
825  
826  
827  
828  
829  
830  
831  
832  
833  
834  
835  
836  
837  
838  
839  
840  
841  
842  
843  
844  
845  
846  
847  
848  
849  
850  
851  
852  
853  
854  
855  
856  
857  
858  
859  
860  
861  
862  
863  
864  
865  
866  
867  
868  
869  
870  
871  
872  
873  
874  
875  
876  
877  
878  
879  
880  
881  
882  
883  
884  
885  
886  
887  
888  
889  
890  
891  
892  
893  
894  
895  
896  
897  
898  
899  
900  
901  
902  
903  
904  
905  
906  
907  
908  
909  
910  
911  
912  
913  
914  
915  
916  
917  
918  
919  
920  
921  
922  
923  
924  
925  
926  
927  
928  
929  
930  
931  
932  
933  
934  
935  
936  
937  
938  
939  
940  
941  
942  
943  
944  
945  
946  
947  
948  
949  
950  
951  
952  
953  
954  
955  
956  
957  
958  
959  
960  
961  
962  
963  
964  
965  
966  
967  
968  
969  
970  
971  
972  
973  
974  
975  
976  
977  
978  
979  
980  
981  
982  
983  
984  
985  
986  
987  
988  
989  
990  
991  
992  
993  
994  
995  
996  
997  
998  
999  
1000

## Acknowledgements

For their assistance in recruiting participants and distributing the questionnaire we are extremely grateful to IASP Administrative Officers, Wendy Orchard and Wendy Cliff; Professor Roy Abraham Kallivayalil, Secretary General at the WPA, as well as the WPA team; Professor Chris Dowrick, Chair of Working Party for Mental Health at WONCA, as well as the WONCA team. We would also like to acknowledge all those who participated in ISDELTSB ©: Dr Bashir Sarwari, Dr Ernesto Ruben Paez, Dr Jo Robinson, Dr Thomas Niederkrotenthaler, Dr Gwendolyn Portzky, Dr Daravuth Yel, Professor Jie Zhang, Dr Marta Ardilla, Dr Annette Erlangsen, Professor Merike Sisask, Dr Stephane Amadeo, Dr Reinhard Lindner, Professor Charity Akotia, Professor Christos Lionis, Dr Frances Yik Wa Law, Dr Sandor Fekete, Dr Wilhelm Nordfjord, Professor Seyed Kazem Malakouti, Dr Marco Innamorati, Dr Chiaki Kawanishi, Miss Merab Mulindi, Professor Elie Karam, Dr Paulius Skruibis, Mrs Neeteeyavathee Appadoo, Dr Liuba Ceban, Dr Remco De Winter, Dr Sylvia Huitson, Dr Alexandre Teixeira, Dr Linnette Rodriguez Figueroa, Dr. Suhaila Ghuloum, Miss Dana-Cristina Herta, Ms Anna-Lisa Labiche, Dr Vita Postuvan, Mr Andoni Ansean , Dr Gergo Hadlaczky, Assistant Professor Prakarn Thomyangkoon, Dr Puloka mapa haano, Professor Gerard Hutchinson, Dr James Mughisha, Professor Vsevolod Rozanov, Dr Bianca Hedge, Professor Madelyn Gould, Dr Silvia Peláez, Dr Alan Apter, Professor Ad Kerkhof, Dr Siegrid Darquet, Professor José Manoel Bertolote, Dr. Benedikt Till, Professor Michel Tousignant, Dr Tracy McCown, Dr M M Jalal Uddin, Professor Øivind Ekeberg, Mr Bronwen Edwards, Dr Priya Sreedaran, Dr Mitsuhiro Yamada, Mrs Karen Lascelles, Professor Jean Pierre Soubrier, Mrs Angela Clapperton, Dr. Tracey King, Dr. Ann Luce, Professor Stephen Platt, Dr Daniel Reidenberg, Mr Dean Martin, Ms Eleanor Bailey, Mr Barry Taylor, Mrs Ann Evans, Mrs Karen Scavacini, Mr Gert Jessen, Mrs Diana Rucli, Dr. Chencho Dorji, Dr Saska Roskar, Dr John Draper, Dr Nathaniel Pollock, Dr Aggrey Burke, Dr Freddy Vasquez, Professor William Feigelman, Mr Sean McCarthy, Luis Miguel Sánchez-Loyo, Mr Andrew Humphreys, Dr Gabriela Silva de Malafaia, Mrs Christine Genest, Professor Chan Lai Fong, Professor Deborah Goebert, Mrs Veronica Rose Marshall Bernard, Mrs. Lakshmi Ratnayeke, Mr Ricardo Gusmão, Professor Chris G. Caulkins, Ms Jill Fisher, Professor Thomas Bronisch, Mr Ernest Garnark

1  
2  
3 Smith Jr., Dr Ellyson Stout, Professor Merete Nordentoft, Dr Zonda Tamás, Mrs Christine Wong, Rev.  
4  
5 Cody Cooper, Dr Pandit Devjyoti Sharma, Mrs Sally Morris, Ms Nicole Hill, Dr Kate Fairweather-Schmidt,  
6  
7 Professor Ping Qin, Professor Ian R.H. Rockett, Dr Maree Inder, Dr Gabrielle Jenkin, Dr Liv Mellesdal,  
8  
9 Mr Thomas Tarurongo Wynne, Mrs Lena Lenehan, Professor Yueqin Huang, Dr Derek de Beurs, Ms  
10  
11 Uzma Irfan, Ms Rosina Acharya. We also thank all those participants who wished to remain  
12  
13 anonymous.  
14  
15  
16  
17  
18  
19

### 20 **Funding**

21  
22  
23 None  
24  
25

### 26 **Conflicts of interest**

27  
28  
29 No conflicts to declare  
30  
31  
32  
33  
34  
35  
36  
37  
38  
39  
40  
41  
42  
43  
44  
45  
46  
47  
48  
49  
50  
51  
52  
53  
54  
55  
56  
57  
58  
59  
60

For peer review only

## References

1. World Health Organization. (2018). National suicide prevention strategies: progress, examples and indicators. (9241515015). Retrieved from: [https://www.who.int/mental\\_health/suicide-prevention/national\\_strategies\\_2019/en/](https://www.who.int/mental_health/suicide-prevention/national_strategies_2019/en/) 21 April 2020
2. Silverman, M. M., & De Leo, D. (2016). Why there is a need for an international nomenclature and classification system for suicide. *Crisis*, 37(2), 83-87.
3. Goodfellow, B., Kölves, K., De Leo, D., Silverman, M., M., Berman, A., Mann, J., et al. (2019). International Study of Definitions and Terms for Suicidal Behaviors ©: Protocol of an opinion survey. *BMJ Open*, 2019; 9:e025770. doi:10.1136/bmjopen-2018-025770.
4. Goodfellow, B., Kölves, K., & De Leo, D. (2019). Contemporary definitions of suicidal behavior: a systematic literature review. *Suicide Life-Threat Behav*, 49(2), 488-504.
5. Beck, A., T., Davis, J., H., Frederick, C., J., Perlin, S., Pokorny, A., D., Schulman, R., E., et al. (1973). Classification and Nomenclature. In H. L. P. Resnik & B. C. Hathorne (Eds.), *Suicide Prevention in the 70's* (pp. 7-12): Center for Studies of Suicide Prevention, National Institute of Mental Health.
6. O'Carroll, P., W., Berman, A. L., Maris, R. W., Moscicki, E. K., Tanney, B. L., & Silverman, M. M. (1996). Beyond the Tower of Babel: a nomenclature for suicidology. *Suicide Life Threat Behav*, 26(3), 237-252.
7. Silverman, M. M., Berman, A. L., Sanddal, N. D., O'Carroll P, W., & Joiner, T. E. (2007). Rebuilding the tower of Babel: a revised nomenclature for the study of suicide and suicidal behaviors. Part 2: Suicide-related ideations, communications, and behaviors. *Suicide Life Threat Behav*, 37(3), 264-277.
8. Goodfellow, B., Kölves, K., & De Leo, D. (2018). Contemporary nomenclatures of suicidal behaviors: a systematic literature review. *Suicide Life Threat Behav*, 48(3), 353-366.
9. Goodfellow, B., Kölves, K., & De Leo, D. (2020). Contemporary classifications of suicidal behavior: a systematic literature review. *Crisis*, 41(3), 179-186.

10. World Health Organization. (2016). International Classification of Diseases (ICD). Retrieved from: <http://www.who.int/classifications/icd/en/> 26 May 2020
11. Baechler, J. (1980). A strategic theory. *Suicide Life Threat Behav* 10(2), 70-99.
12. Egel, L. (1999). On the need for a new term for suicide. *Suicide Life Threat Behav*, 29(4), 393-394.
13. De Leo, D., Burgis, S., Bertolote, J. M., Kerkhof, A. J., & Bille-Brahe, U. (2006). Definitions of suicidal behavior: lessons learned from the WHO/EURO multicentre Study. *Crisis*, 27(1), 4-15.
14. Stengel, E. (1964). The suicidal attempt as a behaviour pattern, and its definition. In E. Stengel (Ed.), *Suicide and Attempted Suicide* (pp. 67-73). London: Penguin Books.
15. Padmanathan, P., Biddle, L., Hall, K., Scowcroft, E., Nielsen, E., & Knipe, D. (2019). Language use and suicide: An online cross-sectional survey. *PLoS one*, 14(6), e0217473.
16. Mangnall, J., & Yurkovich, E. (2008). A literature review of deliberate self-harm. *Perspect Psychiatr Care*, 44(3), 175-184.
17. Marusic, A. (2004). Toward a new definition of suicidality? Are we prone to Fregoli's illusion? *Crisis*, 25(4), 145-146.
18. Dear, G. E. (2001). Further comments on the nomenclature for suicide-related thoughts and behavior. *Suicide Life Threat Behav*, 31(2), 234-235.
19. Hawton, K., Harriss, L., Hall, S., Simkin, S., Bale, E., & Bond, A. (2003). Deliberate self-harm in Oxford, 1990–2000: a time of change in patient characteristics. *Psychol Med*, 33(6), 987-995.
20. Kapur, N., Cooper, J., O'Connor, R. C., & Hawton, K. (2013). Non-suicidal self-injury v. attempted suicide: new diagnosis or false dichotomy? *Br J Psychiatry*, 202(5), 326-328.
21. Balaguer, A., Monforte-Royo, C., Porta-Sales, J., Alonso-Babarro, A., Altisent, R., Aradilla-Herrero, A., et al. (2016). An international consensus definition of the wish to hasten death and its related factors. *PLoS one*, 11(1), e0146184.

- 1  
2  
3 22. Posner, K., Oquendo, M. A., Gould, M., Stanley, B., & Davies, M. (2007). Columbia Classification  
4  
5 Algorithm of Suicide Assessment (C-CASA): classification of suicidal events in the FDA's  
6  
7 pediatric suicidal risk analysis of antidepressants. *Am J Psychiatry*, *164*(7), 1035-1043.  
8  
9  
10 23. World Health Organization. (2016a). Suicide data. Retrieved from:  
11  
12 [https://www.who.int/mental\\_health/prevention/suicide/suicideprevent/en/](https://www.who.int/mental_health/prevention/suicide/suicideprevent/en/) 26 Sept 2019  
13  
14 24. Reed, G. M., Mendonca Correia, J., Esparza, P., Saxena, S., & Maj, M. (2011). The WPA-WHO  
15  
16 global survey of psychiatrists' attitudes towards mental disorders classification. *World*  
17  
18 *Psychiatry*, *10*(2), 118-131.  
19  
20  
21  
22  
23  
24  
25  
26  
27  
28  
29  
30  
31  
32  
33  
34  
35  
36  
37  
38  
39  
40  
41  
42  
43  
44  
45  
46  
47  
48  
49  
50  
51  
52  
53  
54  
55  
56  
57  
58  
59  
60



Table 1. Nomenclature of suicidal behaviours after the ISDELTSB

| <b>Designating term or expression</b> | <b>Definition</b>                                                                                                                                                                                                                                                                    |
|---------------------------------------|--------------------------------------------------------------------------------------------------------------------------------------------------------------------------------------------------------------------------------------------------------------------------------------|
| <b>Suicide</b>                        | An act resulting in death which is initiated and carried out by an individual to the end of the action, with the knowledge of a potentially fatal result, and in which intent may be ambiguous or unclear, may involve the risk of dying, or may not involve explicit intent to die. |
| <b>Suicide attempt</b>                | An act in which a person harms him- or her-self, with the intention to die, and survives.                                                                                                                                                                                            |
| <b>Self-harm</b>                      | A non-fatal act in which a person harms him- or her-self intentionally, with varying motives including the wish to die.                                                                                                                                                              |
| <b>Suicidal ideation</b>              | To think of suicide with or without suicidal intent, or hope for death by killing oneself, or state suicidal intention without engaging in behaviour.                                                                                                                                |
| <b>Death wishes</b>                   | To hope for death without thoughts of killing oneself.                                                                                                                                                                                                                               |
| <b>Suicide plan</b>                   | To have decided how and when to perform a suicidal act, but without active preparation.                                                                                                                                                                                              |
| <b>Preparatory suicidal behaviour</b> | To prepare a suicidal act (e.g. assemble pills, buy a gun, attach a rope, visit a bridge), but without initiating it and thus not sustaining any injury.                                                                                                                             |
| <b>Aborted suicide attempt</b>        | An act in which a person initiates a suicidal act (e.g. stands or sits on the edge of a high bridge, ties a rope around his or her neck), but stops him/herself before sustaining any injury.                                                                                        |
| <b>Interrupted suicide attempt</b>    | An act in which a person initiates a suicidal act (e.g. stands or sits on the edge of a high bridge, ties a rope around his or her neck), but is stopped by someone else before sustaining any injuries.                                                                             |

Figure 1. Percentage of respondents who agreed with statements regarding the definition of suicide according to national income in the ISDELTSB sample (HIC=High Income Country; LMIC=Low- and Middle-Income Country)

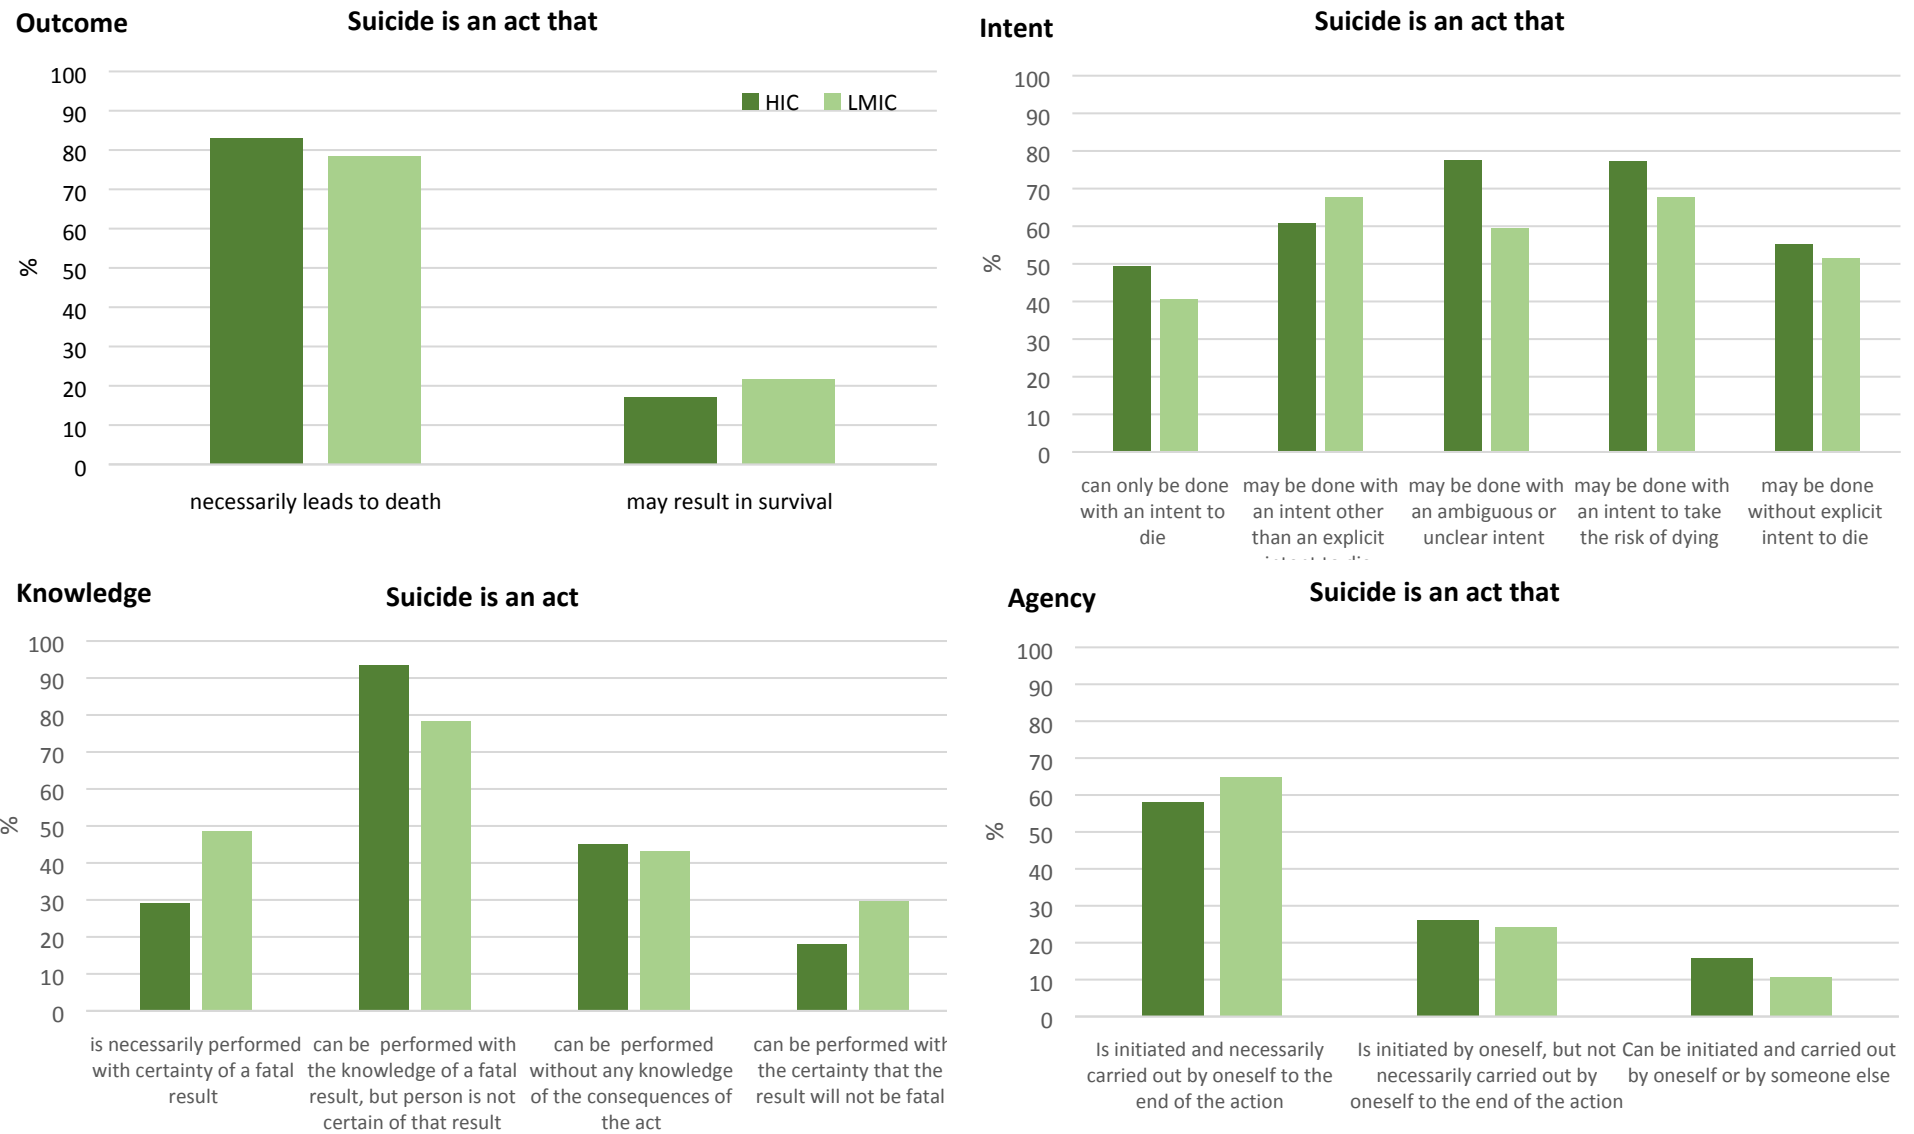

Figure 2. Percentage of respondents agreeing to statements regarding the definition of suicidal behaviours (Vignettes 1-8) by national income in ISDTSB sample (HIC=High Income Country; LMIC=Low- and Middle-Income Country)

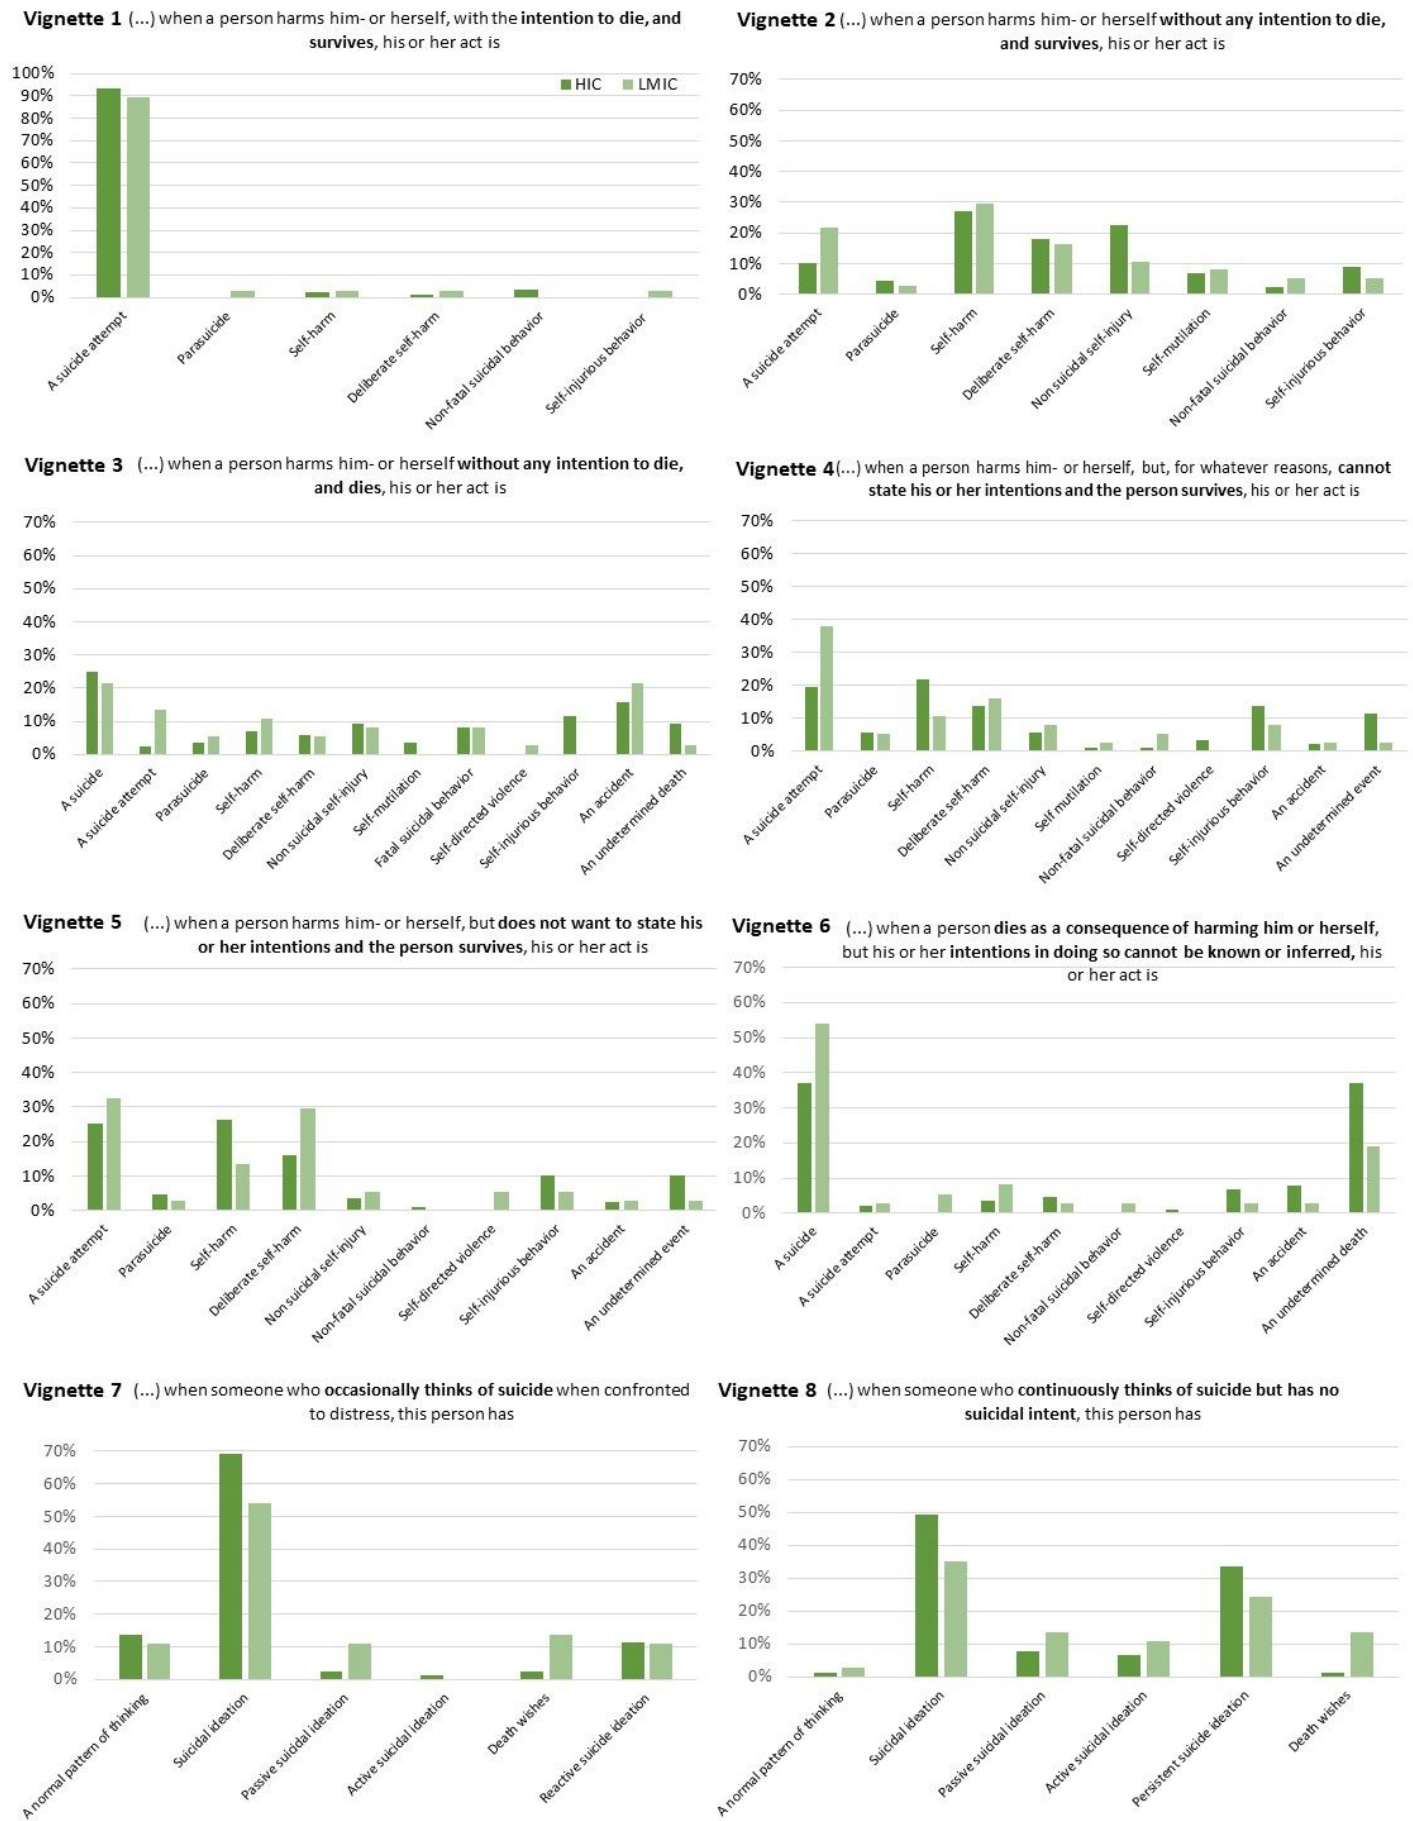

Figure 3. Percentage of respondents agreeing to statements regarding the definition of suicidal behaviours (Vignettes 9-16) by national income in ISDTSB sample (HIC=High Income Country; LMIC=Low- and Middle-Income Country)

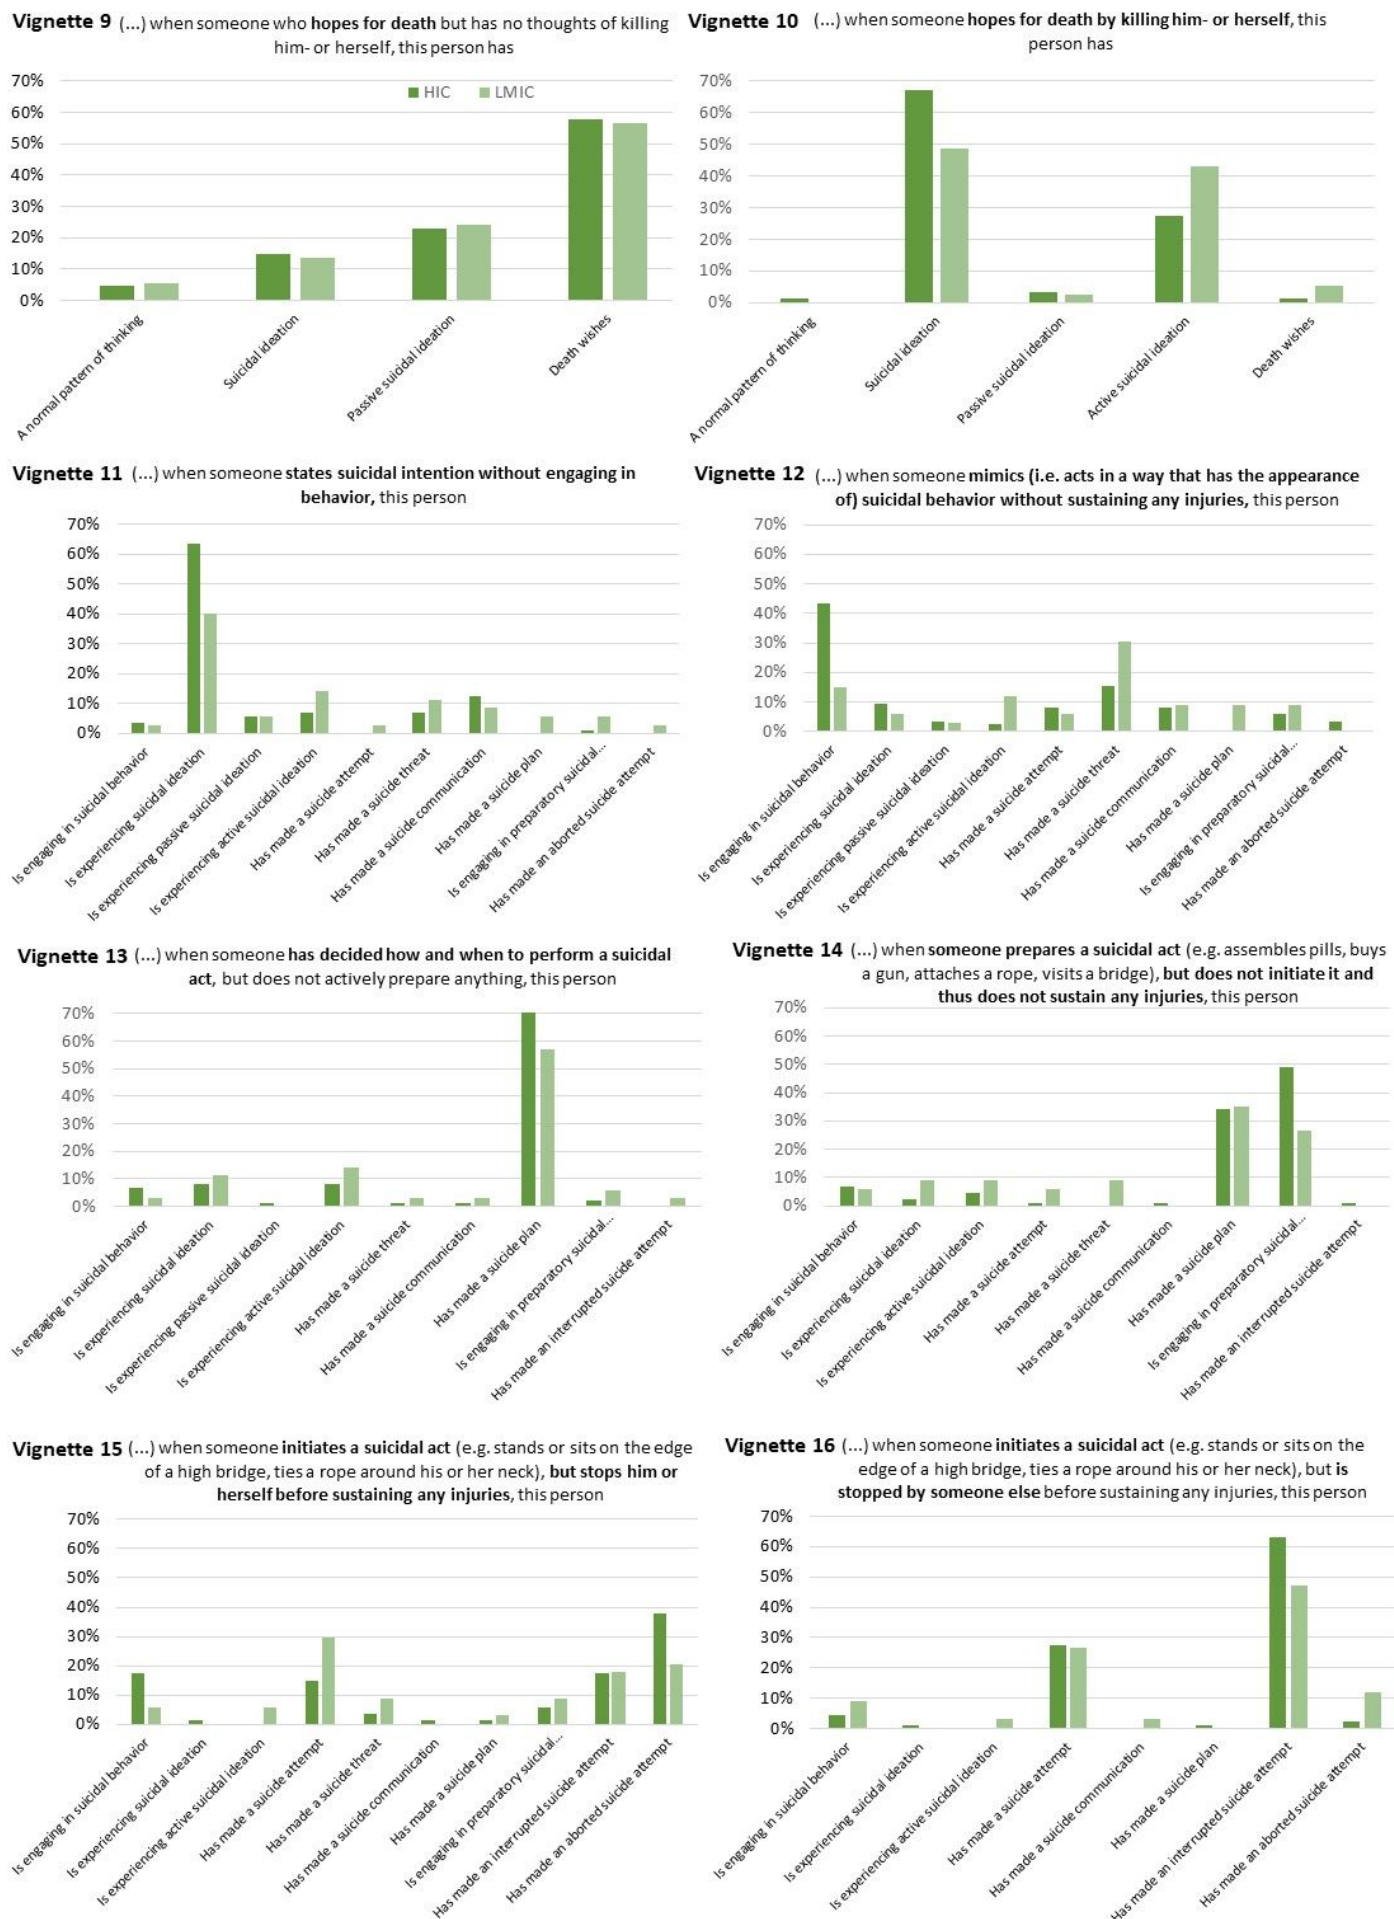

SEM 1: Number of respondents by country/territory that participated to the International Study of Definitions and Terms for Suicidal Behaviors ©

| Countries/territories | 'experts' | IASP members |
|-----------------------|-----------|--------------|
| <b>Africa</b>         |           |              |
| Ghana                 | 1         | 0            |
| Kenya                 | 1         | 0            |
| Liberia               | 0         | 1            |
| Mauritius             | 1         | 1            |
| Seychelles            | 1         | 0            |
| Uganda                | 1         | 0            |
| <b>America</b>        |           |              |
| Argentina             | 1         | 0            |
| Brazil                | 0         | 4            |
| Canada                | 1         | 5            |
| Colombia              | 1         | 0            |
| Mexico                | 1         | 1            |
| Peru                  | 0         | 1            |
| Puerto Rico           | 1         | 0            |
| The Bahamas           | 0         | 1            |
| Trinidad and Tobago   | 1         | 0            |
| Uruguay               | 1         | 0            |
| USA                   | 1         | 8            |
| <b>Asia</b>           |           |              |
| Afghanistan           | 1         | 0            |
| Bangladesh            | 0         | 1            |
| Bhutan                | 0         | 1            |
| Cambodia              | 1         | 0            |
| China                 | 1         | 1            |
| Hong Kong             | 1         | 0            |
| India                 | 0         | 2            |
| Iran                  | 1         | 1            |
| Israel                | 0         | 1            |
| Japan                 | 1         | 1            |
| Lebanon               | 1         | 0            |
| Malaysia              | 0         | 1            |
| Nepal                 | 1         | 0            |
| Pakistan              | 1         | 0            |
| Qatar                 | 1         | 0            |
| Singapore             | 0         | 1            |
| Sri Lanka             | 0         | 1            |
| Taiwan                | 0         | 1            |
| Thailand              | 1         | 0            |
| <b>Europe</b>         |           |              |
| Austria               | 1         | 1            |
| Belgium               | 1         | 1            |
| Denmark               | 1         | 2            |

|    |                         |    |    |
|----|-------------------------|----|----|
| 1  |                         |    |    |
| 2  |                         |    |    |
| 3  | <b>Estonia</b>          | 1  | 0  |
| 4  | <b>France</b>           | 0  | 2  |
| 5  | <b>Germany</b>          | 1  | 1  |
| 6  | <b>Greece</b>           | 1  | 0  |
| 7  | <b>Hungary</b>          | 1  | 1  |
| 8  | <b>Iceland</b>          | 1  | 0  |
| 9  | <b>Ireland</b>          | 0  | 3  |
| 10 | <b>Italy</b>            | 1  | 1  |
| 11 | <b>Lithuania</b>        | 1  | 0  |
| 12 | <b>Moldova</b>          | 1  | 0  |
| 13 | <b>Netherlands</b>      | 1  | 2  |
| 14 | <b>Norway</b>           | 0  | 3  |
| 15 | <b>Portugal</b>         | 1  | 1  |
| 16 | <b>Romania</b>          | 1  | 0  |
| 17 | <b>Slovenia</b>         | 1  | 1  |
| 18 | <b>Spain</b>            | 1  | 0  |
| 19 | <b>Sweden</b>           | 1  | 1  |
| 20 | <b>UK</b>               | 0  | 4  |
| 21 | <b>Ukraine</b>          | 1  | 0  |
| 22 | <b>Oceania</b>          |    |    |
| 23 | <b>Australia</b>        | 1  | 15 |
| 24 | <b>New Zealand</b>      | 1  | 6  |
| 25 | <b>Cook Islands</b>     | 0  | 1  |
| 26 | <b>French Polynesia</b> | 1  | 0  |
| 27 | <b>Tonga</b>            | 1  | 0  |
| 28 | <b>Total</b>            | 46 | 80 |
| 29 |                         |    |    |
| 30 |                         |    |    |
| 31 |                         |    |    |
| 32 |                         |    |    |
| 33 |                         |    |    |
| 34 |                         |    |    |
| 35 |                         |    |    |
| 36 |                         |    |    |
| 37 |                         |    |    |
| 38 |                         |    |    |
| 39 |                         |    |    |
| 40 |                         |    |    |
| 41 |                         |    |    |
| 42 |                         |    |    |
| 43 |                         |    |    |
| 44 |                         |    |    |
| 45 |                         |    |    |
| 46 |                         |    |    |
| 47 |                         |    |    |
| 48 |                         |    |    |
| 49 |                         |    |    |
| 50 |                         |    |    |
| 51 |                         |    |    |
| 52 |                         |    |    |
| 53 |                         |    |    |
| 54 |                         |    |    |
| 55 |                         |    |    |
| 56 |                         |    |    |
| 57 |                         |    |    |
| 58 |                         |    |    |
| 59 |                         |    |    |
| 60 |                         |    |    |

1  
2  
3  
4  
5  
6  
7  
8  
9  
10  
11  
12  
13  
14  
15  
16  
17  
18  
19  
20  
21  
22  
23  
24  
25  
26  
27  
28  
29  
30  
31  
32  
33  
34  
35  
36  
37  
38  
39  
40  
41  
42  
43  
44  
45  
46  
47  
48  
49  
50  
51  
52  
53  
54  
55  
56  
57  
58  
59  
60

SEM 2: International Study of Definitions and Terms for Suicidal Behaviors © participating countries

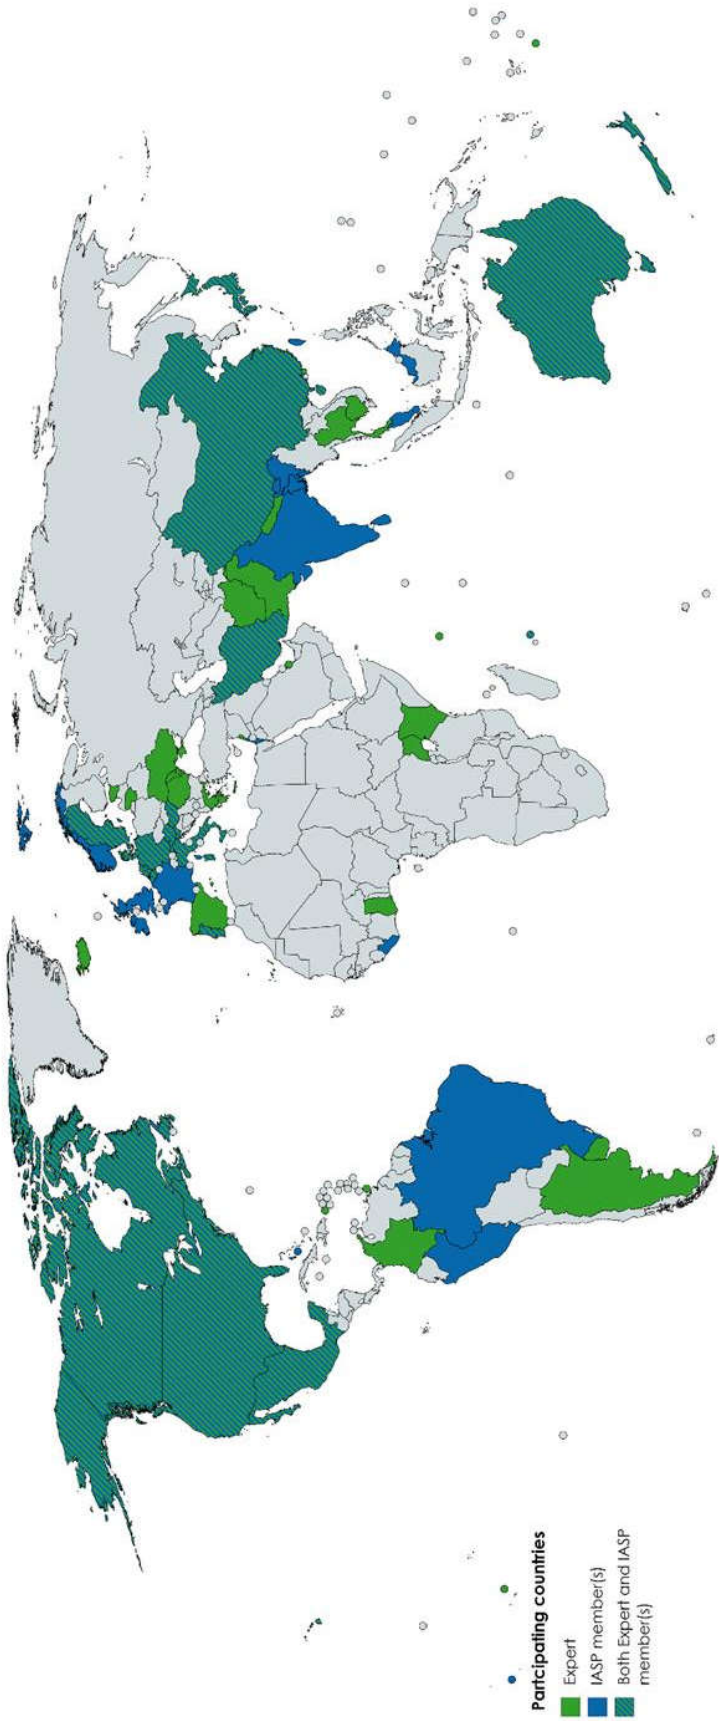

Created with mapchart.net

## STROBE Statement

|                           | Item No. | Recommendation                                                                                                                                                                                    | Page No. |
|---------------------------|----------|---------------------------------------------------------------------------------------------------------------------------------------------------------------------------------------------------|----------|
| <b>Title and abstract</b> | 1        | (a) Indicate the study's design with a commonly used term in the title or the abstract                                                                                                            | 2        |
|                           |          | (b) Provide in the abstract an informative and balanced summary of what was done and what was found                                                                                               | 2        |
| <b>Introduction</b>       |          |                                                                                                                                                                                                   |          |
| Background/rationale      | 2        | Explain the scientific background and rationale for the investigation being reported                                                                                                              | 4        |
| Objectives                | 3        | State specific objectives, including any prespecified hypotheses                                                                                                                                  | 4        |
| <b>Method</b>             |          |                                                                                                                                                                                                   |          |
| Study design              | 4        | Present key elements of study design early in the paper                                                                                                                                           | 5        |
| Setting                   | 5        | Describe the setting, locations, and relevant dates, including periods of recruitment, exposure, follow-up, and data collection                                                                   | 5-6      |
| Participants              | 6        | (a) <i>Cohort study</i> —Give the eligibility criteria, and the sources and methods of selection of participants. Describe methods of follow-up                                                   |          |
|                           |          | <i>Case-control study</i> —Give the eligibility criteria, and the sources and methods of case ascertainment and control selection. Give the rationale for the choice of cases and controls        |          |
|                           |          | <i>Cross-sectional study</i> —Give the eligibility criteria, and the sources and methods of selection of participants                                                                             | 5-6      |
| Variables                 | 7        | Clearly define all outcomes, exposures, predictors, potential confounders, and effect modifiers. Give diagnostic criteria, if applicable                                                          | 5-6      |
| Data sources/measurement  | 8*       | For each variable of interest, give sources of data and details of methods of assessment (measurement). Describe comparability of assessment methods if there is more than one group              | 5        |
| Bias                      | 9        | Describe any efforts to address potential sources of bias                                                                                                                                         | 5-6      |
| Study size                | 10       | Explain how the study size was arrived at                                                                                                                                                         | 6        |
| Quantitative variables    | 11       | Explain how quantitative variables were handled in the analyses. If applicable, describe which groupings were chosen and why                                                                      | 6        |
| Statistical methods       | 12       | (a) Describe all statistical methods, including those used to control for confounding                                                                                                             | 6        |
|                           |          | (b) Describe any methods used to examine subgroups and interactions                                                                                                                               | 6        |
|                           |          | (c) Explain how missing data were addressed                                                                                                                                                       | 6        |
|                           |          | (d) <i>Cohort study</i> —If applicable, explain how loss to follow-up was addressed                                                                                                               | NA       |
|                           |          | <i>Case-control study</i> —If applicable, explain how matching of cases and controls was addressed                                                                                                |          |
|                           |          | <i>Cross-sectional study</i> —If applicable, describe analytical methods taking account of sampling strategy                                                                                      |          |
|                           |          | (e) Describe any sensitivity analyses                                                                                                                                                             | NA       |
| Participants              | 13*      | (a) Report numbers of individuals at each stage of study—eg numbers potentially eligible, examined for eligibility, confirmed eligible, included in the study, completing follow-up, and analysed | 5        |



|                          |     |                                                                                                                                                                                                              |       |
|--------------------------|-----|--------------------------------------------------------------------------------------------------------------------------------------------------------------------------------------------------------------|-------|
|                          |     | (b) Give reasons for non-participation at each stage                                                                                                                                                         | NA    |
|                          |     | (c) Consider use of a flow diagram                                                                                                                                                                           | NA    |
| Descriptive data         | 14* | (a) Give characteristics of study participants (eg demographic, clinical, social) and information on exposures and potential confounders                                                                     | 5-6   |
|                          |     | (b) Indicate number of participants with missing data for each variable of interest                                                                                                                          | 6-10  |
|                          |     | © <i>Cohort study</i> —Summarise follow-up time (eg, average and total amount)                                                                                                                               | NA    |
| Outcome data             | 15* | <i>Cohort study</i> —Report numbers of outcome events or summary measures over time                                                                                                                          |       |
|                          |     | <i>Case-control study</i> —Report numbers in each exposure category, or summary measures of exposure                                                                                                         |       |
|                          |     | <i>Cross-sectional study</i> —Report numbers of outcome events or summary measures                                                                                                                           | 6-10  |
| Main results             | 16  | (a) Give unadjusted estimates and, if applicable, confounder-adjusted estimates and their precision (eg, 95% confidence interval). Make clear which confounders were adjusted for and why they were included | 6-10  |
|                          |     | (b) Report category boundaries when continuous variables were categorized                                                                                                                                    | 6-10  |
|                          |     | © If relevant, consider translating estimates of relative risk into absolute risk for a meaningful time period                                                                                               | NA    |
| Other analyses           | 17  | Report other analyses done—eg analyses of subgroups and interactions, and sensitivity analyses                                                                                                               | 6-10  |
| Key results              | 18  | Summarise key results with reference to study objectives                                                                                                                                                     | 10-12 |
| Limitations              | 19  | Discuss limitations of the study, taking into account sources of potential bias or imprecision. Discuss both direction and magnitude of any potential bias                                                   | 14-15 |
| Interpretation           | 20  | Give a cautious overall interpretation of results considering objectives, limitations, multiplicity of analyses, results from similar studies, and other relevant evidence                                   | 16    |
| Generalisability         | 21  | Discuss the generalisability (external validity) of the study results                                                                                                                                        | 15-16 |
| <b>Other information</b> |     |                                                                                                                                                                                                              |       |
| Funding                  | 22  | Give the source of funding and the role of the funders for the present study and, if applicable, for the original study on which the present article is based                                                | 18    |

\*Give information separately for cases and controls in case-control studies and, if applicable, for exposed and unexposed groups in cohort and cross-sectional studies.

**Note:** An Explanation and Elaboration article discusses each checklist item and gives methodological background and published examples of transparent reporting. The STROBE checklist is best used in conjunction with this article (freely available on the Web sites of PLoS Medicine at <http://www.plosmedicine.org/>, Annals of Internal Medicine at <http://www.annals.org/>, and Epidemiology at <http://www.epidem.com/>). Information on the STROBE Initiative is available at [www.strobe-statement.org](http://www.strobe-statement.org).

# BMJ Open

## International Study of Definitions of English-Language Terms for Suicidal Behaviors ©: Study Results

|                                 |                                                                                                                                                                                                                                                                                                                                                                                                                                                                                                                                                                                                                                                                                                                                                                                                                                                                                                                                                                                                                                                            |
|---------------------------------|------------------------------------------------------------------------------------------------------------------------------------------------------------------------------------------------------------------------------------------------------------------------------------------------------------------------------------------------------------------------------------------------------------------------------------------------------------------------------------------------------------------------------------------------------------------------------------------------------------------------------------------------------------------------------------------------------------------------------------------------------------------------------------------------------------------------------------------------------------------------------------------------------------------------------------------------------------------------------------------------------------------------------------------------------------|
| Journal:                        | <i>BMJ Open</i>                                                                                                                                                                                                                                                                                                                                                                                                                                                                                                                                                                                                                                                                                                                                                                                                                                                                                                                                                                                                                                            |
| Manuscript ID                   | bmjopen-2020-043409.R1                                                                                                                                                                                                                                                                                                                                                                                                                                                                                                                                                                                                                                                                                                                                                                                                                                                                                                                                                                                                                                     |
| Article Type:                   | Original research                                                                                                                                                                                                                                                                                                                                                                                                                                                                                                                                                                                                                                                                                                                                                                                                                                                                                                                                                                                                                                          |
| Date Submitted by the Author:   | 28-Dec-2020                                                                                                                                                                                                                                                                                                                                                                                                                                                                                                                                                                                                                                                                                                                                                                                                                                                                                                                                                                                                                                                |
| Complete List of Authors:       | De Leo, Diego; Griffith University, Goodfellow, Benjamin; Australian Institute of Suicide Research and Prevention, ; centre hospitalier albert bousquet, psychiatrie générale Silverman, Morton; Medical College of Wisconsin Berman, Alan; Johns Hopkins School of Medicine, Department of Psychiatry and Behavioral Sciences Mann, John; Columbia University Arensman , Ella ; National Suicide Research Foundation, School of Public Health Hawton, Keith; Centre for Suicide Research, Oxford University, Psychiatry Phillips, M. R.; Shanghai Jiao Tong University, Shanghai Mental Health Center; Columbia University, Departments of Psychiatry and Epidemiology Vijayakumar , Lakshmi ; Voluntary Health Services, Department of Psychiatry; Dr Andriessen, Karl; The University of Melbourne, Centre for Mental Health, Melbourne School of Population and Global Health Chavez-Hernandez, Ana-Maria; University of Guanajuato Heisel, Marnin; University of Western Ontario, Department of Psychiatry Kolves, Kairi; Griffith University, AISRAP |
| <b>Primary Subject Heading</b>: | Mental health                                                                                                                                                                                                                                                                                                                                                                                                                                                                                                                                                                                                                                                                                                                                                                                                                                                                                                                                                                                                                                              |
| Secondary Subject Heading:      | Mental health                                                                                                                                                                                                                                                                                                                                                                                                                                                                                                                                                                                                                                                                                                                                                                                                                                                                                                                                                                                                                                              |
| Keywords:                       | Suicide & self-harm < PSYCHIATRY, EPIDEMIOLOGY, MENTAL HEALTH                                                                                                                                                                                                                                                                                                                                                                                                                                                                                                                                                                                                                                                                                                                                                                                                                                                                                                                                                                                              |
|                                 |                                                                                                                                                                                                                                                                                                                                                                                                                                                                                                                                                                                                                                                                                                                                                                                                                                                                                                                                                                                                                                                            |

SCHOLARONE™  
Manuscripts



I, the Submitting Author has the right to grant and does grant on behalf of all authors of the Work (as defined in the below author licence), an exclusive licence and/or a non-exclusive licence for contributions from authors who are: i) UK Crown employees; ii) where BMJ has agreed a CC-BY licence shall apply, and/or iii) in accordance with the terms applicable for US Federal Government officers or employees acting as part of their official duties; on a worldwide, perpetual, irrevocable, royalty-free basis to BMJ Publishing Group Ltd ("BMJ") its licensees and where the relevant Journal is co-owned by BMJ to the co-owners of the Journal, to publish the Work in this journal and any other BMJ products and to exploit all rights, as set out in our [licence](#).

The Submitting Author accepts and understands that any supply made under these terms is made by BMJ to the Submitting Author unless you are acting as an employee on behalf of your employer or a postgraduate student of an affiliated institution which is paying any applicable article publishing charge ("APC") for Open Access articles. Where the Submitting Author wishes to make the Work available on an Open Access basis (and intends to pay the relevant APC), the terms of reuse of such Open Access shall be governed by a Creative Commons licence – details of these licences and which [Creative Commons](#) licence will apply to this Work are set out in our licence referred to above.

Other than as permitted in any relevant BMJ Author's Self Archiving Policies, I confirm this Work has not been accepted for publication elsewhere, is not being considered for publication elsewhere and does not duplicate material already published. I confirm all authors consent to publication of this Work and authorise the granting of this licence.

# International Study of Definitions of English-Language Terms for Suicidal Behaviors ©: Study Results

Diego De Leo<sup>1</sup>, Benjamin Goodfellow <sup>1,2</sup>, Morton M. Silverman<sup>3</sup>, Alan Berman<sup>4</sup>, J. John Mann<sup>5</sup>, Ella Arensman<sup>6</sup>, Keith Hawton<sup>7</sup>, Michael Phillips<sup>8</sup>, Lakshmi Vijayakumar<sup>9</sup>, Karl Andriessen<sup>10</sup>, Ana-Maria Chavez-Hernandez<sup>11</sup>, Marnin Heisel<sup>12</sup>, Kairi Kõlves<sup>1</sup>

1 Australian Institute of Suicide Research and Prevention, World Health Organization Collaborating Centre for Research in Suicide Prevention and Training, Griffith University, Mt Gravatt, Queensland, Australia

2 Centre Hospitalier Albert Bousquet, Nouméa, New Caledonia

3 Medical College of Wisconsin, Milwaukee, Wisconsin, USA

4 Department of Psychiatry and Behavioral Sciences, Johns Hopkins School of Medicine, Baltimore, MD, USA

5 Departments of Psychiatry and Radiology, Columbia University, New York, USA

6 National Suicide Research Foundation & School of Public Health, University College Cork, Cork, Ireland

7 Centre for Suicide Research, University of Oxford, United Kingdom

8 Suicide Research and Prevention Center, Shanghai Mental Health Center, Shanghai, China

9 Department of Psychiatry, Voluntary Health Services, Chennai, India

10 Centre for Mental Health, School of Population and Global Health, University of Melbourne, Melbourne, Victoria, Australia

11 Department of Psychology, University of Guanajuato, Guanajuato, Mexico

12 Department of Psychiatry, The University of Western Ontario, London, Ontario, Canada; University of Rochester Center for the Study and Prevention of Suicide, Rochester, New York, USA

Corresponding author:

Professor Diego de Leo

Australian Institute of Suicide Research and Prevention, World Health Organization Collaborating Centre for Research in Suicide Prevention and Training, Griffith University, Mt Gravatt, Australia.

Phone: +6137353380

E-mail: d.deleo@griffith.edu.au

## Abstract

**Objectives:** Explore international consensus on nomenclatures of suicidal behaviours and analyse differences in terminology between High Income Countries (HICs) and Low-Middle Income Countries (LMICs).

**Design:** An online survey of the members of the International Organisation for Suicide Prevention (IASP) explored the four dimensions of the definition of suicidal behaviour (i.e. outcome, intent, knowledge and agency) using a set of single answer questions and vignettes.

**Setting:** International.

**Participants:** Sample consisted of 126 participants from 63 countries/ territories including 40 IASP national representatives (65% response rate) and 80 IASP regular members (20% response rate). Three more countries were identified – respectively - by two people designated by the WPA and one by the WONCA. Another three participants were eventually identified by the Australian Institute for Suicide Research and Prevention. Thirty of the participating countries/territories were LMICs, represented by 37 individuals, and 33 were HICs, including 89 individuals.

**Outcome measures:** Definitions of English-language terms for suicidal behaviours.

**Results:** The definition of 'suicide' resulting from the survey evidenced a preference for involving an act initiated and carried out by the actor itself. The definition of 'suicide attempt' resulted most often restricted to acts with intent to die, whereas 'self-harm' more broadly referred to acts with varying motives, including the wish to die. The meaning of 'suicidal ideation', 'death wishes', and 'suicide plan' was shared almost universally among respondents. 'Aborted' and 'interrupted suicide attempt' were not meant to be included in the definition of 'preparatory suicidal behaviour'. There were a number of differences between representatives from HICs and LMICs.

**Conclusion:** This international opinion survey provided the basis for a tentative nomenclature of suicidal behaviour shared trans-culturally. Future developments of this nomenclature should be tested in larger samples of professionals, with attention to intercultural and interdisciplinary representativeness for which the involvement of LMICs may be a challenge.

1  
2  
3 **'Strengths and limitations of this study'**  
4

5 This study is the first attempt to assemble opinions from a wide range of countries and professional  
6 backgrounds on the subject of definitions of suicidal behaviours. The main limitations are the relatively  
7 low participation rate, the fact that it was restricted to the English language, and the differential in  
8 representation between HICs and LMICs.  
9  
10  
11  
12  
13

14 **Key words:** definition, terminology, nomenclature, classification, suicide, suicidal behaviour  
15  
16  
17  
18  
19  
20  
21  
22  
23  
24  
25  
26  
27  
28  
29  
30  
31  
32  
33  
34  
35  
36  
37  
38  
39  
40  
41  
42  
43  
44  
45  
46  
47  
48  
49  
50  
51  
52  
53  
54  
55  
56  
57  
58  
59  
60

For peer review only

## Introduction

An important limitation to the generalization of suicide research outcomes is the absence of international consensus on terminologies and definitions, making it difficult to compare interpretations and categories of suicidal behaviour among studies originating in different parts of the world. Attempts at developing a nomenclature for suicidal behaviours (e.g.,<sup>1-3</sup>) have not reached international consensus.<sup>4</sup> Several classifications of suicidal behaviours have also been developed and some were based on the noted nomenclatures.<sup>5</sup> To date, the only classification validated by the World Health Organization (WHO) is a classification restricted to methods of self-harm.<sup>6</sup> To our knowledge, there are no previous surveys focussing on reaching consensus on a nomenclature of suicidal behaviours. Therefore, the International Association for Suicide Prevention (IASP) has constituted a Special Interest Group for the development of an internationally applicable nomenclature of suicidal behaviours.<sup>7</sup>

According to official mortality statistics, 793,000 people worldwide died by suicide in 2016; 79% of these cases were from low-and-middle-income (LMIC) countries,<sup>8</sup> whilst most research outputs on suicidal behaviour are produced in high-income countries (HIC). Furthermore, most definitions and terms of common use originate from HIC.<sup>9</sup> However, since LMICs are increasingly producing research efforts, it would be important to obtain a clearer picture of the definitions and terms used around the world.

This article presents the results of the International Study of Definitions of English-Language Terms for Suicidal Behaviors (ISDELTSB), which aimed to assemble a minimum set of commonly understood and widely used terms and definitions to describe suicidal phenomena.<sup>10</sup> Furthermore, we explore differences in preferred terminologies between HICs and LMICs.

## Methodology

The ISDELTSA methodology was based on a survey of members of international organisations having interest in the study and prevention of suicide, namely the IASP, the World Psychiatric Association (WPA), and the World Organization of National Colleges, Academies and Academic Associations of General Practitioners/Family Physicians' (WONCA), with an effort to recruit from the widest possible range of countries. An initial sample was built with one representative per country.<sup>10</sup> These individuals were expected to provide answers that were representative of the views of professionals working in their country. However, the initial call to national delegates of IASP and members of the other associations resulted in a small number of recruits. It was therefore decided to widen the study sample by inviting all IASP members to participate, assuming that their interest in suicide prevention could be paralleled by a degree of knowledge in the field of suicide higher than that of lay people. Consequently, each participating country had either one 'expert' (i.e., an IASP national representative, or a member of WPA or WONCA), or at least one IASP member. All procedures were approved by the Griffith University's Human Research Ethics Committee (2017/601).

The survey questionnaire proposed a variety of terms and definitions commonly found in the literature. Details about the questionnaire and other details about methodology are presented in an open access journal.<sup>10</sup>

## Sample characteristics

Data were collected in 2018. Initially, as said, participants comprised only IASP national representatives; among the 62 existing national delegates of the association, 40 agreed to join the study. Three more countries were identified – respectively - by two people designated by the WPA and one by the WONCA. Another three participants were eventually identified by the staff of Australian Institute for Suicide Research and Prevention's (AISRAP) among those countries with no IASP delegate.



1  
2  
3 In this way, representatives from 46 countries took part to the study. To further increase the number  
4 of participants, invitation to join the study was extended to all members of IASP. Out of 408 IASP  
5 regular members (excluding national delegates), 80 agreed to take part in the study, bringing to 126  
6 the final number of consenting participants (80 'new' participants plus the 46 previously recruited).  
7  
8 With this operation, the number of countries with at least one representative rose to 63 (countries or  
9 territories). The list and the map of participating countries are available in Supplementary Table (ST) 1  
10 and Supplementary Figure (SF) 1.  
11  
12

13  
14  
15  
16  
17  
18  
19  
20  
21  
22  
23  
24  
25  
26  
27  
28  
29  
30  
31  
32  
33  
34  
35  
36  
37  
38  
39  
40  
41  
42  
43  
44  
45  
46  
47  
48  
49  
50  
51  
52  
53  
54  
55  
56  
57  
58  
59  
60

Thirty of the participating countries or territories were LMICs, represented by 37 individuals. The thirty-three other countries were HICs, represented by 89 individuals. English language was spoken in 23 out of 63 countries. Sixty-one participants were from a country in which no English is spoken, whilst 65 participants were from a country in which English is the official language or one of the official languages. Concerning professional background of participants, 30% were medical doctors, 29% were psychologists, 10% were epidemiologists, and 31% were from 'other' professions (e.g., social worker, student, sociologist, public health professional, teacher etc).

### ***Patient and public involvement***

No patient involved.

### ***Statistical analyses***

Statistical analyses were performed using IBM SPSS Version 25.0. Our focus was on the most used terms. Analyses used odds ratios (OR) with 95% confidence intervals (95%CI) to compare HICs vs. LMICs. There was limited missing data (0-6.3%), which was left out from the analyses of specific item. To enable country-based analyses, we conducted sensitivity analyses by calculating weights for countries where there were more than one respondent, which allowed also more even comparison between HICs and LMICs.

## Results

### *Definition of suicide*

Agreement on the definition of suicide was assessed by providing a set of statements for each of the main components of the definition of suicide - i.e., outcome, intent, knowledge, and agency.<sup>4</sup> Respondents had to choose the suggestion with which they agreed. The choices of respondents by LMICs vs. HICs are shown in Figure 1.

- Please, insert Figure 1

Majority (81.6%; 1 missing) agreed that, "Suicide is an act that necessarily leads to death". Regarding intent, five non-mutually exclusive statements were proposed (Figure 1). More than half of respondents agreed with the last statement (5: "Suicide is an act that may be done without explicit intent to die"). However, respondents agreed more frequently with statements 2-4 (2: "Suicide is an act that may be done with an intent other than an explicit intent to die"; 3: "Suicide is an act that may be done with an ambiguous or unclear intent"; 4: "Suicide is an act that may be done with an intent to take the risk of dying"). Respondents from HIC were more likely to choose statement 3 (OR:2.35; 95%CI: 1.03-5.36), but also in the LMIC group almost 60% of respondents agreed with this statement.

In terms of knowledge of the consequences of the act, four statements were proposed. More than half the respondents agreed with the statement: "Suicide is an act that can be performed with the knowledge of a fatal result, but the person is not certain of that result", regardless of national income. Regarding agency, more than half (60%; 1 missing) of respondents agreed with the statement, "Suicide is an act that is initiated by oneself, but not necessarily carried out by oneself to the end of the action".

### Definition of non-fatal forms of suicidal behaviours

For non-fatal suicidal behaviours, a vignette method was used and a set of 16 basic clinical scenarios was proposed. For each vignette, a list of terms was proposed from which respondents had to choose a single answer. The percentages of agreement with particular terms for vignettes 1-16 according to respondents' countries' national income are presented in Figures 2 and 3.

Vignette 1 asked respondents how they would name the act of a person who harmed him- or her-self with the intention to die but survived. The majority of respondents (92.1%) named the act as a 'suicide attempt' (Figure 2). Vignette 2 described a person who harmed him- or her-self without any intention to die and survived. The answers were not unanimous; however, the highest agreement was reached for the term 'self-harm' (27.8%), followed by non-suicidal self-injury' (NSSI; 19%) and 'deliberate self-harm' (17.5%). Vignette 3 described a person who harmed him- or her-self without any intention to die but died. The highest level of agreement was reached for 'suicide' (24.0%), although 'accident' was also a frequent choice (17.6%).

- Please, insert Figure 2

Vignette 4 asked respondents to define the act of a person who harmed him- or her-self, but, for whatever reasons, could not state his or her intentions and the person survived. While a 'suicide attempt' was the most frequent choice for LMIC (37.8%), HICs chose 'self-harm' most frequently (21.8%; OR:0.40; 95%CI: 0.17-0.93; 2 missing). Vignette 5 described a person who harmed him- or her-self but *did not want* to state his or her intentions and the person survived. The closest levels of agreement between income groups were for 'suicide attempt' (27.4%) even though the HIC group chose 'self-harm' most frequently (26.4%).

1  
2  
3 Vignette 6 asked respondents to define the act of a person who died as a consequence of harming him  
4 or her-self, but his or her intentions in doing so could not be known or inferred. Two answers stood  
5 out: 'suicide' (42.1%) and 'undetermined death' (31.7%). Respondents from HICs were more likely to  
6 choose 'undetermined death' (HICs: 37.1% vs. LMICs: 18.9%; OR:2.53; 95%CI: 1.00-6.39), and  
7 respondents from LMICs 'suicide' (HICs: 37.1% vs. LMICs: 54.1%; OR:0.50; CI 95%: 0.23-1.09).

8  
9  
10 Vignette 7 described someone who occasionally thought of suicide when feeling distressed: all groups  
11 chose 'suicidal ideation' most frequently (64.8%). Vignette 8 described someone who continuously  
12 thought of suicide but had no suicidal intent. All groups chose 'suicidal ideation' most frequently  
13 (45.2%), followed by 'persistent suicidal ideation' (31%).

14  
15 Figure 3 shows respondents' answers to vignettes 9 to 16 according to income level. Vignette 9  
16 described someone who hoped for death but had no thoughts of killing him- or her-self. Respondents  
17 chose 'death wishes' (57.6%) most frequently across all groups. Vignette 10 described someone who  
18 hoped for death by killing him- or her-self, and most respondents chose the 'suicidal ideation' (61.6%)  
19 followed by 'active suicidal ideation' (32%).

20  
21  
22  
23  
24  
25  
26  
27  
28  
29  
30  
31  
32  
33  
34  
35  
36  
37  
38  
39  
40 - Please, insert Figure 3  
41  
42  
43  
44  
45

46 The following vignettes described behaviours that could be considered as being at the boundary  
47 between behaviour and ideation and could therefore be subject to debate. Vignette 11 asked  
48 respondents to choose a term for someone who stated suicidal intention without engaging in the  
49 behaviour. Although all groups most frequently decided that the person was experiencing 'suicidal  
50 ideation' (56.9% for all), HICs' respondents were more likely to choose 'suicidal ideation' than LMICs  
51 (HICs:63.6%, LMICs:40%; OR:2.63; 95%CI: 1.18-5.87; 3 missing).

1  
2  
3 Vignette 12 described someone who mimicked (i.e. acted in a way that had the appearance of) suicidal  
4 behaviour without sustaining any injuries. The two most frequently chosen answers were 'suicidal  
5 behaviour' (35.6%) and 'suicide threat' (19.5%). However, HICs' respondents were more likely to  
6 choose 'suicidal behaviour' (HICs: 63.6% vs. LMICs: 40%; OR:4.32; 95%CI: 1.52-12.26; 8 missing).  
7

8  
9  
10  
11 Vignette 13 asked the respondent to define the behaviour of someone who had decided how and when  
12 to perform a suicidal act, but did not actively prepare anything. The 'suicide plan' was most commonly  
13 chosen (67.5%). Vignette 14 described someone who prepared a suicidal act (e.g. assembled pills,  
14 bought a gun, attached a rope, visited a bridge), but did not initiate it and consequently did not sustain  
15 any injuries. The two most frequently chosen options were 'preparatory suicidal behaviour' (42.6%)  
16 and 'suicide plan' (34.4%). HICs' respondents were more likely to choose 'preparatory suicidal  
17 behaviour' (HICs: 48.9% vs. LMICs: 26.5%; OR:2.65; 95%CI: 1.11-6.33; 4 missing) and the LMIC group  
18 chose 'suicide plan' most frequently (HICs: 34.1% vs. LMICs: 35.3%).  
19  
20  
21  
22  
23  
24  
25  
26  
27  
28

29  
30 Vignette 15 asked the respondent to define the behaviour of someone who initiated a suicidal act (e.g.  
31 stood or sat on the edge of a high bridge, tied a rope around his or her neck), but stopped him- or her-  
32 self before sustaining any injury. The 'aborted suicide attempt' was the most commonly chosen option  
33 (33.1%) followed by the 'suicide attempt' (19%). The HIC group chose the 'aborted suicide attempt'  
34 most frequently (HICs: 37.9% vs. LMICs: 20.6%; OR:2.65; 95%CI: 1.11-6.33; 5 missing) whereas the LMIC  
35 group chose 'suicide attempt' (HICs: 14.9% vs. LMICs: 29.4%; OR: 2.36; 95%CI: 0.92-6.02; 5 missing).  
36  
37  
38  
39  
40  
41  
42  
43

44 Vignette 16 described someone who initiated a suicidal act (e.g. stood or sat on the edge of a high  
45 bridge, tied a rope around his or her neck), but was stopped by someone else before sustaining any  
46 injuries. The majority agreed on the 'interrupted suicide attempt' (58.7%), followed by the 'suicide  
47 attempt' (27.3%).  
48  
49  
50  
51  
52

### 53 *Sensitivity analyses*

54  
55  
56  
57 Change into country-based analysis did not show changes in the most commonly chosen item; in  
58 general, the change remained within +/- 10% (ST 2 & 3). Comparisons between HICs and LMICs showed  
59  
60

1  
2  
3 some changes in the order. For Vignettes 5 and 6, the most commonly chosen item by HICs changed  
4  
5 into the same as in LMICs and for Vignette 3 and 14, the LMICs most predominant item became more  
6  
7 similar to HICs (SF 2-4).  
8  
9

## 10 11 12 13 14 **Discussion**

15  
16 To our knowledge, the ISDELTSB is the first empirical study aiming to assemble a minimum set of  
17  
18 commonly understood and widely used terms and definitions to describe suicidal phenomena. The  
19  
20 results of the present study could give a contribution in this direction, while also looking at differences  
21  
22 between HICs and LMICs regarding terminologies used. The answers of survey participants regarding  
23  
24 the four characteristics of the definition of suicide could delineate some level of consensus. Regarding  
25  
26 outcome, all respondents agreed that *suicide is an act resulting in death*. This sets a clear distinction  
27  
28 between suicide and non-fatal suicidal behaviours and corresponds to the majority of definitions of  
29  
30 suicide found in the literature.<sup>10</sup>  
31  
32  
33

34  
35 Regarding intent, more than half of respondents agreed that suicide could be undertaken *without*  
36  
37 explicit intent to die. Indeed, only a few definitions of suicide did not mention intent to die as a central  
38  
39 characteristic of the act.<sup>1,11,12</sup> In De Leo et al.'s<sup>6</sup> definition, intent targeted "wanted changes" (p. 12).  
40  
41 These authors argued that intent to die - assumed to be at least in minimal part present (greater than  
42  
43 zero) - can be concurrent with other purposes, and that people attempting suicide may even be trying  
44  
45 to improve their life or have other underlying motives, such as escaping from an unbearable situation.  
46  
47 According to the answers to our survey, *suicide is an act in which intent may not be explicit but*  
48  
49 *ambiguous and unclear, and involving the risk of dying*.  
50  
51  
52

53  
54 In literature, knowledge of potentially fatal outcome was often suggested as a requirement for the  
55  
56 definition of suicide.<sup>9,13</sup> In the present survey, according to the vast majority of respondents, *suicide is*  
57  
58 *an act carried out with the knowledge of a potentially fatal result*.  
59  
60

1  
2  
3 The respondents stressed the importance of distinguishing suicide from assisted suicide and  
4  
5 euthanasia. Generally, they expressed the choice for a definition excluding the possibility of an outside  
6  
7 agent. This appears in contradiction with most literature (e.g.,<sup>9</sup>). According to most respondents in this  
8  
9 study, *suicide is an act initiated and carried out by oneself to the end of the action*. However, in our  
10  
11 view, if widely accepted, this determination could lead to several problems, bringing to a substantial  
12  
13 underestimation of suicide mortality. For instance, an act in which a person stands in front of a moving  
14  
15 object (e.g., a train or a truck driven by another person) could hardly be considered as *assisted suicide*.  
16  
17 Keeping in mind the limitations of the present survey (e.g., representativeness of the sample; clarity  
18  
19 of vignettes; deepening of details, etc.), the indications coming from this area of our study seem to  
20  
21 emphasize the importance of a shared set of definitions among scholars in the field of suicide. The  
22  
23 discrepancy detected at the level of definition of suicide among study participants is of relevance and  
24  
25 underlines the appropriateness of research efforts in the definitional domain. Indeed, if we identify  
26  
27 what varies and explain why, we should equally succeed in identifying what does not, i.e., shared terms  
28  
29 and definitions. Further research should thus use the same methodology and focus on a wider sample  
30  
31 of professionals working in the field.  
32  
33  
34  
35

36  
37 Evidence of intent to die is central to the definition of 'suicide attempt', a behaviour in which *a person*  
38  
39 *harms him- or her-self, with the intention to die, and survives*, in agreement with existing literature.<sup>1,2,14</sup>  
40

41  
42 The term 'suicide attempt' was deemed acceptable in a wide scale survey and recommended for  
43  
44 academic and media use.<sup>15</sup> 'Self-harm' was the preferred term in cases in which there was no evidence  
45  
46 of intent to die (i.e., vignette 2) and elicited less disagreement than 'suicide attempt' when intent could  
47  
48 not be determined (i.e., vignettes 4 and 5). In the literature, 'self-harm' and 'deliberate self-harm' have  
49  
50 been described either in absence of suicidal intent<sup>3,16,17</sup> or regardless of suicidal intent.<sup>18,19</sup> The term  
51  
52 '*deliberate self-harm*' was not favoured in respondents' answers; their comments suggested that it  
53  
54 could be stigmatizing. The term 'self-harm' could thus be defined as a *non-fatal act in which a person*  
55  
56 *harms him- or her-self, and intent to die is either absent or not accessible to observation*. The question  
57  
58 remains as to whether this term could be placed in an overarching position in a nomenclature,  
59  
60

1  
2  
3 regardless of the level of intent to die (thus including 'suicide attempt'). Statement of intent differs  
4 depending on the person interviewed (e.g., patient, family, or clinician) and timing of the interview  
5 (e.g., intent to die could be masked or denied when the patient becomes aware of the possibility of  
6 being admitted to a locked inpatient unit). For example, Kapur et al.<sup>20</sup> argued against distinguishing  
7 acts of self-harm according to intent.  
8  
9  
10  
11  
12

13  
14  
15 On the basis of this survey results, if intent to die has been stated by the patient, it may be more  
16 appropriate to consider the term 'suicide attempt' rather than 'self-harm', even if it seems to  
17 contradict the definition of suicide coming out from this survey. One could have imaged another term  
18 for fatal suicidal behaviour where evidence is not clear (e.g., 'fatal self-harm'); however, respondents  
19 did not suggest any specific term for this specific situation.  
20  
21  
22  
23  
24  
25

26  
27 Regarding 'suicidal ideation', Silverman et al.<sup>7</sup> distinguished between 'no ideation' vs. 'undetermined  
28 degree' vs. 'some suicidal intent', and further subdivided the categories into 'casual', 'transient',  
29 'passive', 'active', and 'persistent'. The responses to our survey suggest a rather inclusive definition of  
30 'suicidal ideation': *Thinking of suicide with or without suicidal intent; hoping for death by killing oneself;*  
31 *and, stating the presence of suicidal intention without engaging in behaviour.* Further research may  
32 consider sub-dividers such as *with/without suicidal intent, transient, reactive, persistent, or with*  
33 *communication.*  
34  
35  
36  
37  
38  
39  
40  
41  
42

43 'Death wishes' were defined by respondents as *hoping for death without thoughts of killing oneself,*  
44 and were less inclusive than Balaguer et al.'s<sup>21</sup> 'wish to hasten death', which was an overarching  
45 category including suicidal ideation.  
46  
47  
48  
49

50  
51 O'Carroll et al.<sup>6</sup> defined 'suicide threat' as *"any interpersonal action, verbal or nonverbal, stopping*  
52 *short of a directly self-harmful act that a reasonable person would interpret as communicating or*  
53 *suggesting that a suicidal act or other suicide-related behaviour might occur in the near future"* (p.  
54 247). Silverman et al.<sup>7</sup> defined this term in a similar way. Vignette 12 was a case scenario designed to  
55  
56  
57  
58  
59  
60



1  
2  
3 illustrate this definition. However, many participants did not respond to this vignette, and the  
4  
5 significant disagreement between groups should lead to caution in interpreting results.  
6  
7

8 Based on responses to our survey, a 'suicide plan' could be defined as *having decided how and when*  
9  
10 *to perform a suicidal act*. This definition is comparable to that of Silverman et al.,<sup>7</sup> which does not  
11  
12 include preparatory behaviour. A suggested definition should thus exclude *active preparation*.  
13  
14

15  
16 Despite some disagreement between respondents, 'preparatory suicidal behaviour' could be defined  
17  
18 as *preparing for a suicidal act (e.g. collecting pills, buying a gun, attaching a rope, visiting a bridge),*  
19  
20 *but without initiating it and thus not sustaining any injury*. This definition is similar to that given by  
21  
22 Posner et al.<sup>22</sup> However, these authors also considered 'aborted' and 'interrupted suicide attempt' and  
23  
24 thus a *preparatory act* was an umbrella term, which was not the case for our survey. Based on results,  
25  
26 an 'aborted suicide attempt' could be defined as an act in which a person *initiates a suicidal act (e.g.*  
27  
28 *stands or sits on the edge of a high bridge; ties a rope around his or her neck; etc.), but stops him/herself*  
29  
30 *before sustaining any injury* (Vignette 15).  
31  
32

33  
34 An 'interrupted suicide attempt' could be defined as *initiating a suicidal act (e.g. standing or sitting on*  
35  
36 *the edge of a high bridge, tying a rope around one's neck), but being stopped by someone else before*  
37  
38 *sustaining any injury* (vignette 16). These definitions are indeed comparable to those reported by  
39  
40 Posner et al.<sup>22</sup>  
41  
42

#### 43 44 *Differences between HICs and LMICs*

45  
46  
47 Access to resources (e.g., local research activity) could have an influence on terminology. Therefore, it  
48  
49 was expected that the level of national income has an influence on preferred terminology of the  
50  
51 respondents considering HICs have more resources for professionals working in suicidology, advanced  
52  
53 health care systems, and more academic and research background than LMICs. Furthermore, there are  
54  
55 notable cultural differences (e.g. religious), which could have further impact on the terminology.  
56  
57  
58 Nevertheless, lack of previous empirical studies did not enable to propose a clear testable hypothesis.  
59  
60

1  
2  
3 However, our results identified some notable differences between respondents from LMICs and HICs.  
4  
5 Respondents from HICs were more likely to agree that, in suicide, intent may be ambiguous or unclear.  
6  
7 Differences in responses to vignette 4 (i.e., non-fatal suicidal behaviour, but person cannot state  
8  
9 intentions) could suggest that respondents from LMICs did not distinguish non-fatal behaviours as  
10  
11 precisely regarding intent as respondents from HICs, who were more likely to name the behaviour  
12  
13 'self-harm.' Interestingly in Vignette 6 (i.e. fatal suicidal behaviour with no evidence of intent),  
14  
15 respondents from HICs were more likely to choose 'undetermined death' rather than 'suicide', which  
16  
17 was somewhat in contradiction with an open definition of suicide regarding intent. Some differences  
18  
19 were found for Vignette 11, 12 and 14, but none of these related to a pattern in which respondents  
20  
21 form HICs had more precise terminology than respondents from LMICs. Overall, no clear differential  
22  
23 pattern could be evidenced in responses given for the four characteristics of suicide, and respondents  
24  
25 from LMICs had an equal range of terms to name the behaviours in the vignettes.  
26  
27  
28  
29  
30  
31  
32  
33

### 34 *Strengths and limitations*

35  
36  
37 Representatives of 63 countries (slightly less than a third of all 193 WHO member countries)  
38  
39 participated in the ISDELTSB. If any nomenclature has to be internationally applicable, efforts should  
40  
41 be dedicated to increasing the number of countries taking part in this type of research, especially  
42  
43 among LMICs. It should be noted that seven out of 30 LMICs (23%) had a national suicide prevention  
44  
45 strategy, compared to 15 out of 33 HICs (45%). Yet, despite their relatively low number, participating  
46  
47 countries account for two thirds of the world population and three quarters of all suicides.<sup>23</sup>  
48  
49  
50

51  
52 LMICs were represented by 37 participants and HICs by 89 participants, which implies a bias towards  
53  
54 responses from HICs and the analysis showed a few notable differences. However, we conducted  
55  
56 additional sensitivity analyses, which gave similar results. Nevertheless, the relatively high number of  
57  
58 LMICs included in the study was achieved by using a recruitment approach based on institutionally-  
59  
60 and self-defined expertise. The fact that there was no operational definition regarding expertise in

1  
2  
3 suicidology is another limitation to our study. However, differences between the HICs are also very  
4  
5 likely.

6  
7  
8 The initial idea of using one 'representative' per country (the IASP national delegate) was chosen to  
9  
10 give comparable weight to all participating countries. The small dimension of this sample brought to  
11  
12 an extension to individual members of IASP. However, the final number of participants remained quite  
13  
14 low; the obtained results need to be replicated in studies with bigger samples.

15  
16  
17 As mentioned in the companion paper on methodology,<sup>3</sup> the questionnaire was not translated into  
18  
19 different languages but presented in English. This has probably limited participation to the study; in  
20  
21 addition, it may have led to discrepancies in understanding questions. We need to acknowledge that  
22  
23 all conclusions should be taken with caution.  
24  
25

### 26 27 28 29 30 31 *Implications for further research*

32  
33  
34 Table 1 collates the most frequently chosen terms together, with their matching definition. The  
35  
36 resulting nomenclature can be considered as an attempt at promoting consensus in a wide range of  
37  
38 cultural settings. It tries to encompass the whole range of suicidal behaviours and ideation. However,  
39  
40 as mentioned above, not everything comes as crystal clear. For example, suicide was frequently  
41  
42 interpreted as an act performed to completion by the actor itself, not involving a third agent. Intent to  
43  
44 die appears as necessary to define a suicide attempt, but intent can be vague or unclear for a suicide.  
45  
46 There are terms that may receive an overarching character. For instance, 'self-harm' may include  
47  
48 behaviours in which there is no intent to die and those in which intent is unknown.  
49  
50

51  
52  
53 The 'preparatory suicidal behaviour' category could include both 'aborted' and 'interrupted suicide  
54  
55 attempt' or, as suggested in our survey, could also be distinct, owing to differences in the moment in  
56  
57 which the behaviour stops (i.e. after preparations are finished or after the suicidal act is initiated).  
58  
59  
60

1  
2  
3 The nomenclature presented in Table 1 should thus be considered as a working base to advance in the  
4  
5 direction of a universal classification of suicidal behaviours.  
6  
7

8 - Please insert Table 1  
9  
10  
11  
12  
13

## 14 **Conclusion**

15  
16  
17 The development of an internationally applicable nomenclature and classification of suicidal  
18 behaviours would be a long and complex process. The IASP Special Interest Group on Nomenclature  
19 would be ideally positioned to carry out this task with the help of a large and motivated international  
20 membership. Using the results of an international opinion survey, a tentative nomenclature of suicidal  
21 behaviour is proposed. Indications from this survey may be utilized by the Special Interest Group.  
22  
23  
24  
25  
26  
27  
28  
29  
30  
31  
32  
33  
34  
35  
36  
37  
38  
39  
40  
41  
42  
43  
44  
45  
46  
47  
48  
49  
50  
51  
52  
53  
54  
55  
56  
57  
58  
59  
60  
61  
62  
63  
64  
65  
66  
67  
68  
69  
70  
71  
72  
73  
74  
75  
76  
77  
78  
79  
80  
81  
82  
83  
84  
85  
86  
87  
88  
89  
90  
91  
92  
93  
94  
95  
96  
97  
98  
99  
100

## Acknowledgements

For their assistance in recruiting participants and distributing the questionnaire we are extremely grateful to IASP Administrative Officers, Wendy Orchard and Wendy Cliff; Professor Roy Abraham Kallivayalil, Secretary General at the WPA, as well as the WPA team; Professor Chris Dowrick, Chair of Working Party for Mental Health at WONCA, as well as the WONCA team. We would also like to acknowledge all those who participated in ISDELTSB ©: Dr Bashir Sarwari, Dr Ernesto Ruben Paez, Dr Jo Robinson, Dr Thomas Niederkrotenthaler, Dr Gwendolyn Portzky, Dr Daravuth Yel, Professor Jie Zhang, Dr Marta Ardilla, Dr Annette Erlangsen, Professor Merike Sisask, Dr Stephane Amadeo, Dr Reinhard Lindner, Professor Charity Akotia, Professor Christos Lionis, Dr Frances Yik Wa Law, Dr Sandor Fekete, Dr Wilhelm Nordfjord, Professor Seyed Kazem Malakouti, Dr Marco Innamorati, Dr Chiaki Kawanishi, Miss Merab Mulindi, Professor Elie Karam, Dr Paulius Skruibis, Mrs Neeteeyavathee Appadoo, Dr Liuba Ceban, Dr Remco De Winter, Dr Sylvia Huitson, Dr Alexandre Teixeira, Dr Linnette Rodriguez Figueroa, Dr. Suhaila Ghuloum, Miss Dana-Cristina Herta, Ms Anna-Lisa Labiche, Dr Vita Postuvan, Mr Andoni Ansean, Dr Gergo Hadlaczky, Assistant Professor Prakarn Thomyangkoon, Dr Puloka Mapa Haano, Professor Gerard Hutchinson, Dr James Mughisha, Professor Vsevolod Rozanov, Dr Bianca Hedge, Professor Madelyn Gould, Dr Silvia Peláez, Dr Alan Apter, Professor Ad Kerkhof, Dr Siegrid Darquet, Professor José Manoel Bertolote, Dr. Benedikt Till, Professor Michel Tousignant, Dr Tracy McCown, Dr M M Jalal Uddin, Professor Øivind Ekeberg, Mr Bronwen Edwards, Dr Priya Sreedaran, Dr Mitsuhiro Yamada, Mrs Karen Lascelles, Professor Jean Pierre Soubrier, Mrs Angela Clapperton, Dr. Tracey King, Dr. Ann Luce, Professor Stephen Platt, Dr Daniel Reidenberg, Mr Dean Martin, Ms Eleanor Bailey, Mr Barry Taylor, Mrs Ann Evans, Mrs Karen Scavacini, Mr Gert Jessen, Mrs Diana Rucli, Dr. Chencho Dorji, Dr Saska Roskar, Dr John Draper, Dr Nathaniel Pollock, Dr Aggrey Burke, Dr Freddy Vasquez, Professor William Feigelman, Mr Sean McCarthy, Luis Miguel Sánchez-Loyo, Mr Andrew Humphreys, Dr Gabriela Silva de Malafaia, Mrs Christine Genest, Professor Chan Lai Fong, Professor Deborah Goebert, Mrs Veronica Rose Marshall Bernard, Mrs. Lakshmi Ratnayeke, Mr Ricardo Gusmão, Professor Chris G. Caulkins, Ms Jill Fisher, Professor Thomas Bronisch, Mr Ernest Garnark

1  
2  
3 Smith Jr., Dr Ellyson Stout, Professor Merete Nordentoft, Dr Zonda Tamás, Mrs Christine Wong, Rev.  
4  
5 Cody Cooper, Dr Pandit Devjyoti Sharma, Mrs Sally Morris, Ms Nicole Hill, Dr Kate Fairweather-Schmidt,  
6  
7 Professor Ping Qin, Professor Ian R.H. Rockett, Dr Maree Inder, Dr Gabrielle Jenkin, Dr Liv Mellesdal,  
8  
9 Mr Thomas Tarurongo Wynne, Mrs Lena Lenehan, Professor Yueqin Huang, Dr Derek de Beurs, Ms  
10  
11 Uzma Irfan, Ms Rosina Acharya. We also thank all those participants who wished to remain  
12  
13 anonymous.  
14  
15

### 16 17 **Funding**

18  
19  
20 None  
21  
22

### 23 **Conflicts of interest**

24  
25 No conflicts to declare.  
26  
27

### 28 **Author contributorship**

29  
30  
31 DDL originated the study idea and design, designed and critically reviewed the questionnaire,  
32  
33 interpreted data and drafted the manuscript. BG helped design the study, designed the questionnaire,  
34  
35 analysed and interpreted data and drafted the manuscript. MS, AB, JM, EA, KH, MP and LV contributed  
36  
37 to the methodology, reviewed the questionnaire, interpretation of data and critically reviewed the  
38  
39 manuscript. KA, AMCH and MH contributed to the interpretation of data and critically reviewed the  
40  
41 manuscript. KK helped design the study, helped design and critically reviewed the questionnaire,  
42  
43 analysed and interpreted data and critically reviewed the manuscript.  
44  
45  
46  
47  
48  
49  
50  
51  
52  
53  
54  
55  
56  
57  
58  
59  
60

## References

1. Beck, A., T., Davis, J., H., Frederick, C., J., Perlin, S., Pokorny, A., D., Schulman, R., E., et al. (1973). Classification and Nomenclature. In H. L. P. Resnik & B. C. Hathorne (Eds.), *Suicide Prevention in the 70's* (pp. 7-12): Center for Studies of Suicide Prevention, National Institute of Mental Health.
2. O'Carroll, P., W., Berman, A. L., Maris, R. W., Moscicki, E. K., Tanney, B. L., & Silverman, M. M. (1996). Beyond the Tower of Babel: a nomenclature for suicidology. *Suicide Life Threat Behav*, 26(3), 237-252.
3. Silverman, M. M., Berman, A. L., Sanddal, N. D., O'Carroll P, W., & Joiner, T. E. (2007). Rebuilding the tower of Babel: a revised nomenclature for the study of suicide and suicidal behaviors. Part 2: Suicide-related ideations, communications, and behaviors. *Suicide Life Threat Behav*, 37(3), 264-277.
4. Goodfellow, B., Kölves, K., & De Leo, D. (2018). Contemporary nomenclatures of suicidal behaviors: a systematic literature review. *Suicide Life Threat Behav*, 48(3), 353-366.
5. Goodfellow, B., Kölves, K., & De Leo, D. (2020). Contemporary classifications of suicidal behavior: a systematic literature review. *Crisis*, 41(3), 179-186.
6. World Health Organization. (2016a). International Classification of Diseases (ICD). Retrieved from: <http://www.who.int/classifications/icd/en/> 26 May 2020
7. Silverman, M. M., & De Leo, D. (2016). Why there is a need for an international nomenclature and classification system for suicide. *Crisis*, 37(2), 83-87.
8. World Health Organization. (2018). National suicide prevention strategies: progress, examples and indicators. (9241515015). Retrieved from: [https://www.who.int/mental\\_health/suicide-prevention/national\\_strategies\\_2019/en/](https://www.who.int/mental_health/suicide-prevention/national_strategies_2019/en/) 21 April 2020
9. Goodfellow, B., Kölves, K., & De Leo, D. (2019). Contemporary definitions of suicidal behavior: a systematic literature review. *Suicide Life-Threat Behav*, 49(2), 488-504.

10. Goodfellow, B., Kölves, K., De Leo, D., Silverman, M., M., Berman, A., Mann, J., et al. (2019). International Study of Definitions and Terms for Suicidal Behaviors ©: Protocol of an opinion survey. *BMJ Open*, 2019; 9:e025770. doi:10.1136/bmjopen-2018-025770.
11. Baechler, J. (1980). A strategic theory. *Suicide Life Threat Behav* 10(2), 70-99.
12. Egel, L. (1999). On the need for a new term for suicide. *Suicide Life Threat Behav*, 29(4), 393-394.
13. De Leo, D., Burgis, S., Bertolote, J. M., Kerkhof, A. J., & Bille-Brahe, U. (2006). Definitions of suicidal behavior: lessons learned from the WHO/EURO multicentre Study. *Crisis*, 27(1), 4-15.
14. Stengel, E. (1964). The suicidal attempt as a behaviour pattern, and its definition. In E. Stengel (Ed.), *Suicide and Attempted Suicide* (pp. 67-73). London: Penguin Books.
15. Padmanathan, P., Biddle, L., Hall, K., Scowcroft, E., Nielsen, E., & Knipe, D. (2019). Language use and suicide: An online cross-sectional survey. *PLoS one*, 14(6), e0217473.
16. Mangnall, J., & Yurkovich, E. (2008). A literature review of deliberate self-harm. *Perspect Psychiatr Care*, 44(3), 175-184.
17. Marusic, A. (2004). Toward a new definition of suicidality? Are we prone to Fregoli's illusion? *Crisis*, 25(4), 145-146.
18. Dear, G. E. (2001). Further comments on the nomenclature for suicide-related thoughts and behavior. *Suicide Life Threat Behav*, 31(2), 234-235.
19. Hawton, K., Harriss, L., Hall, S., Simkin, S., Bale, E., & Bond, A. (2003). Deliberate self-harm in Oxford, 1990–2000: a time of change in patient characteristics. *Psychol Med*, 33(6), 987-995.
20. Kapur, N., Cooper, J., O'Connor, R. C., & Hawton, K. (2013). Non-suicidal self-injury v. attempted suicide: new diagnosis or false dichotomy? *Br J Psychiatry*, 202(5), 326-328.
21. Balaguer, A., Monforte-Royo, C., Porta-Sales, J., Alonso-Babarro, A., Altisent, R., Aradilla-Herrero, A., et al. (2016). An international consensus definition of the wish to hasten death and its related factors. *PLoS one*, 11(1), e0146184.



- 1  
2  
3 22. Posner, K., Oquendo, M. A., Gould, M., Stanley, B., & Davies, M. (2007). Columbia Classification  
4  
5 Algorithm of Suicide Assessment (C-CASA): classification of suicidal events in the FDA's  
6  
7 pediatric suicidal risk analysis of antidepressants. *Am J Psychiatry*, 164(7), 1035-1043.  
8  
9  
10 23. World Health Organization. (2016b). Suicide data. Retrieved from:  
11  
12 [https://www.who.int/mental\\_health/prevention/suicide/suicideprevent/en/](https://www.who.int/mental_health/prevention/suicide/suicideprevent/en/) 26 May 2020  
13  
14 24. Reed, G. M., Mendonca Correia, J., Esparza, P., Saxena, S., & Maj, M. (2011). The WPA-WHO  
15  
16 global survey of psychiatrists' attitudes towards mental disorders classification. *World*  
17  
18 *Psychiatry*, 10(2), 118-131.  
19  
20  
21  
22  
23  
24  
25  
26  
27  
28  
29  
30  
31  
32  
33  
34  
35  
36  
37  
38  
39  
40  
41  
42  
43  
44  
45  
46  
47  
48  
49  
50  
51  
52  
53  
54  
55  
56  
57  
58  
59  
60

Table 1. Nomenclature of suicidal behaviours after the ISDELTSB

| <b>Designating term or expression</b> | <b>Definition</b>                                                                                                                                                                                                                                                                    |
|---------------------------------------|--------------------------------------------------------------------------------------------------------------------------------------------------------------------------------------------------------------------------------------------------------------------------------------|
| <b>Suicide</b>                        | An act resulting in death which is initiated and carried out by an individual to the end of the action, with the knowledge of a potentially fatal result, and in which intent may be ambiguous or unclear, may involve the risk of dying, or may not involve explicit intent to die. |
| <b>Suicide attempt</b>                | An act in which a person harms him- or her-self, with the intention to die, and survives.                                                                                                                                                                                            |
| <b>Self-harm</b>                      | A non-fatal act in which a person harms him- or her-self intentionally, with varying motives including the wish to die.                                                                                                                                                              |
| <b>Suicidal ideation</b>              | To think of suicide with or without suicidal intent, or hope for death by killing oneself, or state suicidal intention without engaging in behaviour.                                                                                                                                |
| <b>Death wishes</b>                   | To hope for death without thoughts of killing oneself.                                                                                                                                                                                                                               |
| <b>Suicide plan</b>                   | To have decided how and when to perform a suicidal act, but without active preparation.                                                                                                                                                                                              |
| <b>Preparatory suicidal behaviour</b> | To prepare a suicidal act (e.g. assemble pills, buy a gun, attach a rope, visit a bridge), but without initiating it and thus not sustaining any injury.                                                                                                                             |
| <b>Aborted suicide attempt</b>        | An act in which a person initiates a suicidal act (e.g. stands or sits on the edge of a high bridge, ties a rope around his or her neck), but stops him/herself before sustaining any injury.                                                                                        |
| <b>Interrupted suicide attempt</b>    | An act in which a person initiates a suicidal act (e.g. stands or sits on the edge of a high bridge, ties a rope around his or her neck), but is stopped by someone else before sustaining any injuries.                                                                             |

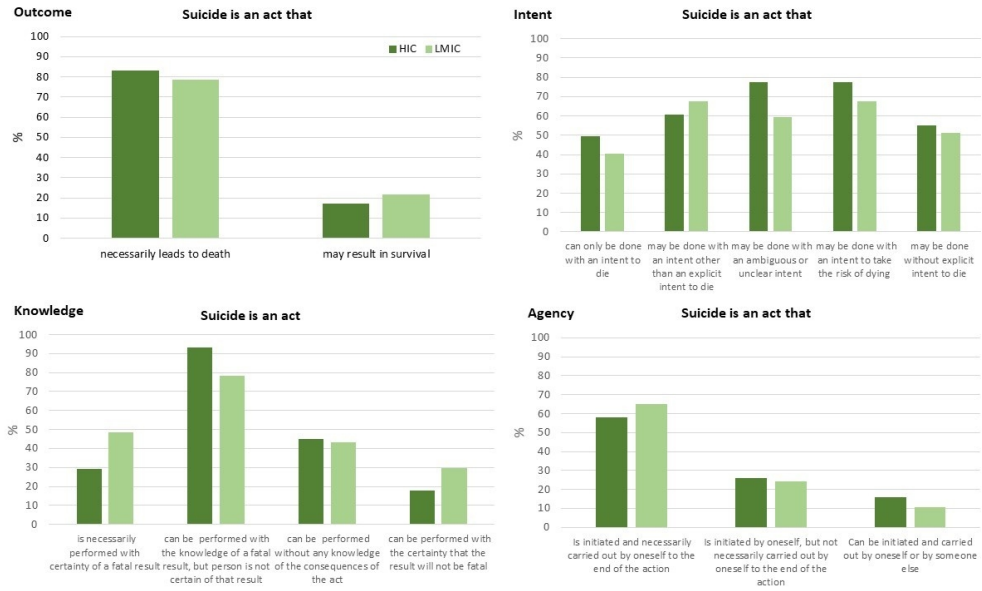

Figure 1. Percentage of respondents who agreed with statements regarding the definition of suicide according to national income in the ISDELTSB sample (HIC=High Income Country; LMIC=Low- and Middle- Income Country)

254x153mm (120 x 120 DPI)

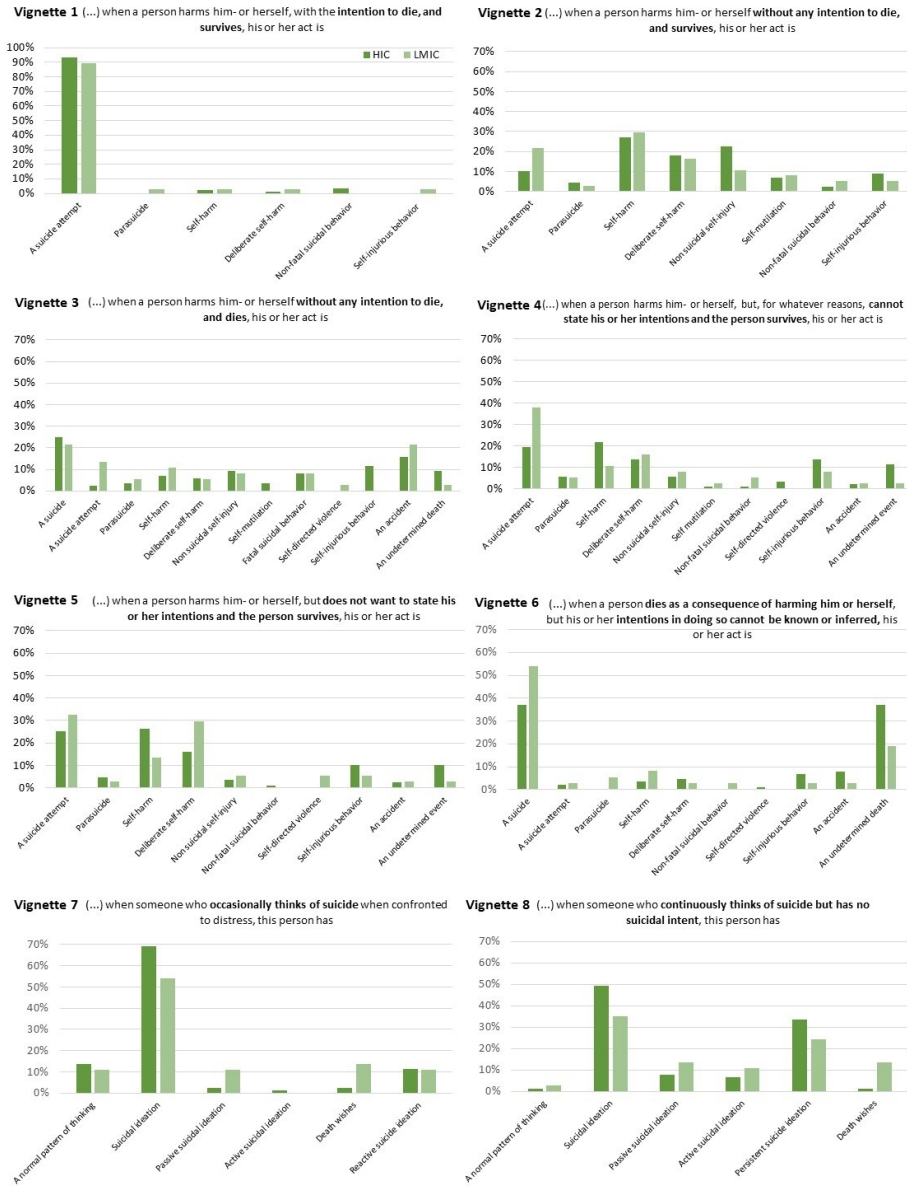

Figure 2. Percentage of respondents agreeing to statements regarding the definition of suicidal behaviours (Vignettes 1-8) by national income in ISDTSB sample (HIC=High Income Country; LMIC=Low- and Middle- Income Country)

237x308mm (120 x 120 DPI)

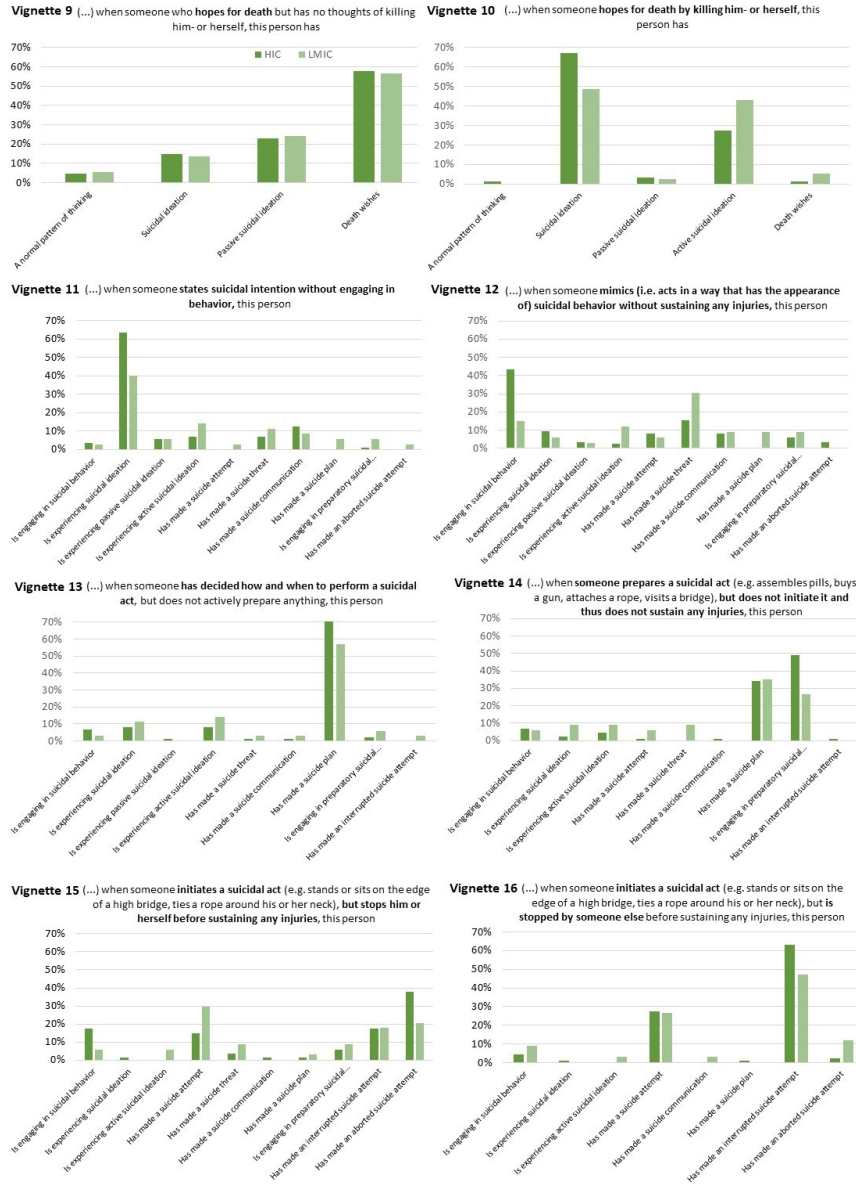

Figure 3. Percentage of respondents agreeing to statements regarding the definition of suicidal behaviours (Vignettes 9-16) by national income in ISDTSB sample (HIC=High Income Country; LMIC=Low- and Middle- Income Country)

236x324mm (120 x 120 DPI)

Supplementary Table 1. Number of respondents by country/territory that participated to the International Study of Definitions and Terms for Suicidal Behaviors ©

| Countries/territories | 'experts' | IASP members |
|-----------------------|-----------|--------------|
| Africa                |           |              |
| Ghana                 | 1         | 0            |
| Kenya                 | 1         | 0            |
| Liberia               | 0         | 1            |
| Mauritius             | 1         | 1            |
| Seychelles            | 1         | 0            |
| Uganda                | 1         | 0            |
| America               |           |              |
| Argentina             | 1         | 0            |
| Brazil                | 0         | 4            |
| Canada                | 1         | 5            |
| Colombia              | 1         | 0            |
| Mexico                | 1         | 1            |
| Peru                  | 0         | 1            |
| Puerto Rico           | 1         | 0            |
| The Bahamas           | 0         | 1            |
| Trinidad and Tobago   | 1         | 0            |
| Uruguay               | 1         | 0            |
| USA                   | 1         | 8            |
| Asia                  |           |              |
| Afghanistan           | 1         | 0            |
| Bangladesh            | 0         | 1            |
| Bhutan                | 0         | 1            |
| Cambodia              | 1         | 0            |
| China                 | 1         | 1            |
| Hong Kong             | 1         | 0            |
| India                 | 0         | 2            |
| Iran                  | 1         | 1            |
| Israel                | 0         | 1            |
| Japan                 | 1         | 1            |
| Lebanon               | 1         | 0            |
| Malaysia              | 0         | 1            |
| Nepal                 | 1         | 0            |
| Pakistan              | 1         | 0            |
| Qatar                 | 1         | 0            |
| Singapore             | 0         | 1            |
| Sri Lanka             | 0         | 1            |
| Taiwan                | 0         | 1            |
| Thailand              | 1         | 0            |
| Europe                |           |              |

|    |                  |    |    |
|----|------------------|----|----|
| 1  | Austria          | 1  | 1  |
| 2  | Belgium          | 1  | 1  |
| 3  | Denmark          | 1  | 2  |
| 4  | Estonia          | 1  | 0  |
| 5  | France           | 0  | 2  |
| 6  | Germany          | 1  | 1  |
| 7  | Greece           | 1  | 0  |
| 8  | Hungary          | 1  | 1  |
| 9  | Iceland          | 1  | 0  |
| 10 | Ireland          | 0  | 3  |
| 11 | Italy            | 1  | 1  |
| 12 | Lithuania        | 1  | 0  |
| 13 | Moldova          | 1  | 0  |
| 14 | Netherlands      | 1  | 2  |
| 15 | Norway           | 0  | 3  |
| 16 | Portugal         | 1  | 1  |
| 17 | Romania          | 1  | 0  |
| 18 | Slovenia         | 1  | 1  |
| 19 | Spain            | 1  | 0  |
| 20 | Sweden           | 1  | 1  |
| 21 | UK               | 0  | 4  |
| 22 | Ukraine          | 1  | 0  |
| 23 | Oceania          |    |    |
| 24 | Australia        | 1  | 15 |
| 25 | New Zealand      | 1  | 6  |
| 26 | Cook Islands     | 0  | 1  |
| 27 | French Polynesia | 1  | 0  |
| 28 | Tonga            | 1  | 0  |
| 29 | Total            | 46 | 80 |

1  
2  
3  
4  
5  
6  
7  
8  
9  
10  
11  
12  
13  
14  
15  
16  
17  
18  
19  
20  
21  
22  
23  
24  
25  
26  
27  
28  
29  
30  
31  
32  
33  
34  
35  
36  
37  
38  
39  
40  
41  
42  
43  
44  
45  
46  
47  
48  
49  
50  
51  
52  
53  
54  
55  
56  
57  
58  
59  
60

Supplementary Figure 1: Participating countries in the International Study of Definitions and Terms of Behavior

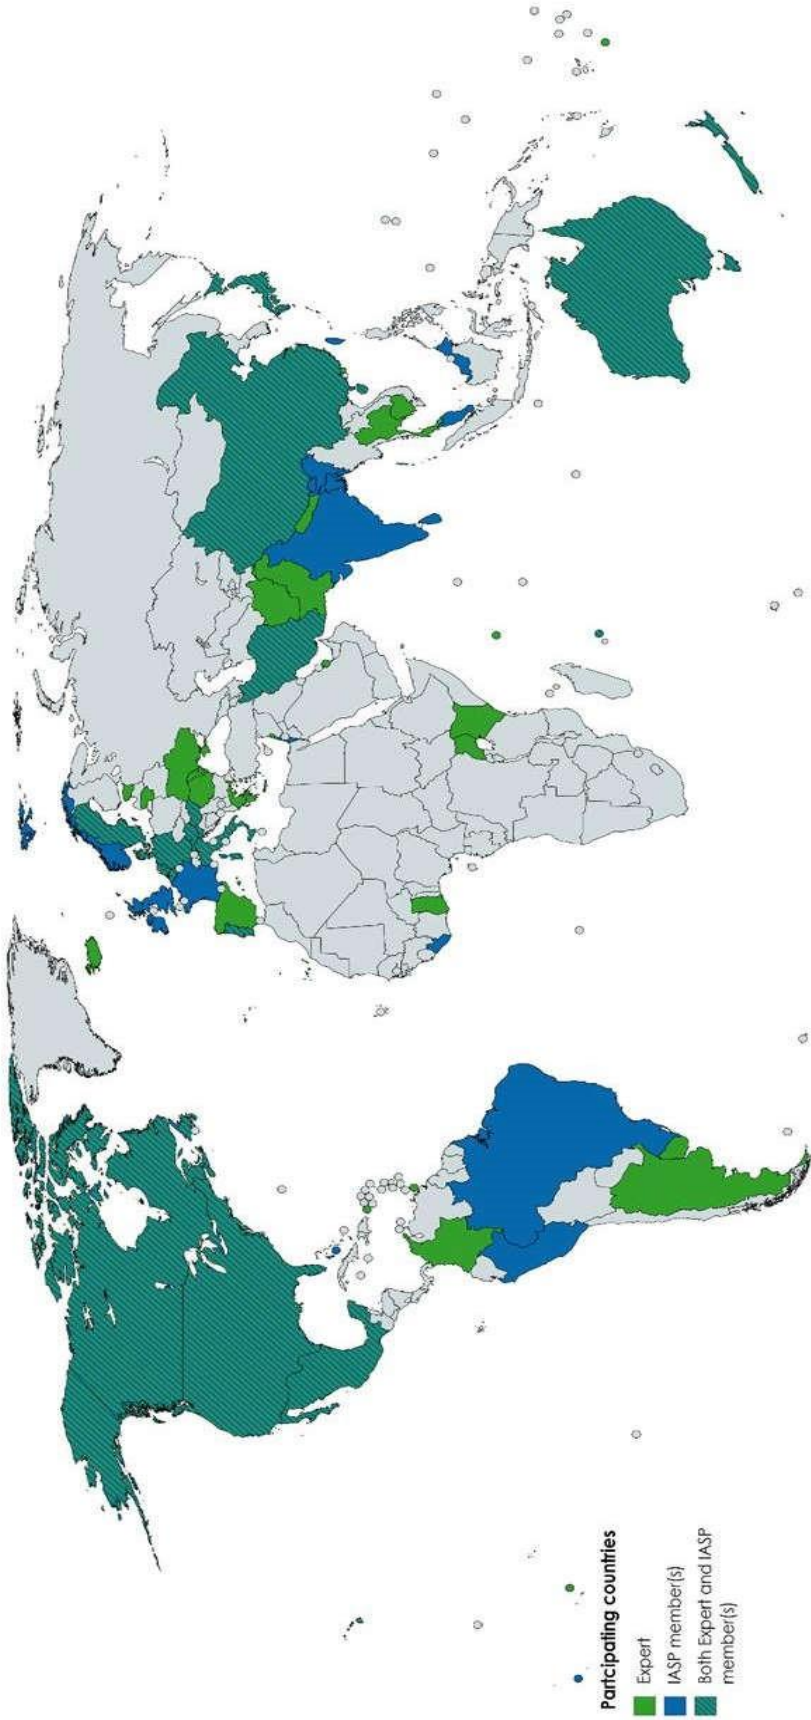

Created with mapchart.net ©



Supplementary Table 2. Individual and country-based results by main components of suicide definition

|                                                                                                                        | Individual based |       | Country based* |                   |
|------------------------------------------------------------------------------------------------------------------------|------------------|-------|----------------|-------------------|
|                                                                                                                        | N                | %     | N              | %                 |
| <b>Outcome (one item)</b>                                                                                              |                  |       |                |                   |
| Suicide is an act that necessarily leads to death                                                                      | 102              | 81.6% | 52             | 81.7%             |
| ... may result in survival                                                                                             | 23               | 18.4% | 11             | 18.2%             |
| Missing                                                                                                                | 1                |       | 0              |                   |
| <b>Intent (five separate items)</b>                                                                                    |                  |       |                |                   |
| Suicide is an act that can only be done with an intent to die                                                          | 59               | 46.8% | 26             | 41.7%             |
| Suicide is an act that may be done with an intent other than an explicit intent to die                                 | 79               | 62.7% | 44             | 69.4%             |
| Suicide is an act that may be done with an ambiguous or unclear intent                                                 | 91               | 72.2% | 46             | 73.2%             |
| Suicide is an act that may be done with an intent to take the risk of dying                                            | 93               | 74.4% | 49             | 77.5% (missing=1) |
| Suicide is an act that may be done without explicit intent to die                                                      | 68               | 54.0% | 34             | 53.9%             |
| <b>Knowledge (four separate items)</b>                                                                                 |                  |       |                |                   |
| Suicide is an act that is necessarily performed with certainty of a fatal result                                       | 44               | 34.9% | 26             | 41.2%             |
| Suicide is an act that can be performed with the knowledge of a fatal result, but person is not certain of that result | 112              | 88.9% | 55             | 87.1%             |
| Suicide is an act that can be performed without any knowledge of the consequences of the act                           | 56               | 44.4% | 26             | 41.9%             |
| Suicide is an act that can be performed with the certainty that the result will not be fatal                           | 27               | 21.4% | 16             | 26.1%             |
| <b>Agency (one item)</b>                                                                                               |                  |       |                |                   |
| Suicide is an act that is initiated and necessarily carried out by oneself to the end of the action                    | 75               | 60.0% | 40             | 64.2%             |
| ... is initiated by oneself, but not necessarily carried out by oneself to the end of the action                       | 32               | 25.6% | 15             | 24.3%             |
| ... can be initiated and carried out by oneself or by someone else                                                     | 18               | 14.4% | 8              | 12.3%             |
| Missing                                                                                                                | 1                |       | 1              |                   |

\*sensitivity analyses (calculated using weights)

Supplementary Table 3. Individual and country-based results of Vignettes

|                                                                                                                                                                                             | Individual based |       | Country based* |       |
|---------------------------------------------------------------------------------------------------------------------------------------------------------------------------------------------|------------------|-------|----------------|-------|
| <b>Vignette 1.</b> In your country, when professionals (e.g. clinicians, researchers) talk about a person harms him- or herself, with the intention to die, and survives, his or her act is |                  |       |                |       |
|                                                                                                                                                                                             | N                | %     | N              | %     |
| A suicide attempt                                                                                                                                                                           | 116              | 92.1% | 57             | 90.9% |
| Parasuicide                                                                                                                                                                                 | 1                | 0.8%  | 1              | 1.6%  |
| Self-harm                                                                                                                                                                                   | 3                | 2.4%  | 2              | 3.7%  |
| Deliberate self-harm                                                                                                                                                                        | 2                | 1.6%  | 1              | 0.9%  |
| Non-fatal suicidal behavior                                                                                                                                                                 | 3                | 2.4%  | 1              | 1.3%  |
| Self-injurious behavior (including self-poisoning/overdosing with medication)                                                                                                               | 1                | 0.8%  | 1              | 1.6%  |
| <b>Vignette 2.</b> (...) when a person harms him- or herself without any intention to die, and survives, his or her act is                                                                  |                  |       |                |       |
|                                                                                                                                                                                             | N                | %     | N              | %     |
| A suicide attempt                                                                                                                                                                           | 17               | 13.5% | 11             | 17.7% |
| Parasuicide                                                                                                                                                                                 | 5                | 4.0%  | 4              | 5.8%  |
| Self-harm                                                                                                                                                                                   | 35               | 27.8% | 19             | 29.6% |
| Deliberate self-harm                                                                                                                                                                        | 22               | 17.5% | 9              | 14.0% |
| Non suicidal self-injury                                                                                                                                                                    | 24               | 19.0% | 8              | 12.2% |
| Self-mutilation                                                                                                                                                                             | 9                | 7.1%  | 4              | 6.9%  |
| Non-fatal suicidal behavior                                                                                                                                                                 | 4                | 3.2%  | 3              | 4.0%  |
| Self-injurious behavior (including self-poisoning/overdosing with medication)                                                                                                               | 10               | 7.9%  | 6              | 9.8%  |
| <b>Vignette 3.</b> (...) when a person harms him- or herself without any intention to die, and dies, his or her act is                                                                      |                  |       |                |       |
|                                                                                                                                                                                             | N                | %     | N              | %     |
| A suicide                                                                                                                                                                                   | 30               | 24.0% | 17             | 26.7% |
| A suicide attempt                                                                                                                                                                           | 7                | 5.6%  | 5              | 7.8%  |
| Parasuicide                                                                                                                                                                                 | 5                | 4.0%  | 3              | 5.1%  |
| Self-harm                                                                                                                                                                                   | 10               | 8.0%  | 5              | 8.4%  |
| Deliberate self-harm                                                                                                                                                                        | 7                | 5.6%  | 3              | 4.8%  |
| Non suicidal self-injury                                                                                                                                                                    | 11               | 8.8%  | 4              | 6.8%  |
| Self-mutilation                                                                                                                                                                             | 3                | 2.4%  | 2              | 2.4%  |
| Fatal suicidal behavior                                                                                                                                                                     | 10               | 8.0%  | 5              | 8.4%  |
| Self-directed violence                                                                                                                                                                      | 1                | 0.8%  | 1              | 1.6%  |
| Self-injurious behavior (including self-poisoning/overdosing with medication)                                                                                                               | 10               | 8.0%  | 3              | 5.4%  |
| An accident                                                                                                                                                                                 | 22               | 17.6% | 11             | 17.5% |
| An undetermined death (open verdict)                                                                                                                                                        | 9                | 7.2%  | 3              | 4.8%  |
| Missing                                                                                                                                                                                     | 1                |       | 0              |       |
| <b>Vignette 4.</b> (...) when a person harms him- or herself, but, for whatever reasons, cannot state his or her intentions and the person survives, his or her act is                      |                  |       |                |       |
|                                                                                                                                                                                             | N                | %     | N              | %     |
| A suicide attempt                                                                                                                                                                           | 31               | 25.0% | 20             | 32.2% |
| Parasuicide                                                                                                                                                                                 | 7                | 5.6%  | 4              | 7.1%  |
| Self-harm                                                                                                                                                                                   | 23               | 18.5% | 9              | 15.3% |
| Deliberate self-harm                                                                                                                                                                        | 18               | 14.5% | 8              | 13.4% |
| Non suicidal self-injury                                                                                                                                                                    | 8                | 6.5%  | 3              | 5.3%  |
| Self mutilation                                                                                                                                                                             | 2                | 1.6%  | 1              | 2.2%  |
| Non-fatal suicidal behavior                                                                                                                                                                 | 3                | 2.4%  | 1              | 1.4%  |
| Self-directed violence                                                                                                                                                                      | 3                | 2.4%  | 1              | 1.8%  |

|   |                                                                               |    |       |   |      |
|---|-------------------------------------------------------------------------------|----|-------|---|------|
| 1 | Self-injurious behavior (including self-poisoning/overdosing with medication) | 15 | 12.1% | 6 | 9.6% |
| 2 | An accident                                                                   | 3  | 2.4%  | 3 | 4.8% |
| 3 | An undetermined event                                                         | 11 | 8.9%  | 4 | 6.8% |
| 4 | Missing                                                                       | 2  |       | 1 |      |

5  
6 **Vignette 5.** (...) when a person harms him- or herself, but does not want to state his or her intentions and the person survives, his or her act is

| 7  |                                                                               | N  | %     | N  | %     |
|----|-------------------------------------------------------------------------------|----|-------|----|-------|
| 8  |                                                                               |    |       |    |       |
| 9  |                                                                               |    |       |    |       |
| 10 | A suicide attempt                                                             | 34 | 27.4% | 21 | 34.3% |
| 11 | Parasuicide                                                                   | 5  | 4.0%  | 3  | 4.8%  |
| 12 | Self-harm                                                                     | 28 | 22.6% | 12 | 19.1% |
| 13 | Deliberate self-harm                                                          | 25 | 20.2% | 12 | 19.9% |
| 14 | Non suicidal self-injury                                                      | 5  | 4.0%  | 2  | 3.6%  |
| 15 | Non-fatal suicidal behavior                                                   | 1  | 0.8%  | 0  | 0.1%  |
| 16 | Self-directed violence                                                        | 2  | 1.6%  | 1  | 1.6%  |
| 17 | Self-injurious behavior (including self-poisoning/overdosing with medication) | 11 | 8.9%  | 4  | 5.9%  |
| 18 | An accident                                                                   | 3  | 2.4%  | 3  | 4.8%  |
| 19 | An undetermined event                                                         | 10 | 8.1%  | 4  | 5.7%  |
| 20 | Missing                                                                       | 2  |       | 1  |       |

21  
22 **Vignette 6.** (...) when a person dies as a consequence of harming him or herself, but his or her intentions in doing so cannot be known or inferred, his or her act is

| 23 |                                                                               | N  | %     | N  | %     |
|----|-------------------------------------------------------------------------------|----|-------|----|-------|
| 24 |                                                                               |    |       |    |       |
| 25 |                                                                               |    |       |    |       |
| 26 |                                                                               |    |       |    |       |
| 27 |                                                                               |    |       |    |       |
| 28 | A suicide                                                                     | 53 | 42.1% | 33 | 52.3% |
| 29 | A suicide attempt                                                             | 3  | 2.4%  | 2  | 3.3%  |
| 30 | Parasuicide                                                                   | 2  | 1.6%  | 2  | 3.2%  |
| 31 | Self-harm                                                                     | 6  | 4.8%  | 3  | 4.3%  |
| 32 | Deliberate self-harm                                                          | 5  | 4.0%  | 3  | 4.3%  |
| 33 | Non-fatal suicidal behavior                                                   | 1  | 0.8%  | 1  | 1.6%  |
| 34 | Self-directed violence                                                        | 1  | 0.8%  | 1  | 0.8%  |
| 35 | Self-injurious behavior (including self-poisoning/overdosing with medication) | 7  | 5.6%  | 2  | 2.7%  |
| 36 | An accident                                                                   | 8  | 6.3%  | 4  | 6.2%  |
| 37 | An undetermined death (open verdict)                                          | 40 | 31.7% | 13 | 21.4% |

38  
39 **Vignette 7.** (...) when someone who occasionally thinks of suicide when confronted to distress, this person has

| 40 |                              | N  | %     | N  | %     |
|----|------------------------------|----|-------|----|-------|
| 41 |                              |    |       |    |       |
| 42 |                              |    |       |    |       |
| 43 |                              |    |       |    |       |
| 44 | A normal pattern of thinking | 16 | 12.8% | 8  | 12.8% |
| 45 | Suicidal ideation            | 81 | 64.8% | 40 | 63.0% |
| 46 | Passive suicidal ideation    | 6  | 4.8%  | 4  | 5.7%  |
| 47 | Active suicidal ideation     | 1  | 0.8%  | 0  | 0.1%  |
| 48 | Death wishes                 | 7  | 5.6%  | 5  | 7.8%  |
| 49 | Reactive suicide ideation    | 14 | 11.2% | 6  | 10.2% |
| 50 | Missing                      | 1  |       | 0  |       |

51  
52 **Vignette 8.** (...) when someone who continuously thinks of suicide but has no suicidal intent, this person has

| 53 |                              | N  | %     | N  | %     |
|----|------------------------------|----|-------|----|-------|
| 54 |                              |    |       |    |       |
| 55 |                              |    |       |    |       |
| 56 | A normal pattern of thinking | 2  | 1.6%  | 1  | 1.6%  |
| 57 | Suicidal ideation            | 57 | 45.2% | 29 | 46.2% |
| 58 | Passive suicidal ideation    | 12 | 9.5%  | 7  | 11.6% |
| 59 | Active suicidal ideation     | 10 | 7.9%  | 6  | 9.1%  |
| 60 | Persistent suicide ideation  | 39 | 31.0% | 15 | 24.1% |
|    | Death wishes                 | 6  | 4.8%  | 5  | 7.4%  |

**Vignette 9.** (...) when someone who hopes for death but has no thoughts of killing him- or herself, this person has

|                              | N  | %     | N  | %     |
|------------------------------|----|-------|----|-------|
| A normal pattern of thinking | 6  | 4.8%  | 4  | 5.8%  |
| Suicidal ideation            | 18 | 14.4% | 7  | 11.6% |
| Passive suicidal ideation    | 29 | 23.2% | 15 | 23.1% |
| Death wishes                 | 72 | 57.6% | 37 | 59.3% |
| Missing                      | 1  |       | 0  |       |

**Vignette 10.** (...) when someone hopes for death by killing him- or herself, this person has

|                              | N  | %     | N  | %     |
|------------------------------|----|-------|----|-------|
| A normal pattern of thinking | 1  | 0.8%  | 1  | 1.6%  |
| Suicidal ideation            | 77 | 61.6% | 37 | 59.0% |
| Passive suicidal ideation    | 4  | 3.2%  | 2  | 2.5%  |
| Active suicidal ideation     | 40 | 32.0% | 21 | 33.4% |
| Death wishes                 | 3  | 2.4%  | 2  | 3.4%  |
| Missing                      | 1  |       | 0  |       |

**Vignette 11.** (...) when someone states suicidal intention without engaging in behavior, this person

|                                              | N  | %     | N  | %     |
|----------------------------------------------|----|-------|----|-------|
| Is engaging in suicidal behavior             | 4  | 3.3%  | 2  | 2.6%  |
| Is experiencing suicidal ideation            | 70 | 56.9% | 32 | 52.2% |
| Is experiencing passive suicidal ideation    | 7  | 5.7%  | 2  | 3.6%  |
| Is experiencing active suicidal ideation     | 11 | 8.9%  | 6  | 9.9%  |
| Has made a suicide attempt                   | 1  | 0.8%  | 1  | 1.6%  |
| Has made a suicide threat                    | 10 | 8.1%  | 6  | 10.3% |
| Has made a suicide communication             | 14 | 11.4% | 8  | 12.5% |
| Has made a suicide plan                      | 2  | 1.6%  | 1  | 2.0%  |
| Is engaging in preparatory suicidal behavior | 3  | 2.4%  | 2  | 3.6%  |
| Has made an aborted suicide attempt          | 1  | 0.8%  | 1  | 1.6%  |
| Missing                                      | 3  |       | 2  |       |

**Vignette 12.** (...) when someone mimics (i.e. acts in a way that has the appearance of) suicidal behavior without sustaining any injuries, this person

|                                              | N  | %     | N  | %     |
|----------------------------------------------|----|-------|----|-------|
| Is engaging in suicidal behavior             | 42 | 35.6% | 18 | 30.2% |
| Is experiencing suicidal ideation            | 10 | 8.5%  | 3  | 5.7%  |
| Is experiencing passive suicidal ideation    | 4  | 3.4%  | 2  | 2.9%  |
| Is experiencing active suicidal ideation     | 6  | 5.1%  | 5  | 8.6%  |
| Has made a suicide attempt                   | 9  | 7.6%  | 5  | 7.9%  |
| Has made a suicide threat                    | 23 | 19.5% | 15 | 25.8% |
| Has made a suicide communication             | 10 | 8.5%  | 3  | 5.9%  |
| Has made a suicide plan                      | 3  | 2.5%  | 2  | 3.4%  |
| Is engaging in preparatory suicidal behavior | 8  | 6.8%  | 4  | 6.3%  |
| Has made an aborted suicide attempt          | 3  | 2.5%  | 2  | 2.6%  |
| Missing                                      | 8  |       | 5  |       |

**Vignette 13.** (...) when someone has decided how and when to perform a suicidal act, but does not actively prepare anything, this person

|                                           | N  | %    | N | %     |
|-------------------------------------------|----|------|---|-------|
| Is engaging in suicidal behavior          | 7  | 5.7% | 4 | 6.3%  |
| Is experiencing suicidal ideation         | 11 | 8.9% | 4 | 7.2%  |
| Is experiencing passive suicidal ideation | 1  | 0.8% | 0 | 0.1%  |
| Is experiencing active suicidal ideation  | 12 | 9.8% | 6 | 10.6% |
| Has made a suicide threat                 | 2  | 1.6% | 1 | 2.2%  |
| Has made a suicide communication          | 2  | 1.6% | 1 | 2.0%  |

|   |                                              |    |       |    |       |
|---|----------------------------------------------|----|-------|----|-------|
| 1 | Has made a suicide plan                      | 83 | 67.5% | 40 | 65.2% |
| 2 | Is engaging in preparatory suicidal behavior | 4  | 3.3%  | 3  | 4.6%  |
| 3 | Has made an interrupted suicide attempt      | 1  | 0.8%  | 1  | 1.6%  |
| 4 | Missing                                      | 3  |       | 2  |       |

5 **Vignette 14.** (...) when someone prepares a suicidal act (e.g. assembles pills, buys a gun,  
6 attaches a rope, visits a bridge), but does not initiate it and thus does not sustain any injuries,  
7 this person

| 8  |                                              | N  | %     | N  | %     |
|----|----------------------------------------------|----|-------|----|-------|
| 9  | Is engaging in suicidal behavior             | 8  | 6.6%  | 4  | 6.1%  |
| 10 | Is experiencing suicidal ideation            | 5  | 4.1%  | 3  | 4.7%  |
| 11 | Is experiencing active suicidal ideation     | 7  | 5.7%  | 4  | 5.8%  |
| 12 | Has made a suicide attempt                   | 3  | 2.5%  | 3  | 5.0%  |
| 13 | Has made a suicide threat                    | 3  | 2.5%  | 2  | 3.3%  |
| 14 | Has made a suicide communication             | 1  | 0.8%  | 1  | 0.8%  |
| 15 | Has made a suicide plan                      | 42 | 34.4% | 20 | 33.8% |
| 16 | Is engaging in preparatory suicidal behavior | 52 | 42.6% | 24 | 39.8% |
| 17 | Has made an interrupted suicide attempt      | 1  | 0.8%  | 1  | 0.8%  |
| 18 | Missing                                      | 4  |       | 3  |       |

19 **Vignette 15.** (...) when someone initiates a suicidal act (e.g. stands or sits on the edge of a high  
20 bridge, ties a rope around his or her neck), but stops him or herself before sustaining any  
21 injuries, this person

| 22 |                                              | N  | %     | N  | %     |
|----|----------------------------------------------|----|-------|----|-------|
| 23 | Is engaging in suicidal behavior             | 17 | 14.0% | 6  | 9.9%  |
| 24 | Is experiencing suicidal ideation            | 1  | 0.8%  | 0  | 0.6%  |
| 25 | Is experiencing active suicidal ideation     | 2  | 1.7%  | 2  | 3.3%  |
| 26 | Has made a suicide attempt                   | 23 | 19.0% | 16 | 26.2% |
| 27 | Has made a suicide threat                    | 6  | 5.0%  | 3  | 5.1%  |
| 28 | Has made a suicide communication             | 1  | 0.8%  | 0  | 0.4%  |
| 29 | Has made a suicide plan                      | 2  | 1.7%  | 2  | 3.3%  |
| 30 | Is engaging in preparatory suicidal behavior | 8  | 6.6%  | 3  | 5.7%  |
| 31 | Has made an interrupted suicide attempt      | 21 | 17.4% | 10 | 16.0% |
| 32 | Has made an aborted suicide attempt          | 40 | 33.1% | 18 | 29.7% |
| 33 | Missing                                      | 5  |       | 3  |       |

34 **Vignette 16.** (...) when someone initiates a suicidal act (e.g. stands or sits on the edge of a high  
35 bridge, ties a rope around his or her neck), but is stopped by someone else before sustaining any  
36 injuries, this person

| 37 |                                          | N  | %     | N  | %     |
|----|------------------------------------------|----|-------|----|-------|
| 38 | Is engaging in suicidal behavior         | 7  | 5.8%  | 4  | 6.4%  |
| 39 | Is experiencing suicidal ideation        | 1  | 0.8%  | 0  | 0.6%  |
| 40 | Is experiencing active suicidal ideation | 1  | 0.8%  | 1  | 1.7%  |
| 41 | Has made a suicide attempt               | 33 | 27.3% | 19 | 32.2% |
| 42 | Has made a suicide communication         | 1  | 0.8%  | 1  | 1.7%  |
| 43 | Has made a suicide plan                  | 1  | 0.8%  | 0  | 0.4%  |
| 44 | Has made an interrupted suicide attempt  | 71 | 58.7% | 31 | 51.2% |
| 45 | Has made an aborted suicide attempt      | 6  | 5.0%  | 4  | 6.1%  |
| 46 | Missing                                  | 5  |       | 3  |       |

47 \*sensitivity analyses (calculated using weights)

Supplementary Figure 2. Percentage of respondents who agreed with statements regarding the definition of suicide according to national income in the ISDELT SB sample (HIC=High Income Country; LMIC=Low- and Middle-Income Country)

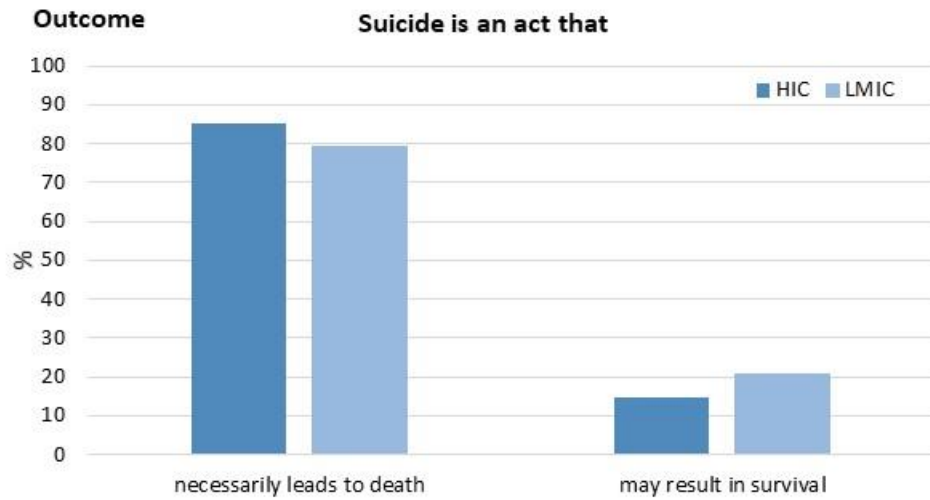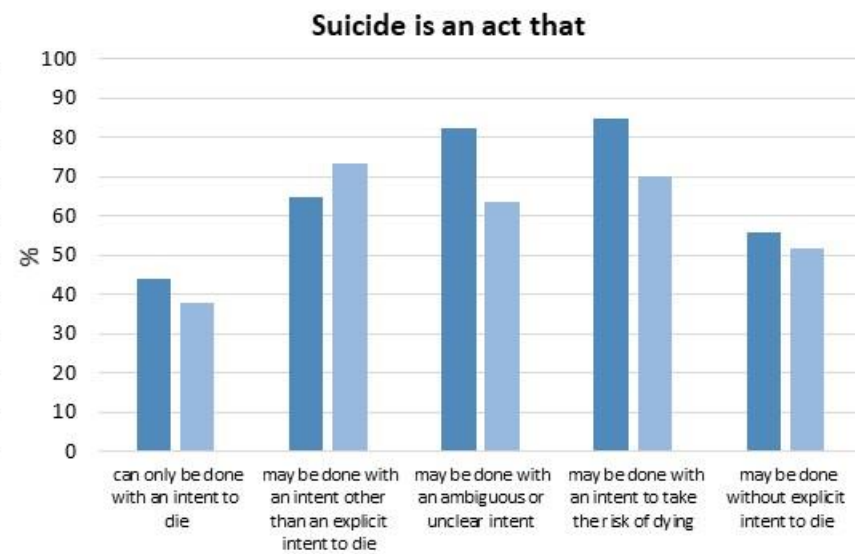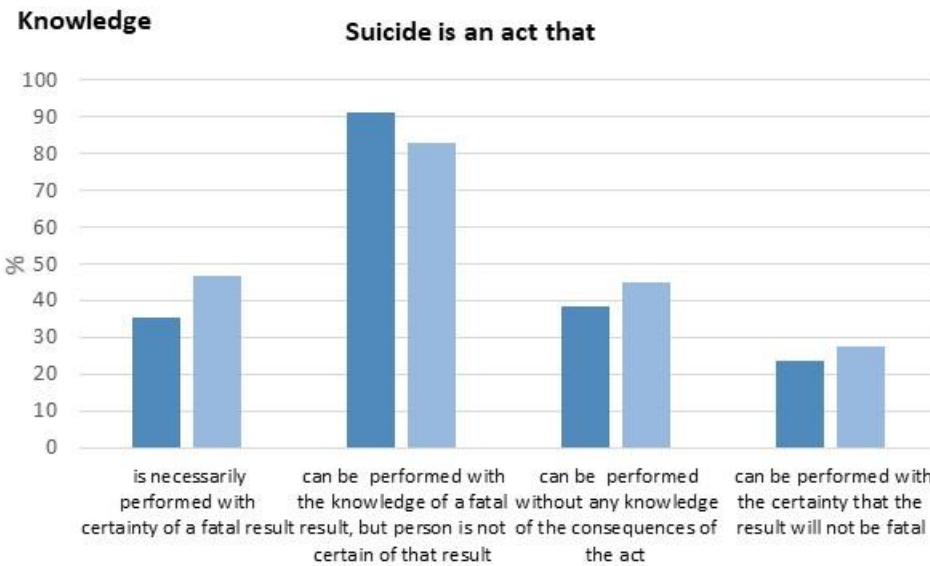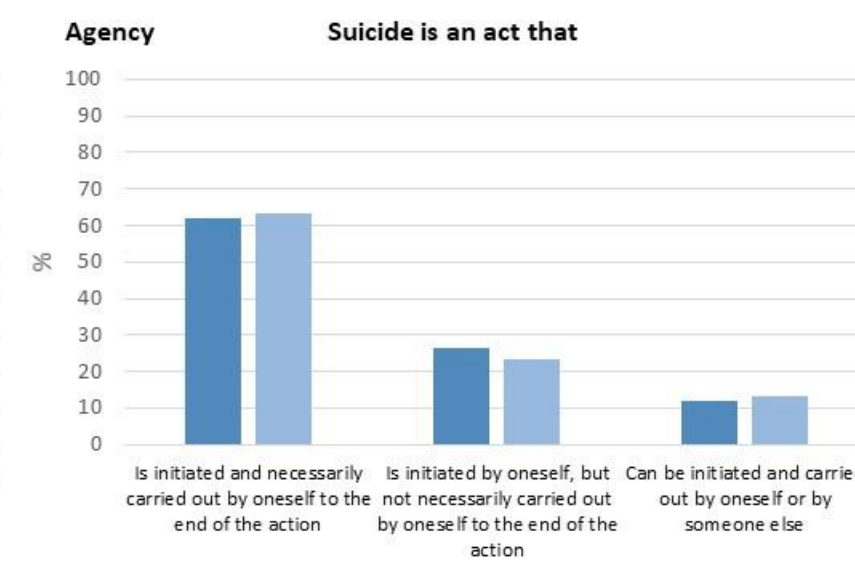

Supplementary Figure 3. Percentage of respondents agreeing to statements regarding the definition of suicidal behaviours (Vignettes 1-8) by national income in ISDTSB sample (HIC=High Income Country; LMIC=Low- and Middle-Income Country)

**Vignette 1** (...) when a person harms him- or herself, with the **intention to die**, and **survives**, his or her act is

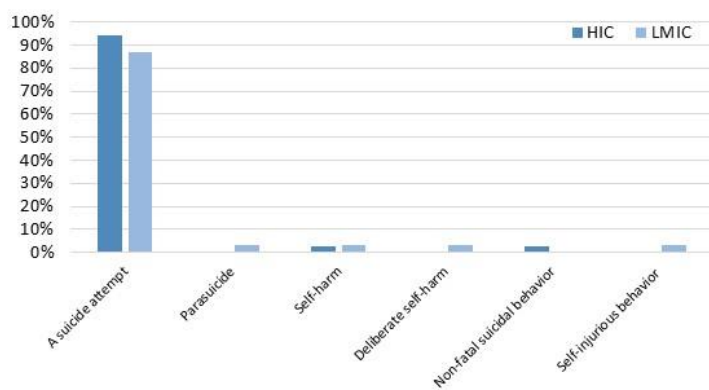

**Vignette 2** (...) when a person harms him- or herself **without any intention to die**, and **survives**, his or her act is

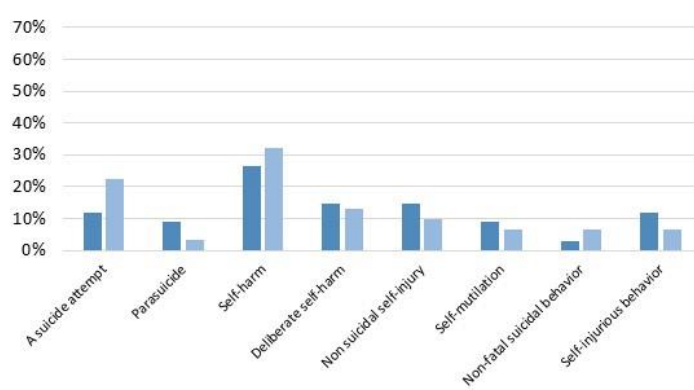

**Vignette 3** (...) when a person harms him- or herself **without any intention to die**, and **dies**, his or her act is

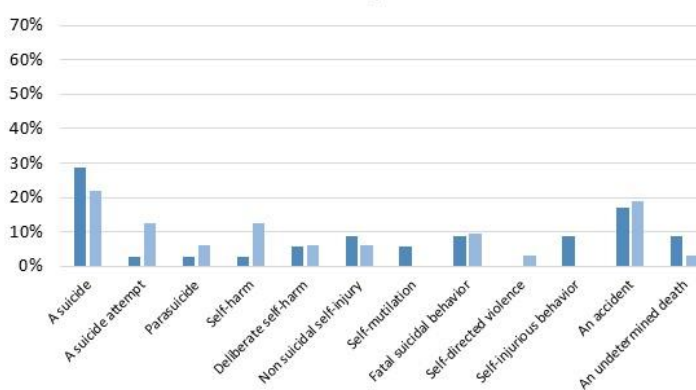

**Vignette 4** (...) when a person harms him- or herself, but, for whatever reasons, **cannot state his or her intentions** and the person **survives**, his or her act is

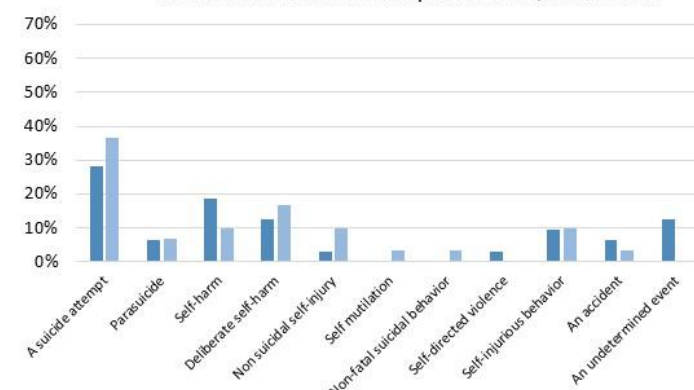

**Vignette 5** (...) when a person harms him- or herself, but **does not want to state his or her intentions** and the person **survives**, his or her act is

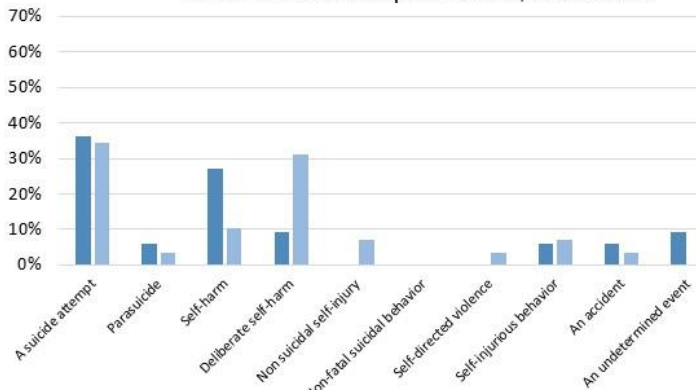

**Vignette 6** (...) when a person dies as a consequence of harming him or herself, but his or her intentions in doing so **cannot be known or inferred**, his or her act is

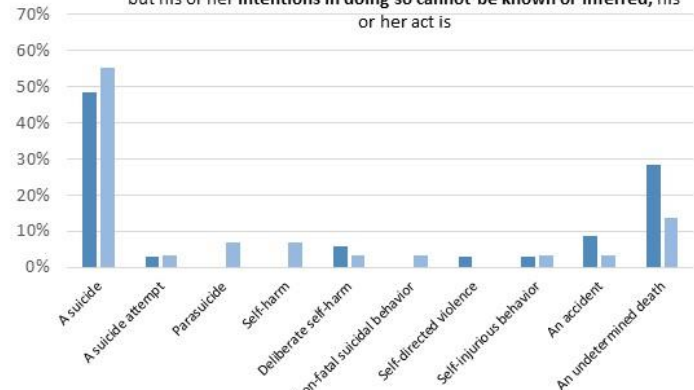

**Vignette 7** (...) when someone who **occasionally thinks of suicide** when confronted to distress, this person has

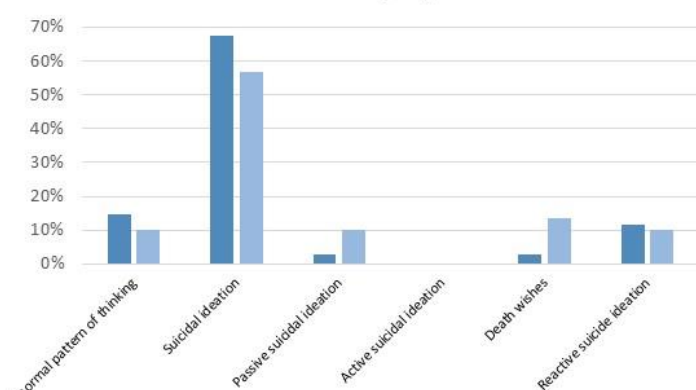

**Vignette 8** (...) when someone who **continuously thinks of suicide** but has **no suicidal intent**, this person has

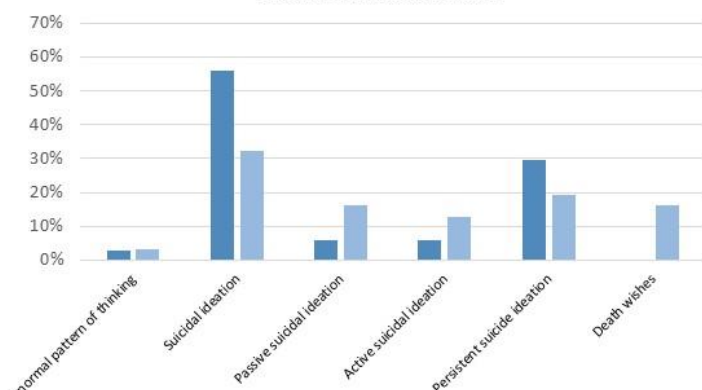

Supplementary Figure 4. Percentage of respondents agreeing to statements regarding the definition of suicidal behaviours (Vignettes 9-16) by national income in ISDTSB sample (HIC=High Income Country; LMIC=Low- and Middle-Income Country)

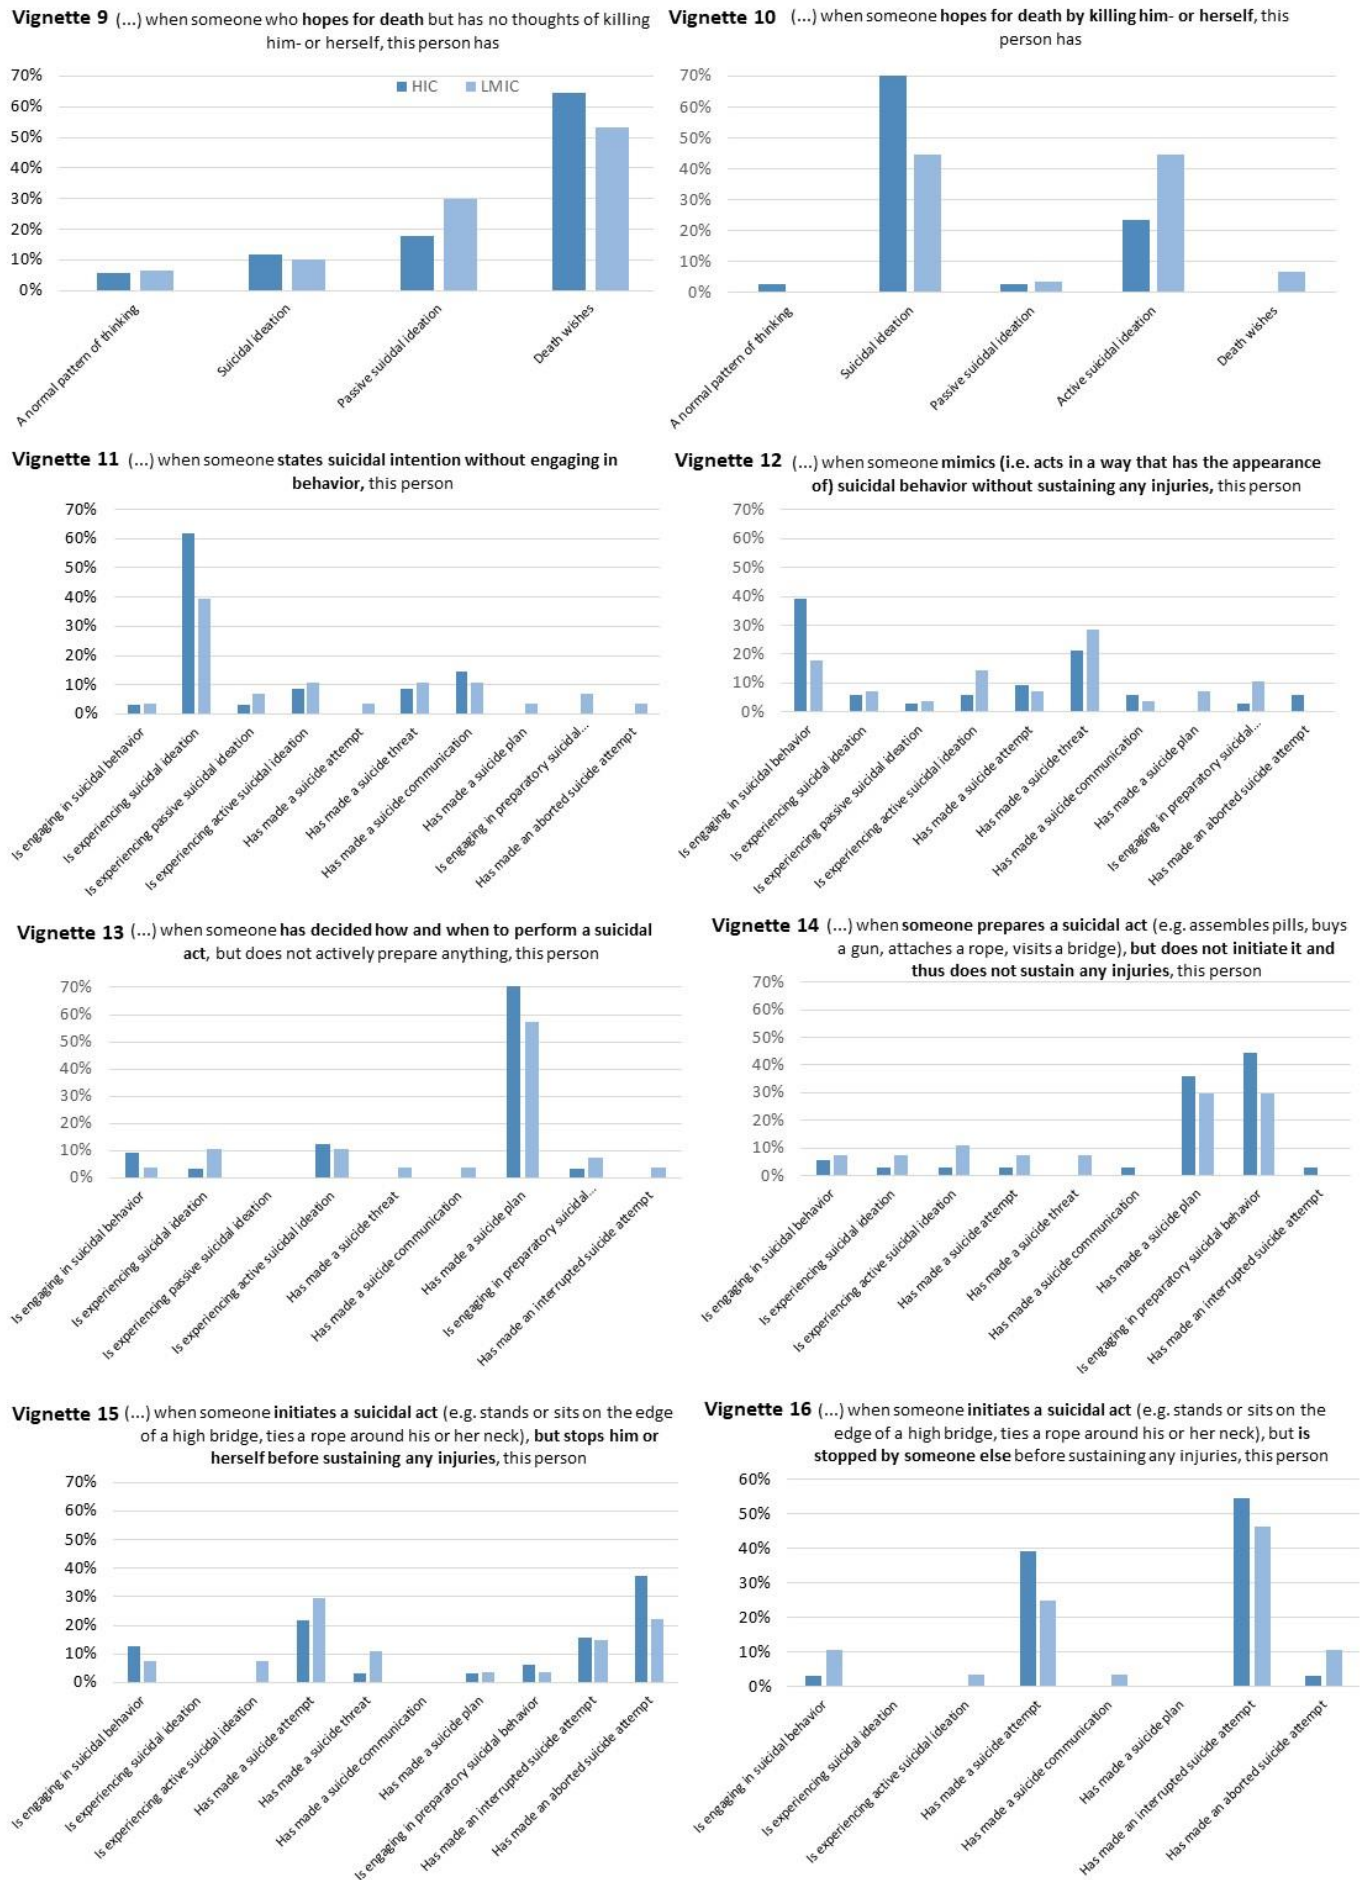



## STROBE Statement

|                           | Item No. | Recommendation                                                                                                                                                                                    | Page No. |
|---------------------------|----------|---------------------------------------------------------------------------------------------------------------------------------------------------------------------------------------------------|----------|
| <b>Title and abstract</b> | 1        | (a) Indicate the study's design with a commonly used term in the title or the abstract                                                                                                            | 2        |
|                           |          | (b) Provide in the abstract an informative and balanced summary of what was done and what was found                                                                                               | 2        |
| <b>Introduction</b>       |          |                                                                                                                                                                                                   |          |
| Background/rationale      | 2        | Explain the scientific background and rationale for the investigation being reported                                                                                                              | 4        |
| Objectives                | 3        | State specific objectives, including any prespecified hypotheses                                                                                                                                  | 4        |
| <b>Method</b>             |          |                                                                                                                                                                                                   |          |
| Study design              | 4        | Present key elements of study design early in the paper                                                                                                                                           | 5        |
| Setting                   | 5        | Describe the setting, locations, and relevant dates, including periods of recruitment, exposure, follow-up, and data collection                                                                   | 5-6      |
| Participants              | 6        | (a) <i>Cohort study</i> —Give the eligibility criteria, and the sources and methods of selection of participants. Describe methods of follow-up                                                   | 5-6      |
|                           |          | <i>Case-control study</i> —Give the eligibility criteria, and the sources and methods of case ascertainment and control selection. Give the rationale for the choice of cases and controls        |          |
|                           |          | <i>Cross-sectional study</i> —Give the eligibility criteria, and the sources and methods of selection of participants                                                                             |          |
| Variables                 | 7        | Clearly define all outcomes, exposures, predictors, potential confounders, and effect modifiers. Give diagnostic criteria, if applicable                                                          | 5-6      |
| Data sources/measurement  | 8*       | For each variable of interest, give sources of data and details of methods of assessment (measurement). Describe comparability of assessment methods if there is more than one group              | 5        |
| Bias                      | 9        | Describe any efforts to address potential sources of bias                                                                                                                                         | 5-6      |
| Study size                | 10       | Explain how the study size was arrived at                                                                                                                                                         | 6        |
| Quantitative variables    | 11       | Explain how quantitative variables were handled in the analyses. If applicable, describe which groupings were chosen and why                                                                      | 6        |
| Statistical methods       | 12       | (a) Describe all statistical methods, including those used to control for confounding                                                                                                             | 6        |
|                           |          | (b) Describe any methods used to examine subgroups and interactions                                                                                                                               | 6        |
|                           |          | (c) Explain how missing data were addressed                                                                                                                                                       | 6        |
|                           |          | (d) <i>Cohort study</i> —If applicable, explain how loss to follow-up was addressed                                                                                                               | NA       |
|                           |          | <i>Case-control study</i> —If applicable, explain how matching of cases and controls was addressed                                                                                                |          |
|                           |          | <i>Cross-sectional study</i> —If applicable, describe analytical methods taking account of sampling strategy                                                                                      |          |
|                           |          | (e) Describe any sensitivity analyses                                                                                                                                                             | NA       |
| Participants              | 13*      | (a) Report numbers of individuals at each stage of study—eg numbers potentially eligible, examined for eligibility, confirmed eligible, included in the study, completing follow-up, and analysed | 5        |

|                          |     |                                                                                                                                                                                                              |       |
|--------------------------|-----|--------------------------------------------------------------------------------------------------------------------------------------------------------------------------------------------------------------|-------|
|                          |     | (b) Give reasons for non-participation at each stage                                                                                                                                                         | NA    |
|                          |     | (c) Consider use of a flow diagram                                                                                                                                                                           | NA    |
| Descriptive data         | 14* | (a) Give characteristics of study participants (eg demographic, clinical, social) and information on exposures and potential confounders                                                                     | 5-6   |
|                          |     | (b) Indicate number of participants with missing data for each variable of interest                                                                                                                          | 6-10  |
|                          |     | © <i>Cohort study</i> —Summarise follow-up time (eg, average and total amount)                                                                                                                               | NA    |
| Outcome data             | 15* | <i>Cohort study</i> —Report numbers of outcome events or summary measures over time                                                                                                                          |       |
|                          |     | <i>Case-control study</i> —Report numbers in each exposure category, or summary measures of exposure                                                                                                         |       |
|                          |     | <i>Cross-sectional study</i> —Report numbers of outcome events or summary measures                                                                                                                           | 6-10  |
| Main results             | 16  | (a) Give unadjusted estimates and, if applicable, confounder-adjusted estimates and their precision (eg, 95% confidence interval). Make clear which confounders were adjusted for and why they were included | 6-10  |
|                          |     | (b) Report category boundaries when continuous variables were categorized                                                                                                                                    | 6-10  |
|                          |     | © If relevant, consider translating estimates of relative risk into absolute risk for a meaningful time period                                                                                               | NA    |
| Other analyses           | 17  | Report other analyses done—eg analyses of subgroups and interactions, and sensitivity analyses                                                                                                               | 6-10  |
| Key results              | 18  | Summarise key results with reference to study objectives                                                                                                                                                     | 10-12 |
| Limitations              | 19  | Discuss limitations of the study, taking into account sources of potential bias or imprecision. Discuss both direction and magnitude of any potential bias                                                   | 14-15 |
| Interpretation           | 20  | Give a cautious overall interpretation of results considering objectives, limitations, multiplicity of analyses, results from similar studies, and other relevant evidence                                   | 16    |
| Generalisability         | 21  | Discuss the generalisability (external validity) of the study results                                                                                                                                        | 15-16 |
| <b>Other information</b> |     |                                                                                                                                                                                                              |       |
| Funding                  | 22  | Give the source of funding and the role of the funders for the present study and, if applicable, for the original study on which the present article is based                                                | 18    |

\*Give information separately for cases and controls in case-control studies and, if applicable, for exposed and unexposed groups in cohort and cross-sectional studies.

**Note:** An Explanation and Elaboration article discusses each checklist item and gives methodological background and published examples of transparent reporting. The STROBE checklist is best used in conjunction with this article (freely available on the Web sites of PLoS Medicine at <http://www.plosmedicine.org/>, Annals of Internal Medicine at <http://www.annals.org/>, and Epidemiology at <http://www.epidem.com/>). Information on the STROBE Initiative is available at [www.strobe-statement.org](http://www.strobe-statement.org).

# BMJ Open

## International Study of Definitions of English-Language Terms for Suicidal Behaviors ©: A survey exploring preferred terminology

|                                 |                                                                                                                                                                                                                                                                                                                                                                                                                                                                                                                                                                                                                                                                                                                                                                                                                                                                                                                                                                                                                                                                                                                                                                                                                                                                                                                                                                                                                                                                                                                             |
|---------------------------------|-----------------------------------------------------------------------------------------------------------------------------------------------------------------------------------------------------------------------------------------------------------------------------------------------------------------------------------------------------------------------------------------------------------------------------------------------------------------------------------------------------------------------------------------------------------------------------------------------------------------------------------------------------------------------------------------------------------------------------------------------------------------------------------------------------------------------------------------------------------------------------------------------------------------------------------------------------------------------------------------------------------------------------------------------------------------------------------------------------------------------------------------------------------------------------------------------------------------------------------------------------------------------------------------------------------------------------------------------------------------------------------------------------------------------------------------------------------------------------------------------------------------------------|
| Journal:                        | <i>BMJ Open</i>                                                                                                                                                                                                                                                                                                                                                                                                                                                                                                                                                                                                                                                                                                                                                                                                                                                                                                                                                                                                                                                                                                                                                                                                                                                                                                                                                                                                                                                                                                             |
| Manuscript ID                   | bmjopen-2020-043409.R2                                                                                                                                                                                                                                                                                                                                                                                                                                                                                                                                                                                                                                                                                                                                                                                                                                                                                                                                                                                                                                                                                                                                                                                                                                                                                                                                                                                                                                                                                                      |
| Article Type:                   | Original research                                                                                                                                                                                                                                                                                                                                                                                                                                                                                                                                                                                                                                                                                                                                                                                                                                                                                                                                                                                                                                                                                                                                                                                                                                                                                                                                                                                                                                                                                                           |
| Date Submitted by the Author:   | 27-Jan-2021                                                                                                                                                                                                                                                                                                                                                                                                                                                                                                                                                                                                                                                                                                                                                                                                                                                                                                                                                                                                                                                                                                                                                                                                                                                                                                                                                                                                                                                                                                                 |
| Complete List of Authors:       | De Leo, Diego; Griffith University, Australian Institute of Suicide Research and Prevention, School of Applied Psychology<br>Goodfellow, Benjamin; Griffith University, Australian Institute of Suicide Research and Prevention, School of Applied Psychology; Centre Hospitalier Albert Bousquet<br>Silverman, Morton; Medical College of Wisconsin<br>Berman, Alan; Johns Hopkins School of Medicine, Department of Psychiatry and Behavioral Sciences<br>Mann, John; Columbia University, Departments of Psychiatry and Radiology<br>Arensman , Ella ; University College Cork, National Suicide Research Foundation, School of Public Health<br>Hawton, Keith; Oxford University, Centre for Suicide Research<br>Phillips, M. R.; Shanghai Jiao Tong University School of Medicine, Suicide Research and Prevention Center, Shanghai Mental Health Center; Columbia University, Departments of Psychiatry and Epidemiology<br>Vijayakumar , Lakshmi ; The Voluntary Health Services Hospital, Department of Psychiatry<br>Andriessen, Karl; The University of Melbourne, Centre for Mental Health, Melbourne School of Population and Global Health<br>Chavez-Hernandez, Ana-Maria; University of Guanajuato, Department of Psychology<br>Heisel, Marnin; University of Western Ontario, Department of Psychiatry; University of Rochester, Center for the Study and Prevention of Suicide<br>Kolves, Kairi; Griffith University, Australian Institute of Suicide Research and Prevention, School of Applied Psychology |
| <b>Primary Subject Heading</b>: | Mental health                                                                                                                                                                                                                                                                                                                                                                                                                                                                                                                                                                                                                                                                                                                                                                                                                                                                                                                                                                                                                                                                                                                                                                                                                                                                                                                                                                                                                                                                                                               |
| Secondary Subject Heading:      | Mental health                                                                                                                                                                                                                                                                                                                                                                                                                                                                                                                                                                                                                                                                                                                                                                                                                                                                                                                                                                                                                                                                                                                                                                                                                                                                                                                                                                                                                                                                                                               |
| Keywords:                       | Suicide & self-harm < PSYCHIATRY, EPIDEMIOLOGY, MENTAL HEALTH                                                                                                                                                                                                                                                                                                                                                                                                                                                                                                                                                                                                                                                                                                                                                                                                                                                                                                                                                                                                                                                                                                                                                                                                                                                                                                                                                                                                                                                               |
|                                 |                                                                                                                                                                                                                                                                                                                                                                                                                                                                                                                                                                                                                                                                                                                                                                                                                                                                                                                                                                                                                                                                                                                                                                                                                                                                                                                                                                                                                                                                                                                             |

1  
2  
3  
4  
5  
6  
7  
8  
9  
10  
11  
12  
13  
14  
15  
16  
17  
18  
19  
20  
21  
22  
23  
24  
25  
26  
27  
28  
29  
30  
31  
32  
33  
34  
35  
36  
37  
38  
39  
40  
41  
42  
43  
44  
45  
46  
47  
48  
49  
50  
51  
52  
53  
54  
55  
56  
57  
58  
59  
60

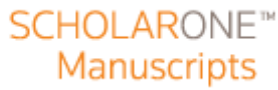

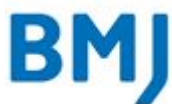

I, the Submitting Author has the right to grant and does grant on behalf of all authors of the Work (as defined in the below author licence), an exclusive licence and/or a non-exclusive licence for contributions from authors who are: i) UK Crown employees; ii) where BMJ has agreed a CC-BY licence shall apply, and/or iii) in accordance with the terms applicable for US Federal Government officers or employees acting as part of their official duties; on a worldwide, perpetual, irrevocable, royalty-free basis to BMJ Publishing Group Ltd ("BMJ") its licensees and where the relevant Journal is co-owned by BMJ to the co-owners of the Journal, to publish the Work in this journal and any other BMJ products and to exploit all rights, as set out in our [licence](#).

The Submitting Author accepts and understands that any supply made under these terms is made by BMJ to the Submitting Author unless you are acting as an employee on behalf of your employer or a postgraduate student of an affiliated institution which is paying any applicable article publishing charge ("APC") for Open Access articles. Where the Submitting Author wishes to make the Work available on an Open Access basis (and intends to pay the relevant APC), the terms of reuse of such Open Access shall be governed by a Creative Commons licence – details of these licences and which [Creative Commons](#) licence will apply to this Work are set out in our licence referred to above.

Other than as permitted in any relevant BMJ Author's Self Archiving Policies, I confirm this Work has not been accepted for publication elsewhere, is not being considered for publication elsewhere and does not duplicate material already published. I confirm all authors consent to publication of this Work and authorise the granting of this licence.

# International Study of Definitions of English-Language Terms for Suicidal Behaviors ©: A survey exploring preferred terminology

Diego De Leo<sup>1</sup>, Benjamin Goodfellow <sup>1,2</sup>, Morton M. Silverman<sup>3</sup>, Alan Berman<sup>4</sup>, J. John Mann<sup>5</sup>, Ella Arensman<sup>6</sup>, Keith Hawton<sup>7</sup>, Michael R. Phillips<sup>8</sup>, Lakshmi Vijayakumar<sup>9</sup>, Karl Andriessen<sup>10</sup>, Ana-Maria Chavez-Hernandez<sup>11</sup>, Marnin Heisel<sup>12</sup>, Kairi Kõlves<sup>1</sup>

1 Australian Institute of Suicide Research and Prevention, World Health Organization Collaborating Centre for Research in Suicide Prevention and Training, School of Applied Psychology, Griffith University, Mt Gravatt, Queensland, Australia

2 Centre Hospitalier Albert Bousquet, Nouméa, New Caledonia

3 Medical College of Wisconsin, Milwaukee, Wisconsin, USA

4 Department of Psychiatry and Behavioral Sciences, Johns Hopkins School of Medicine, Baltimore, MD, USA

5 Departments of Psychiatry and Radiology, Columbia University, New York, USA

6 National Suicide Research Foundation & School of Public Health, University College Cork, Cork, Ireland

7 Centre for Suicide Research, University of Oxford, United Kingdom

8 Suicide Research and Prevention Center, Shanghai Mental Health Center, Shanghai Jiao Tong University School of Medicine, Shanghai, China

9 Department of Psychiatry, Voluntary Health Services, Chennai, India

10 Centre for Mental Health, School of Population and Global Health, The University of Melbourne, Melbourne, Victoria, Australia

11 Department of Psychology, University of Guanajuato, Guanajuato, Mexico

12 Department of Psychiatry, The University of Western Ontario, London, Ontario, Canada; University of Rochester Center for the Study and Prevention of Suicide, Rochester, New York, USA

Corresponding author:

Professor Diego de Leo

Australian Institute of Suicide Research and Prevention, World Health Organization Collaborating Centre for Research in Suicide Prevention and Training, Griffith University, Mt Gravatt, Australia.

Phone: +6137353380

E-mail: d.deleo@griffith.edu.au

## Abstract

**Objectives:** Explore international consensus on nomenclatures of suicidal behaviours and analyse differences in terminology between high-income countries (HICs) and low- and middle-income countries (LMICs).

**Design:** An online survey of members of the International Organisation for Suicide Prevention (IASP) used multiple-choice questions and vignettes to assess the four dimensions of the definition of suicidal behaviour: outcome, intent, knowledge and agency.

**Setting:** International.

**Participants:** Respondents included 126 individuals, 37 from 30 LMICs and 89 from 33 HICs. They included 40 IASP national representatives (65% response rate), IASP regular members (20% response rate), and 6 respondents from 6 additional countries identified by other organizations.

**Outcome measures:** Definitions of English-language terms for suicidal behaviours.

**Results:** The recommended definition of 'suicide' describes a fatal act initiated and carried out by the actors themselves. The definition of 'suicide attempt' was restricted to non-fatal acts with intent to die, whereas definition of 'self-harm' more broadly referred to acts with varying motives, including the wish to die. Almost all respondents agreed about the definitions of 'suicidal ideation', 'death wishes', and 'suicide plan'. 'Aborted suicide attempt' and 'interrupted suicide attempt' were not considered components of 'preparatory suicidal behaviour'. There were several differences between representatives from HICs and LMICs.

**Conclusion:** This international opinion survey provided the basis for developing a transcultural nomenclature of suicidal behaviour. Future developments of this nomenclature should be tested in larger samples of professionals, including LMICs may be a challenge.

1  
2  
3 **'Strengths and limitations of this study'**  
4

- 5 - The strength of the study is the inclusion of a range of countries and professional backgrounds.  
6  
7 - The main limitations are the relatively low participation rate and restriction to the English  
8 language.  
9  
10  
11  
12 - There was a differential representation from HICs and LMICs.  
13

14 **Key words:** definition, terminology, nomenclature, classification, suicide, suicidal behaviour  
15  
16  
17  
18  
19  
20  
21  
22  
23  
24  
25  
26  
27  
28  
29  
30  
31  
32  
33  
34  
35  
36  
37  
38  
39  
40  
41  
42  
43  
44  
45  
46  
47  
48  
49  
50  
51  
52  
53  
54  
55  
56  
57  
58  
59  
60

For peer review only



## Introduction

An important limitation to the generalization of suicide research outcomes is the absence of international consensus on terminologies and definitions, making it difficult to compare interpretations and categories of suicidal behaviour among studies originating in different parts of the world. Attempts at developing a nomenclature for suicidal behaviours (e.g.,<sup>1-3</sup>) have not reached international consensus.<sup>4</sup> Several classifications of suicidal behaviours have also been developed and some were based on the noted nomenclatures.<sup>5</sup> To date, the only classification validated by the World Health Organization (WHO) is a classification restricted to methods of self-harm.<sup>6</sup> To our knowledge, there are no previous surveys focussing on reaching consensus on a nomenclature of suicidal behaviours. Therefore, the International Association for Suicide Prevention (IASP) has constituted a Special Interest Group for the development of an internationally applicable nomenclature of suicidal behaviours.<sup>7</sup>

According to official mortality statistics, 793,000 people worldwide died by suicide in 2016; 79% of these cases were from low-and-middle-income (LMIC) countries,<sup>8</sup> whilst most research outputs on suicidal behaviour are produced in high-income countries (HIC). Furthermore, most definitions and terms of common use originate from HIC.<sup>9</sup> However, since LMICs are increasingly producing research on suicide and its prevention, it would be important to obtain a clearer picture of the definitions and terms used around the world.

This article presents the results of the International Study of Definitions of English-Language Terms for Suicidal Behaviors (ISDELTSB), which aimed to assemble a minimum set of commonly understood and widely used terms and definitions to describe suicidal phenomena.<sup>10</sup> Furthermore, we explore differences in preferred terminologies between HICs and LMICs.

## Methodology

The ISDELTSA methodology was based on a survey of members of international organisations having interest in the study and prevention of suicide, namely the IASP, the World Psychiatric Association (WPA), and the World Organization of National Colleges, Academies and Academic Associations of General Practitioners/Family Physicians' (WONCA), with an effort to recruit from the widest possible range of countries. An initial sample was built with one representative per country.<sup>10</sup> These individuals were expected to provide answers that were representative of the views of professionals working in their country. However, the initial call to national delegates of IASP and members of the other associations resulted in a small number of responses. It was therefore decided to widen the study sample by inviting all IASP members to participate, assuming that their interest in suicide prevention could be paralleled by a degree of knowledge in the field of suicide higher than that of lay people. Consequently, each participating country had either one 'expert' (i.e., an IASP national representative, or a member of WPA or WONCA), or at least one IASP member. All procedures were approved by the Griffith University's Human Research Ethics Committee (2017/601).

The survey questionnaire proposed a variety of terms and definitions commonly found in the literature. Details about the questionnaire and other details about methodology are presented in an open access journal.<sup>10</sup>

## *Sample characteristics*

Data were collected in 2018. Initially, as said, respondents comprised only IASP national representatives; among the 62 existing national delegates of the association, 40 agreed to join the study. Three more countries were identified – respectively - by two people designated by the WPA and one by the WONCA. Another three participants were eventually identified by the staff of Australian Institute for Suicide Research and Prevention's (AISRAP) among those countries with no IASP delegate.

1  
2  
3 In this way, representatives from 46 countries took part to the study. To further increase the number  
4  
5 of participants, invitation to join the study was extended to all members of IASP. Out of 408 IASP  
6  
7 regular members (excluding national delegates), 80 agreed to take part in the study. The final number  
8  
9 of consenting respondents was 126 from 63 countries or territories, 37 from 30 LMICs and 89 from 33  
10  
11 HICs. The list and the map of participating countries are available in Supplementary Table (ST) 1 and  
12  
13 Supplementary Figure (SF) 1.  
14  
15

16  
17 English language was an official language or one of the official languages in 23 out of 63 countries; 61  
18  
19 respondents were from a country in which English was not an official language and 65 were from a  
20  
21 country where it was not. Concerning professional background of participants, 30% were medical  
22  
23 doctors, 29% were psychologists, 10% were epidemiologists, and 31% were from 'other' professions  
24  
25 (e.g., social worker, student, sociologist, public health professional, teacher etc).  
26  
27  
28

### 29 ***Patient and public involvement***

30  
31  
32 No patients involved.  
33  
34

### 35 ***Statistical analyses***

36  
37  
38 Statistical analyses were performed using IBM SPSS Version 25.0. Our focus was on the most frequently  
39  
40 used terms. Analyses computed odds ratios (OR) with 95% confidence intervals (95%CI) to compare  
41  
42 HICs vs. LMICs. There were limited missing data (0-6.3%), which were left out from the analyses of  
43  
44 specific items. To enable country-based analyses, we conducted sensitivity analyses by calculating  
45  
46 weights for countries where there were more than one respondent, which also allowed a more even  
47  
48 comparison between HICs and LMICs.  
49  
50  
51

## 52 **Results**

### 53 ***Definition of suicide***

54  
55  
56  
57  
58  
59  
60

1  
2  
3 Agreement on the definition of suicide was assessed by providing a set of statements for each of the  
4  
5 main components of the definition: outcome, intent, knowledge, and agency.<sup>4</sup> Respondents had to  
6  
7 choose the suggestion with which they agreed. The choices of respondents by LMICs vs. HICs are shown  
8  
9  
10 in Figure 1.

11  
12  
13  
14  
15  
16 - Please, insert Figure 1  
17  
18  
19  
20  
21

22 Majority (81.6%; 1 missing) agreed that, "Suicide is an act that necessarily leads to death". Regarding  
23  
24 intent, five non-mutually exclusive statements were proposed (Figure 1). More than half of  
25  
26 respondents agreed with the last statement (5: "Suicide is an act that may be done without explicit  
27  
28 intent to die"). However, respondents agreed more frequently with statements 2-4 (2: "Suicide is an  
29  
30 act that may be done with an intent other than an explicit intent to die"; 3: "Suicide is an act that may  
31  
32 be done with an ambiguous or unclear intent"; 4: "Suicide is an act that may be done with an intent to  
33  
34 take the risk of dying"). Respondents from HIC were more likely to choose statement 3 (OR:2.35;  
35  
36 95%CI: 1.03-5.36), but also in the LMIC group almost 60% of respondents agreed with this statement.  
37  
38  
39

40  
41 In terms of knowledge of the consequences of the act, four statements were proposed. More than half  
42  
43 the respondents agreed with the statement: "Suicide is an act that can be performed with the  
44  
45 knowledge of a fatal result, but the person is not certain of that result", regardless of national income.  
46  
47 Regarding agency, more than half (60%; 1 missing) of respondents agreed with the statement, "Suicide  
48  
49 is an act that is initiated by oneself, but not necessarily carried out by oneself to the end of the action".  
50  
51  
52  
53  
54  
55

56 *Definition of non-fatal forms of suicidal behaviours*  
57  
58  
59  
60

1  
2  
3 For non-fatal suicidal behaviours, a vignette method was used and a set of 16 basic clinical scenarios  
4 was proposed. For each vignette, a list of terms was proposed from which respondents had to choose  
5 a single answer. The percentages of agreement with particular terms for vignettes 1-16 according to  
6 respondents' countries' national income are presented in Figures 2 and 3.  
7  
8  
9  
10

11  
12 Vignette 1 asked respondents how they would name the act of a person who harmed him- or her-self  
13 with the intention to die but survived. The majority of respondents (92.1%) named the act as a 'suicide  
14 attempt' (Figure 2). Vignette 2 described a person who harmed him- or her-self without any intention  
15 to die and survived. The answers were not unanimous; however, the highest agreement was reached  
16 for the term 'self-harm' (27.8%), followed by non-suicidal self-injury' (NSSI; 19%) and 'deliberate self-  
17 harm (17.5%). Vignette 3 described a person who harmed him- or her-self without any intention to die  
18 but died. The highest level of agreement was reached for 'suicide' (24.0%), although 'accident' was  
19 also a frequent choice (17.6%).  
20  
21  
22  
23  
24  
25  
26  
27  
28  
29  
30

31  
32  
33  
34  
35 - Please, insert Figure 2  
36  
37  
38  
39  
40

41 Vignette 4 asked respondents to define the act of a person who harmed him- or her-self, but, for  
42 whatever reasons, could not state his or her intentions and the person survived. While a 'suicide  
43 attempt' was the most frequent choice for LMIC (37.8%), HICs chose 'self-harm' most frequently  
44 (21.8%; OR:0.40; 95%CI: 0.17-0.93; 2 missing). Vignette 5 described a person who harmed him- or her-  
45 self but *did not want* to state his or her intentions and the person survived. The closest levels of  
46 agreement between income groups were for 'suicide attempt' (27.4%) even though the HIC group  
47 chose 'self-harm' most frequently (26.4%).  
48  
49  
50  
51  
52  
53  
54  
55

56  
57 Vignette 6 asked respondents to define the act of a person who died as a consequence of harming him  
58 or her-self, but his or her intentions in doing so could not be known or inferred. Two answers stood  
59  
60

1  
2  
3 out: 'suicide' (42.1%) and 'undetermined death' (31.7%). Respondents from HICs were more likely to  
4  
5 choose 'undetermined death' (HICs: 37.1% vs. LMICs: 18.9%; OR:2.53; 95%CI: 1.00-6.39), and  
6  
7 respondents from LMICs 'suicide' (HICs: 37.1% vs. LMICs: 54.1%; OR:0.50; CI 95%: 0.23-1.09).  
8  
9

10 Vignette 7 described someone who occasionally thought of suicide when feeling distressed: all groups  
11  
12 chose 'suicidal ideation' most frequently (64.8%). Vignette 8 described someone who continuously  
13  
14 thought of suicide but had no suicidal intent. All groups chose 'suicidal ideation' most frequently  
15  
16 (45.2%), followed by 'persistent suicidal ideation' (31%).  
17  
18

19  
20 Figure 3 shows respondents' answers to vignettes 9 to 16 according to income level. Vignette 9  
21  
22 described someone who hoped for death but had no thoughts of killing him- or her-self. Respondents  
23  
24 chose 'death wishes' (57.6%) most frequently across all groups. Vignette 10 described someone who  
25  
26 hoped for death by killing him- or her-self, and most respondents chose the 'suicidal ideation' (61.6%)  
27  
28 followed by 'active suicidal ideation' (32%).  
29  
30  
31  
32  
33  
34  
35

36 - Please, insert Figure 3  
37  
38  
39  
40  
41

42 The following vignettes described behaviours that could be considered as being at the boundary  
43  
44 between behaviour and ideation and could therefore be subject to debate. Vignette 11 asked  
45  
46 respondents to choose a term for someone who stated suicidal intention without engaging in the  
47  
48 behaviour. Although all groups most frequently decided that the person was experiencing 'suicidal  
49  
50 ideation' (56.9% for all), HICs' respondents were more likely to choose 'suicidal ideation' than LMICs  
51  
52 (HICs:63.6%, LMICs:40%; OR:2.63; 95%CI: 1.18-5.87; 3 missing).  
53  
54  
55

56 Vignette 12 described someone who mimicked (i.e. acted in a way that had the appearance of) suicidal  
57  
58 behaviour without sustaining any injuries. The two most frequently chosen answers were 'suicidal  
59  
60

behaviour' (35.6%) and 'suicide threat' (19.5%). However, HICs' respondents were more likely to choose 'suicidal behaviour' (HICs: 63.6% vs. LMICs: 40%; OR:4.32; 95%CI: 1.52-12.26; 8 missing). Vignette 13 asked the respondent to define the behaviour of someone who had decided how and when to perform a suicidal act, but did not actively prepare anything. The 'suicide plan' was most commonly chosen (67.5%). Vignette 14 described someone who prepared a suicidal act (e.g. assembled pills, bought a gun, attached a rope, visited a bridge), but did not initiate it and consequently did not sustain any injuries. The two most frequently chosen options were 'preparatory suicidal behaviour' (42.6%) and 'suicide plan' (34.4%). HICs' respondents were more likely to choose 'preparatory suicidal behaviour' (HICs: 48.9% vs. LMICs: 26.5%; OR:2.65; 95%CI: 1.11-6.33; 4 missing) and the LMIC group chose 'suicide plan' most frequently (HICs: 34.1% vs. LMICs: 35.3%).

Vignette 15 asked the respondent to define the behaviour of someone who initiated a suicidal act (e.g. stood or sat on the edge of a high bridge, tied a rope around his or her neck), but stopped him- or herself before sustaining any injury. The 'aborted suicide attempt' was the most commonly chosen option (33.1%) followed by the 'suicide attempt' (19%). The HIC group chose the 'aborted suicide attempt' most frequently (HICs: 37.9% vs. LMICs: 20.6%; OR:2.65; 95%CI: 1.11-6.33; 5 missing) whereas the LMIC group chose 'suicide attempt' (HICs: 14.9% vs. LMICs: 29.4%; OR: 2.36; 95%CI: 0.92-6.02; 5 missing). Vignette 16 described someone who initiated a suicidal act (e.g. stood or sat on the edge of a high bridge, tied a rope around his or her neck), but was stopped by someone else before sustaining any injuries. The majority agreed on the 'interrupted suicide attempt' (58.7%), followed by the 'suicide attempt' (27.3%).

### *Sensitivity analyses*

Changing the level of analysis from individual respondents to responses by country yielded no differences in in the most commonly chosen item; in general, the change remained within +/- 10% (ST 2 & 3). Comparisons between HICs and LMICs showed some changes in the order. For Vignettes 5 and

1  
2  
3 6, the most frequently chosen item by HICs changed into the same as in LMICs and for Vignette 3 and  
4  
5 14, the LMICs most predominant item became more similar to HICs (SF 2-4).  
6  
7  
8  
9  
10

## 11 **Discussion**

12  
13  
14 To our knowledge, the ISDELTSB is the first empirical study aiming to assemble a minimum set of  
15  
16 consensus based and widely used terms and definitions to describe suicidal phenomena. The results  
17  
18 of the present study could give a contribution in this direction, while also looking at differences  
19  
20 between HICs and LMICs regarding terminologies used. The answers of survey participants regarding  
21  
22 the four characteristics of the definition of suicide could delineate some level of consensus. Regarding  
23  
24 outcome, all respondents agreed that *suicide is an act resulting in death*. This sets a clear distinction  
25  
26 between suicide and non-fatal suicidal behaviours and corresponds to the majority of definitions of  
27  
28 suicide found in the literature.<sup>10</sup>  
29  
30  
31

32  
33 Regarding intent, more than half of respondents agreed that suicide could be undertaken *without*  
34  
35 explicit intent to die, despite the fact that, only a few definitions of suicide do not mention intent to  
36  
37 die as a central characteristic of the act.<sup>1,11,12</sup> In De Leo et al.'s<sup>6</sup> definition, intent targeted “wanted  
38  
39 changes” (p. 12). These authors argued that intent to die - assumed to be at least in minimal part  
40  
41 present (i.e. greater than zero) - can be concurrent with other purposes, and that people attempting  
42  
43 suicide may even be trying to improve their life or have other underlying motives, such as escaping  
44  
45 from an unbearable situation. According to the answers to our survey, *suicide is an act in which intent*  
46  
47 *may not be explicit but ambiguous and unclear, and involving the risk of dying*.  
48  
49  
50

51  
52 In the literature, knowledge of potentially fatal outcome was often suggested as a requirement for the  
53  
54 definition of suicide.<sup>9,13</sup> In the present survey, according to the vast majority of respondents, *suicide is*  
55  
56 *an act carried out with the knowledge of a potentially fatal result*.  
57  
58  
59  
60



1  
2  
3 The respondents stressed the importance of distinguishing suicide from assisted suicide and  
4  
5 euthanasia. Generally, they expressed the choice for a definition excluding the possibility of an outside  
6  
7 agent. This appears in contradiction with most literature (e.g.,<sup>9</sup>). According to most respondents in this  
8  
9 study, *suicide is an act initiated and carried out by oneself to the end of the action*. However, in our  
10  
11 view, if widely accepted, this determination could lead to several problems, contributing to a  
12  
13 substantial underestimation of suicide mortality. For instance, an act in which a person stands in front  
14  
15 of a moving object (e.g., a train or a truck driven by another person) could hardly be considered as  
16  
17 *assisted suicide*. Keeping in mind the limitations of the present survey (e.g., representativeness of the  
18  
19 sample; clarity of vignettes; deepening of details, etc.), the indications coming from this area of our  
20  
21 study seem to emphasize the importance of a shared set of definitions among scholars in the field of  
22  
23 suicide. The discrepancy detected at the level of definition of suicide among study participants is of  
24  
25 relevance and underlines the appropriateness of research efforts in the definitional domain. Indeed, if  
26  
27 we identify what varies and explain why, we should equally succeed in identifying what does not, i.e.,  
28  
29 shared terms and definitions. Further research should thus use the same methodology and focus on a  
30  
31 wider sample of professionals working in the field.  
32  
33  
34  
35

36  
37 Evidence of intent to die is central to the definition of 'suicide attempt', a behaviour in which *a person*  
38  
39 *harms him- or her-self, with the intention to die, and survives*, and is in agreement with the existing  
40  
41 literature.<sup>1,2,14</sup> The term 'suicide attempt' was deemed acceptable in a wide scale survey and  
42  
43 recommended for academic and media use.<sup>15</sup> 'Self-harm' was the preferred term in cases in which  
44  
45 there was no evidence of intent to die (i.e., vignette 2) and elicited less disagreement than 'suicide  
46  
47 attempt' when intent could not be determined (i.e., vignettes 4 and 5). In the literature, 'self-harm'  
48  
49 and 'deliberate self-harm' have been described either in absence of suicidal intent<sup>3,16,17</sup> or regardless  
50  
51 of suicidal intent.<sup>18,19</sup> The term '*deliberate self-harm*' was not favoured in respondents' answers; their  
52  
53 comments suggested that it could be stigmatizing. The term 'self-harm' could thus be defined as a *non-*  
54  
55 *fatal act in which a person harms him- or her-self, and intent to die is either absent or not accessible to*  
56  
57 *observation*. The question remains as to whether this term could be placed in an overarching position  
58  
59  
60

1  
2  
3 in a nomenclature, regardless of the level of intent to die (thus including 'suicide attempt'). Statement  
4 of intent differs depending on the person interviewed (e.g., patient, family, or clinician) and timing of  
5 the interview (e.g., intent to die could be masked or denied when the patient becomes aware of the  
6 possibility of being admitted to a locked inpatient unit). For example, Kapur et al.<sup>20</sup> argued against  
7 distinguishing acts of self-harm according to intent.  
8  
9  
10  
11  
12

13  
14  
15 Based on the current results, if intent to die has been stated by the patient, it may be more appropriate  
16 to consider the term 'suicide attempt' rather than 'self-harm', even if it seems to contradict the  
17 definition of suicide resulting from this survey. One might imagine another term for fatal suicidal  
18 behaviour in which evidence is not clear (e.g., 'fatal self-harm'); however, respondents did not suggest  
19 a term for this specific situation.  
20  
21  
22  
23  
24  
25

26  
27 Regarding 'suicidal ideation', Silverman et al.<sup>7</sup> distinguished between 'no ideation' vs. 'undetermined  
28 degree' vs. 'some suicidal intent', and further subdivided the categories into 'casual', 'transient',  
29 'passive', 'active', and 'persistent'. The responses to our survey suggest a rather inclusive definition of  
30 'suicidal ideation': *Thinking of suicide with or without suicidal intent; hoping for death by killing oneself;*  
31 *and, stating the presence of suicidal intention without engaging in behaviour.* Further research may  
32 consider sub-dividers such as *with/without suicidal intent, transient, reactive, persistent, or with*  
33 *communication.*  
34  
35  
36  
37  
38  
39  
40  
41  
42

43 'Death wishes' were defined by respondents as *hoping for death without thoughts of killing oneself,*  
44 and were less inclusive than Balaguer et al.'s<sup>21</sup> 'wish to hasten death', which was an overarching  
45 category including suicidal ideation.  
46  
47  
48  
49

50  
51 O'Carroll et al.<sup>6</sup> defined 'suicide threat' as *"any interpersonal action, verbal or nonverbal, stopping*  
52 *short of a directly self-harmful act that a reasonable person would interpret as communicating or*  
53 *suggesting that a suicidal act or other suicide-related behaviour might occur in the near future"* (p.  
54 247). Silverman et al.<sup>7</sup> defined this term in a similar way. Vignette 12 was a case scenario designed to  
55  
56  
57  
58  
59  
60

1  
2  
3 illustrate this definition. However, many participants did not respond to this vignette, and the  
4  
5 significant disagreement between groups should lead to caution in interpreting results.  
6  
7

8 Based on responses to our survey, a 'suicide plan' could be defined as *having decided how and when*  
9  
10 *to perform a suicidal act*. This definition is comparable to that of Silverman et al.,<sup>7</sup> which does not  
11  
12 include preparatory behaviour. A suggested definition should thus exclude *active preparation*.  
13  
14

15  
16 Despite some disagreement between respondents, 'preparatory suicidal behaviour' could be defined  
17  
18 as *preparing for a suicidal act (e.g. collecting pills, buying a gun, attaching a rope, visiting a bridge),*  
19  
20 *but without initiating it and thus not sustaining any injury*. This definition is similar to that given by  
21  
22 Posner et al.<sup>22</sup> However, these authors also considered 'aborted' and 'interrupted suicide attempt' and  
23  
24 thus a *preparatory act* was an umbrella term, which was not the case for our survey. Based on results,  
25  
26 an 'aborted suicide attempt' could be defined as an act in which a person *initiates a suicidal act (e.g.*  
27  
28 *stands or sits on the edge of a high bridge; ties a rope around his or her neck; etc.), but stops him/herself*  
29  
30 *before sustaining any injury* (Vignette 15).  
31  
32

33  
34 An 'interrupted suicide attempt' could be defined as *initiating a suicidal act (e.g. standing or sitting on*  
35  
36 *the edge of a high bridge, tying a rope around one's neck), but being stopped by someone else before*  
37  
38 *sustaining any injury* (vignette 16). These definitions are indeed comparable to those reported by  
39  
40 Posner et al.<sup>22</sup>  
41  
42

#### 43 44 *Differences between HICs and LMICs*

45  
46  
47 Access to resources (e.g., local research activity) could have an influence on terminology. Therefore, it  
48  
49 was expected that the level of national income has an influence on preferred terminology of the  
50  
51 respondents, considering the fact that HICs have more resources for professionals working in  
52  
53 suicidology, advanced health care systems, and more academic and research background than LMICs.  
54  
55 Furthermore, there are notable historical and cultural differences (e.g. religious), which could have  
56  
57  
58  
59  
60

1  
2  
3 further impact on the terminology. Nevertheless, lack of previous empirical studies did not enable us  
4  
5 to propose a clear testable hypothesis.  
6  
7

8 However, our results identified some notable differences between respondents from LMICs and HICs.  
9  
10 Respondents from HICs were more likely to agree that, in suicide, intent may be ambiguous or unclear.  
11  
12 Differences in responses to vignette 4 (i.e., non-fatal suicidal behaviour, but person cannot state  
13  
14 intentions) could suggest that respondents from LMICs did not distinguish non-fatal behaviours as  
15  
16 precisely regarding intent as respondents from HICs, who were more likely to name the behaviour  
17  
18 'self-harm.' Interestingly in Vignette 6 (i.e. fatal suicidal behaviour with no evidence of intent),  
19  
20 respondents from HICs were more likely to choose 'undetermined death' rather than 'suicide', which  
21  
22 was somewhat in contradiction with an open definition of suicide regarding intent. Some differences  
23  
24 were found for Vignette 11, 12 and 14, but none of these related to a pattern in which respondents  
25  
26 form HICs had more precise terminology than respondents from LMICs. Overall, no clear differential  
27  
28 pattern could be evidenced in responses given for the four characteristics of suicide, and respondents  
29  
30 from LMICs had an equal range of terms to name the behaviours in the vignettes.  
31  
32  
33  
34  
35  
36  
37  
38

### 39 *Strengths and limitations*

40  
41  
42 Representatives of 63 countries (slightly less than a third of all 193 WHO member countries)  
43  
44 participated in the ISDELTBSB. If any nomenclature has to be internationally applicable, efforts should  
45  
46 be dedicated to increasing the number of countries taking part in this type of research, especially  
47  
48 among LMICs. It should be noted that seven out of 30 LMICs (23%) had a national suicide prevention  
49  
50 strategy, compared to 15 out of 33 HICs (45%). Yet, despite their relatively low number, participating  
51  
52 countries account for two thirds of the world population and three quarters of all suicides.<sup>23</sup>  
53  
54  
55

56 LMICs were represented by 37 and HICs by 89 respondents, which implies a bias towards responses  
57  
58 from HICs and the analysis showed a few notable differences. However, we conducted additional  
59  
60

1  
2  
3 sensitivity analyses, which gave similar results. Nevertheless, the relatively high number of LMICs  
4 included in the study was achieved by using a recruitment approach based on institutionally- and self-  
5 defined expertise. The fact that there was no operational definition regarding expertise in suicidology  
6 is another limitation to our study. However, differences between the HICs are also very likely.  
7  
8  
9

10  
11  
12 The initial idea of using one 'representative' per country (the IASP national delegate) was chosen to  
13 give comparable weight to all participating countries. Poor response to initial recruitment efforts led  
14 to our extending participation to individual members of IASP. However, the final number of  
15 participants remained quite low; the obtained results thus need to be replicated in studies with bigger  
16 samples.  
17  
18  
19  
20  
21  
22

23  
24 As mentioned in the companion paper on methodology,<sup>3</sup> the questionnaire was not translated into  
25 different languages but presented in English. This has probably limited participation to the study; in  
26 addition, it may have led to discrepancies in understanding questions. We need to acknowledge that  
27 all conclusions should be taken with caution.  
28  
29  
30  
31  
32  
33

### 34 35 36 37 38 *Implications for further research*

39  
40 Table 1 collates the most frequently chosen terms together, with their matching definition. The  
41 resulting nomenclature can be considered as an attempt at promoting consensus in a wide range of  
42 cultural settings. It tries to encompass the whole range of suicidal behaviours and ideation. However,  
43 as mentioned above, not everything comes as crystal clear. For example, suicide was frequently  
44 interpreted as an act performed to completion by the actor itself, not involving a third agent. Intent to  
45 die appears as necessary to define a suicide attempt, but intent can be vague or unclear for a suicide.  
46  
47 There are terms that may receive an overarching character. For instance, 'self-harm' may include  
48 behaviours in which there is no intent to die and those in which intent is unknown.  
49  
50  
51  
52  
53  
54  
55  
56  
57  
58  
59  
60

1  
2  
3 The 'preparatory suicidal behaviour' category could include both 'aborted' and 'interrupted suicide  
4 attempt' or, as suggested in our survey, these may be treated as distinct, owing to differences in the  
5 moment in which the behaviour stops (i.e. after preparations are finished or after the suicidal act is  
6 initiated).  
7  
8  
9  
10

11  
12 The nomenclature presented in Table 1 should thus be considered as a working base to advance in the  
13 direction of a universal classification of suicidal behaviours.  
14  
15  
16

17  
18 - Please insert Table 1  
19  
20  
21  
22  
23

## 24 **Conclusion**

25  
26 The development of an internationally applicable nomenclature and classification of suicidal  
27 behaviours would be a long and complex process. The IASP Special Interest Group on Nomenclature  
28 would be ideally positioned to carry out this task with the help of a large and motivated international  
29 membership. Using the results of an international opinion survey, a tentative nomenclature of suicidal  
30 behaviour is proposed. Indications from this survey may be utilized by the Special Interest Group.  
31  
32 Future developments could then be tested in large samples of professionals (e.g., clinicians,  
33 researchers), with particular attention to intercultural and interdisciplinary representativeness. One of  
34 the challenges of this process would be the involvement of LMICs, keeping in mind that online surveys  
35 like ours have only moderate success in representing LMICs.<sup>24</sup>  
36  
37  
38  
39  
40  
41  
42  
43  
44  
45  
46  
47  
48  
49  
50  
51  
52  
53  
54  
55  
56  
57  
58  
59  
60

## Acknowledgements

For their assistance in recruiting participants and distributing the questionnaire we are extremely grateful to IASP Administrative Officers, Wendy Orchard and Wendy Cliff; Professor Roy Abraham Kallivayalil, Secretary General at the WPA, as well as the WPA team; Professor Chris Dowrick, Chair of Working Party for Mental Health at WONCA, as well as the WONCA team. We would also like to acknowledge all those who participated in ISDELTSB ©: Dr Bashir Sarwari, Dr Ernesto Ruben Paez, Dr Jo Robinson, Dr Thomas Niederkrotenthaler, Dr Gwendolyn Portzky, Dr Daravuth Yel, Professor Jie Zhang, Dr Marta Ardilla, Dr Annette Erlangsen, Professor Merike Sisask, Dr Stephane Amadeo, Dr Reinhard Lindner, Professor Charity Akotia, Professor Christos Lionis, Dr Frances Yik Wa Law, Dr Sandor Fekete, Dr Wilhelm Nordfjord, Professor Seyed Kazem Malakouti, Dr Marco Innamorati, Dr Chiaki Kawanishi, Miss Merab Mulindi, Professor Elie Karam, Dr Paulius Skruibis, Mrs Neeteeyavathee Appadoo, Dr Liuba Ceban, Dr Remco De Winter, Dr Sylvia Huitson, Dr Alexandre Teixeira, Dr Linnette Rodriguez Figueroa, Dr. Suhaila Ghuloum, Miss Dana-Cristina Herta, Ms Anna-Lisa Labiche, Dr Vita Postuvan, Mr Andoni Ansean , Dr Gergo Hadlaczky, Assistant Professor Prakarn Thomyangkoon, Dr Puloka mapa haano, Professor Gerard Hutchinson, Dr James Mughisha, Professor Vsevolod Rozanov, Dr Bianca Hedge, Professor Madelyn Gould, Dr Silvia Peláez, Dr Alan Apter, Professor Ad Kerkhof, Dr Siegrid Darquet, Professor José Manoel Bertolote, Dr. Benedikt Till, Professor Michel Tousignant, Dr Tracy McCown, Dr M M Jalal Uddin, Professor Øivind Ekeberg, Mr Bronwen Edwards, Dr Priya Sreedaran, Dr Mitsuhiro Yamada, Mrs Karen Lascelles, Professor Jean Pierre Soubrier, Mrs Angela Clapperton, Dr. Tracey King, Dr. Ann Luce, Professor Stephen Platt, Dr Daniel Reidenberg, Mr Dean Martin, Ms Eleanor Bailey, Mr Barry Taylor, Mrs Ann Evans, Mrs Karen Scavacini, Mr Gert Jessen, Mrs Diana Rucli, Dr. Chencho Dorji, Dr Saska Roskar, Dr John Draper, Dr Nathaniel Pollock, Dr Aggrey Burke, Dr Freddy Vasquez, Professor William Feigelman, Mr Sean McCarthy, Luis Miguel Sánchez-Loyo, Mr Andrew Humphreys, Dr Gabriela Silva de Malafaia, Mrs Christine Genest, Professor Chan Lai Fong, Professor Deborah Goebert, Mrs Veronica Rose Marshall Bernard, Mrs. Lakshmi Ratnayeke, Mr Ricardo Gusmão, Professor Chris G. Caulkins, Ms Jill Fisher, Professor Thomas Bronisch, Mr Ernest Garnark

1  
2  
3 Smith Jr., Dr Ellyson Stout, Professor Merete Nordentoft, Dr Zonda Tamás, Mrs Christine Wong, Rev.  
4  
5 Cody Cooper, Dr Pandit Devjyoti Sharma, Mrs Sally Morris, Ms Nicole Hill, Dr Kate Fairweather-Schmidt,  
6  
7 Professor Ping Qin, Professor Ian R.H. Rockett, Dr Maree Inder, Dr Gabrielle Jenkin, Dr Liv Mellesdal,  
8  
9 Mr Thomas Tarurongo Wynne, Mrs Lena Lenehan, Professor Yueqin Huang, Dr Derek de Beurs, Ms  
10  
11 Uzma Irfan, Ms Rosina Acharya. We also thank all those participants who wished to remain  
12  
13 anonymous.  
14  
15

### 16 17 **Funding**

18  
19  
20 None  
21  
22

### 23 **Conflicts of interest**

24  
25 No conflicts to declare.  
26  
27

### 28 **Data availability**

29  
30 Data can be made available upon a reasonable request.  
31  
32

### 33 **Author contributorship**

34  
35  
36 DDL originated the study idea and design, designed and critically reviewed the questionnaire,  
37  
38 interpreted data and drafted the manuscript. BG helped design the study, designed the questionnaire,  
39  
40 analysed and interpreted data and drafted the manuscript. MS, AB, JM, EA, KH, MP and LV contributed  
41  
42 to the methodology, reviewed the questionnaire, interpretation of data and critically reviewed the  
43  
44 manuscript. KA, AMCH and MH contributed to the interpretation of data and critically reviewed the  
45  
46 manuscript. KK helped design the study, helped design and critically reviewed the questionnaire,  
47  
48 analysed and interpreted data and critically reviewed the manuscript.  
49  
50  
51  
52  
53  
54  
55  
56  
57  
58  
59  
60



## References

1. Beck, A., T., Davis, J., H., Frederick, C., J., Perlin, S., Pokorny, A., D., Schulman, R., E., et al. (1973). Classification and Nomenclature. In H. L. P. Resnik & B. C. Hathorne (Eds.), *Suicide Prevention in the 70's* (pp. 7-12): Center for Studies of Suicide Prevention, National Institute of Mental Health.
2. O'Carroll, P., W., Berman, A. L., Maris, R. W., Moscicki, E. K., Tanney, B. L., & Silverman, M. M. (1996). Beyond the Tower of Babel: a nomenclature for suicidology. *Suicide Life Threat Behav*, 26(3), 237-252.
3. Silverman, M. M., Berman, A. L., Sanddal, N. D., O'Carroll P, W., & Joiner, T. E. (2007). Rebuilding the tower of Babel: a revised nomenclature for the study of suicide and suicidal behaviors. Part 2: Suicide-related ideations, communications, and behaviors. *Suicide Life Threat Behav*, 37(3), 264-277.
4. Goodfellow, B., Kölves, K., & De Leo, D. (2018). Contemporary nomenclatures of suicidal behaviors: a systematic literature review. *Suicide Life Threat Behav*, 48(3), 353-366.
5. Goodfellow, B., Kölves, K., & De Leo, D. (2020). Contemporary classifications of suicidal behavior: a systematic literature review. *Crisis*, 41(3), 179-186.
6. World Health Organization. (2016a). International Classification of Diseases (ICD). Retrieved from: <http://www.who.int/classifications/icd/en/> 26 May 2020
7. Silverman, M. M., & De Leo, D. (2016). Why there is a need for an international nomenclature and classification system for suicide. *Crisis*, 37(2), 83-87.
8. World Health Organization. (2018). National suicide prevention strategies: progress, examples and indicators. (9241515015). Retrieved from: [https://www.who.int/mental\\_health/suicide-prevention/national\\_strategies\\_2019/en/](https://www.who.int/mental_health/suicide-prevention/national_strategies_2019/en/) 21 April 2020
9. Goodfellow, B., Kölves, K., & De Leo, D. (2019). Contemporary definitions of suicidal behavior: a systematic literature review. *Suicide Life-Threat Behav*, 49(2), 488-504.

- 1  
2  
3 10. Goodfellow, B., Kölves, K., De Leo, D., Silverman, M., M., Berman, A., Mann, J., et al. (2019).  
4  
5 International Study of Definitions and Terms for Suicidal Behaviors ©: Protocol of an opinion  
6  
7 survey. *BMJ Open*, 2019; 9:e025770. doi:10.1136/ bmjopen-2018-025770.  
8  
9  
10 11. Baechler, J. (1980). A strategic theory. *Suicide Life Threat Behav* 10(2), 70-99.  
11  
12 12. Egel, L. (1999). On the need for a new term for suicide. *Suicide Life Threat Behav*, 29(4), 393-  
13  
14 394.  
15  
16 13. De Leo, D., Burgis, S., Bertolote, J. M., Kerkhof, A. J., & Bille-Brahe, U. (2006). Definitions of  
17  
18 suicidal behavior: lessons learned from the WHO/EURO multicentre Study. *Crisis*, 27(1), 4-15.  
19  
20 14. Stengel, E. (1964). The suicidal attempt as a behaviour pattern, and its definition. In E. Stengel  
21  
22 (Ed.), *Suicide and Attempted Suicide* (pp. 67-73). London: Penguin Books.  
23  
24 15. Padmanathan, P., Biddle, L., Hall, K., Scowcroft, E., Nielsen, E., & Knipe, D. (2019). Language  
25  
26 use and suicide: An online cross-sectional survey. *PLoS one*, 14(6), e0217473.  
27  
28 16. Mangnall, J., & Yurkovich, E. (2008). A literature review of deliberate self-harm. *Perspect*  
29  
30 *Psychiatr Care*, 44(3), 175-184.  
31  
32 17. Marusic, A. (2004). Toward a new definition of suicidality? Are we prone to Fregoli's illusion?  
33  
34 *Crisis*, 25(4), 145-146.  
35  
36 18. Dear, G. E. (2001). Further comments on the nomenclature for suicide-related thoughts and  
37  
38 behavior. *Suicide Life Threat Behav*, 31(2), 234-235.  
39  
40 19. Hawton, K., Harriss, L., Hall, S., Simkin, S., Bale, E., & Bond, A. (2003). Deliberate self-harm in  
41  
42 Oxford, 1990–2000: a time of change in patient characteristics. *Psychol Med*, 33(6), 987-995.  
43  
44 20. Kapur, N., Cooper, J., O'Connor, R. C., & Hawton, K. (2013). Non-suicidal self-injury v.  
45  
46 attempted suicide: new diagnosis or false dichotomy? *Br J Psychiatry*, 202(5), 326-328.  
47  
48 21. Balaguer, A., Monforte-Royo, C., Porta-Sales, J., Alonso-Babarro, A., Altisent, R., Aradilla-  
49  
50 Herrero, A., et al. (2016). An international consensus definition of the wish to hasten death  
51  
52 and its related factors. *PLoS one*, 11(1), e0146184.  
53  
54  
55  
56  
57  
58  
59  
60

- 1  
2  
3 22. Posner, K., Oquendo, M. A., Gould, M., Stanley, B., & Davies, M. (2007). Columbia Classification  
4 Algorithm of Suicide Assessment (C-CASA): classification of suicidal events in the FDA's  
5 pediatric suicidal risk analysis of antidepressants. *Am J Psychiatry*, *164*(7), 1035-1043.  
6  
7  
8  
9  
10 23. World Health Organization. (2016b). Suicide data. Retrieved from:  
11 [https://www.who.int/mental\\_health/prevention/suicide/suicideprevent/en/](https://www.who.int/mental_health/prevention/suicide/suicideprevent/en/) 26 May 2020  
12  
13  
14 24. Reed, G. M., Mendonca Correia, J., Esparza, P., Saxena, S., & Maj, M. (2011). The WPA-WHO  
15 global survey of psychiatrists' attitudes towards mental disorders classification. *World*  
16 *Psychiatry*, *10*(2), 118-131.  
17  
18  
19  
20  
21  
22  
23  
24  
25  
26  
27  
28  
29  
30  
31  
32  
33  
34  
35  
36  
37  
38  
39  
40  
41  
42  
43  
44  
45  
46  
47  
48  
49  
50  
51  
52  
53  
54  
55  
56  
57  
58  
59  
60

Table 1. Recommended nomenclature of suicidal behaviours after the ISDELTSB

| <b>Designating term or expression</b> | <b>Definition</b>                                                                                                                                                                                                                                                                    |
|---------------------------------------|--------------------------------------------------------------------------------------------------------------------------------------------------------------------------------------------------------------------------------------------------------------------------------------|
| <b>Suicide</b>                        | An act resulting in death which is initiated and carried out by an individual to the end of the action, with the knowledge of a potentially fatal result, and in which intent may be ambiguous or unclear, may involve the risk of dying, or may not involve explicit intent to die. |
| <b>Suicide attempt</b>                | An act in which a person harms him- or her-self, with the intention to die, and survives.                                                                                                                                                                                            |
| <b>Self-harm</b>                      | A non-fatal act in which a person harms him- or her-self intentionally, with varying motives including the wish to die.                                                                                                                                                              |
| <b>Suicidal ideation</b>              | To think of suicide with or without suicidal intent, or hope for death by killing oneself, or state suicidal intention without engaging in behaviour.                                                                                                                                |
| <b>Death wishes</b>                   | To hope for death without thoughts of killing oneself.                                                                                                                                                                                                                               |
| <b>Suicide plan</b>                   | To have decided how and when to perform a suicidal act, but without active preparation.                                                                                                                                                                                              |
| <b>Preparatory suicidal behaviour</b> | To prepare a suicidal act (e.g. assemble pills, buy a gun, attach a rope, visit a bridge), but without initiating it and thus not sustaining any injury.                                                                                                                             |
| <b>Aborted suicide attempt</b>        | An act in which a person initiates a suicidal act (e.g. stands or sits on the edge of a high bridge, ties a rope around his or her neck), but stops him/herself before sustaining any injury.                                                                                        |
| <b>Interrupted suicide attempt</b>    | An act in which a person initiates a suicidal act (e.g. stands or sits on the edge of a high bridge, ties a rope around his or her neck), but is stopped by someone else before sustaining any injuries.                                                                             |

1  
2  
3 Figure 1. Percentage of respondents who agreed with statements regarding the definition of suicide  
4 according to national income in the ISDELTSB sample (HIC=High Income Country; LMIC=Low- and  
5 Middle-Income Country)  
6  
7  
8  
9  
10  
11  
12  
13  
14  
15  
16  
17  
18  
19  
20  
21  
22  
23  
24  
25  
26  
27  
28  
29  
30  
31  
32  
33  
34  
35  
36  
37  
38  
39  
40  
41  
42  
43  
44  
45  
46  
47  
48  
49  
50  
51  
52  
53  
54  
55  
56  
57  
58  
59  
60

For peer review only

Figure 2. Percentage of respondents agreeing to statements regarding the definition of suicidal behaviours (Vignettes 1-8) by national income in ISDTSB sample (HIC=High Income Country; LMIC=Low- and Middle-Income Country)

For peer review only

1  
2  
3  
4  
5  
6  
7  
8  
9  
10  
11  
12  
13  
14  
15  
16  
17  
18  
19  
20  
21  
22  
23  
24  
25  
26  
27  
28  
29  
30  
31  
32  
33  
34  
35  
36  
37  
38  
39  
40  
41  
42  
43  
44  
45  
46  
47  
48  
49  
50  
51  
52  
53  
54  
55  
56  
57  
58  
59  
60

1  
2  
3 Figure 3. Percentage of respondents agreeing to statements regarding the definition of suicidal  
4 behaviours (Vignettes 9-16) by national income in ISDTSB sample (HIC=High Income Country;  
5 LMIC=Low- and Middle-Income Country)  
6  
7  
8  
9  
10  
11  
12  
13  
14  
15  
16  
17  
18  
19  
20  
21  
22  
23  
24  
25  
26  
27  
28  
29  
30  
31  
32  
33  
34  
35  
36  
37  
38  
39  
40  
41  
42  
43  
44  
45  
46  
47  
48  
49  
50  
51  
52  
53  
54  
55  
56  
57  
58  
59  
60

For peer review only

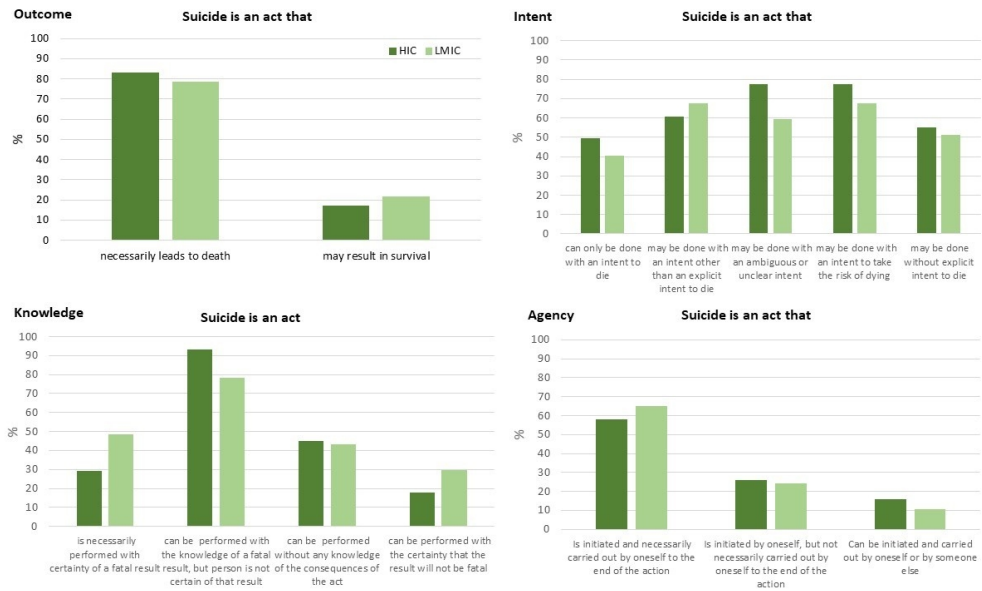

Figure 1. Percentage of respondents who agreed with statements regarding the definition of suicide according to national income in the ISDELTSB sample (HIC=High Income Country; LMIC=Low- and Middle- Income Country)

254x153mm (120 x 120 DPI)



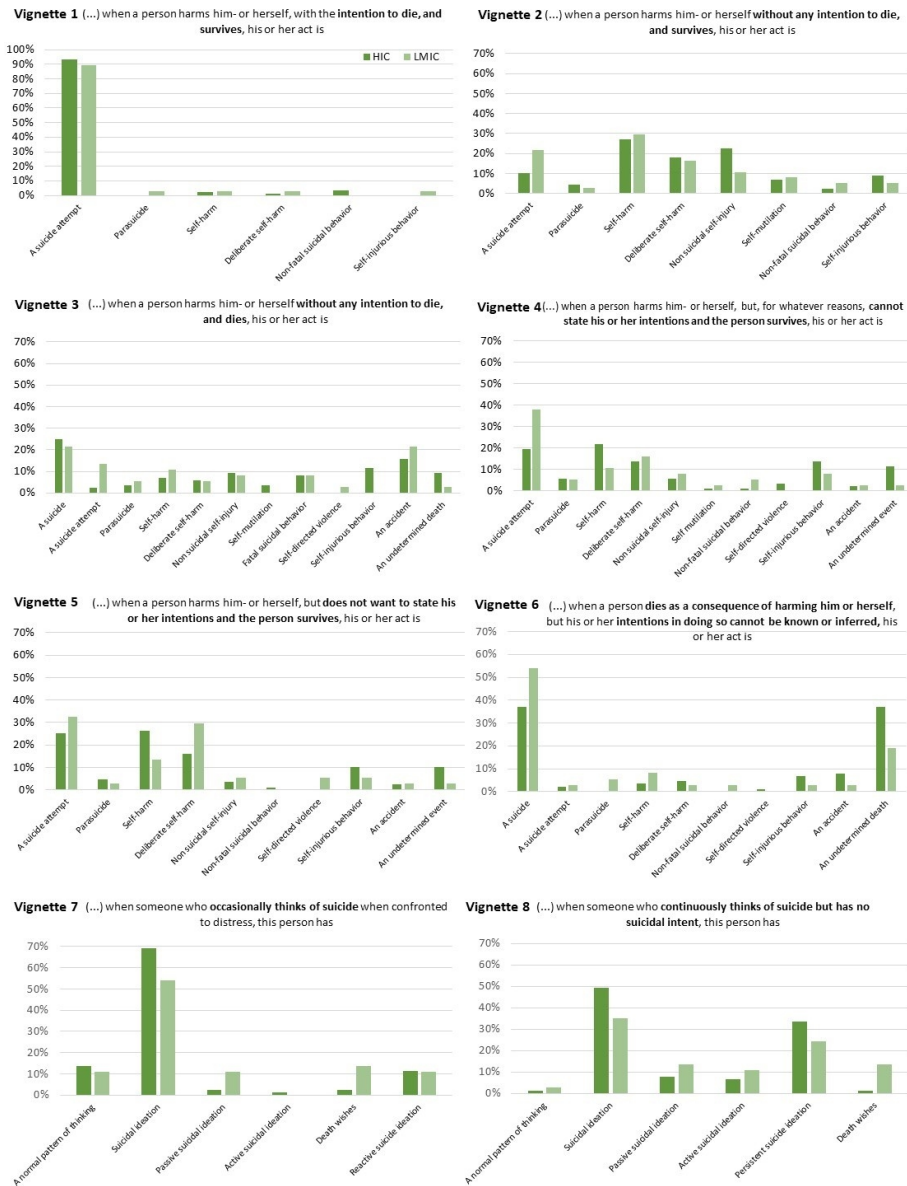

Figure 2. Percentage of respondents agreeing to statements regarding the definition of suicidal behaviours (Vignettes 1-8) by national income in ISDTSB sample (HIC=High Income Country; LMIC=Low- and Middle- Income Country)

237x308mm (120 x 120 DPI)

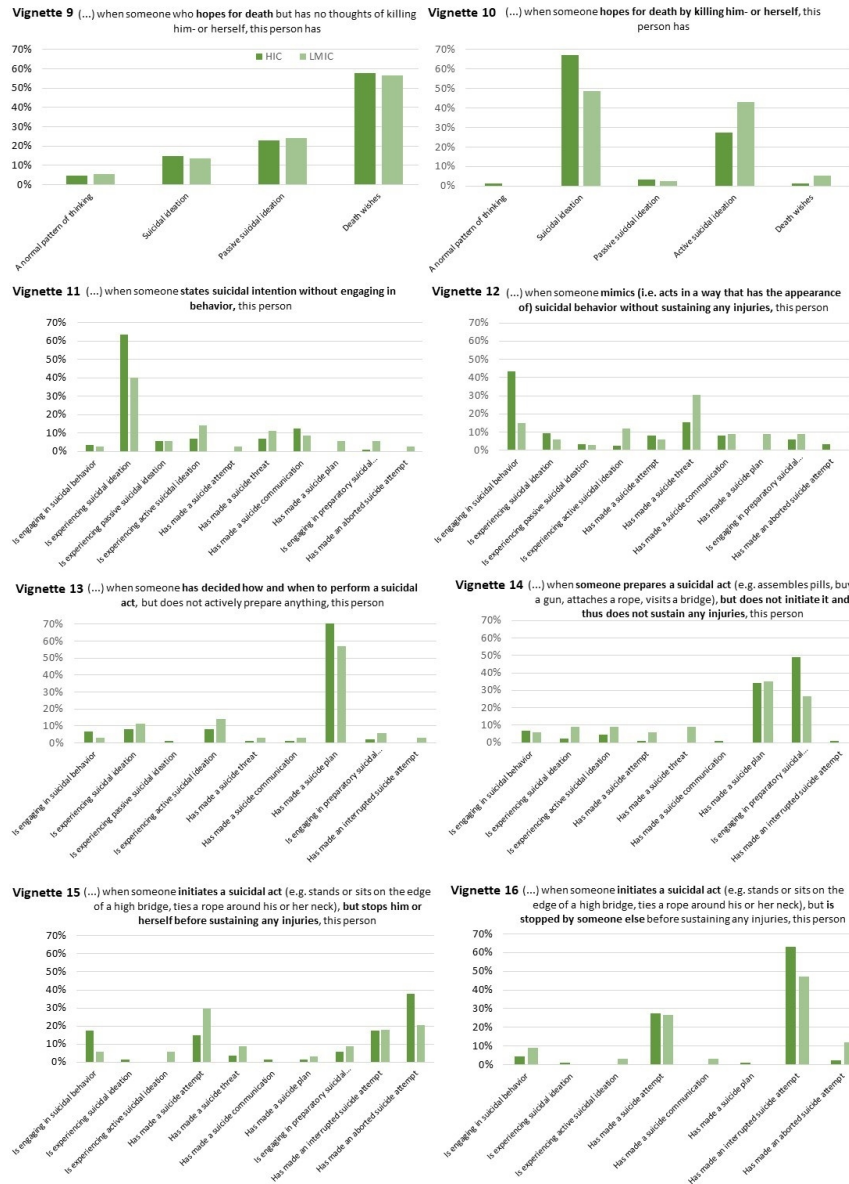

Figure 3. Percentage of respondents agreeing to statements regarding the definition of suicidal behaviours (Vignettes 9-16) by national income in ISDTSB sample (HIC=High Income Country; LMIC=Low- and Middle- Income Country)

236x324mm (120 x 120 DPI)

Supplementary Table 1. Number of respondents by country/territory that participated to the International Study of Definitions and Terms for Suicidal Behaviors ©

| Countries/territories | 'experts' | IASP members |
|-----------------------|-----------|--------------|
| Africa                |           |              |
| Ghana                 | 1         | 0            |
| Kenya                 | 1         | 0            |
| Liberia               | 0         | 1            |
| Mauritius             | 1         | 1            |
| Seychelles            | 1         | 0            |
| Uganda                | 1         | 0            |
| America               |           |              |
| Argentina             | 1         | 0            |
| Brazil                | 0         | 4            |
| Canada                | 1         | 5            |
| Colombia              | 1         | 0            |
| Mexico                | 1         | 1            |
| Peru                  | 0         | 1            |
| Puerto Rico           | 1         | 0            |
| The Bahamas           | 0         | 1            |
| Trinidad and Tobago   | 1         | 0            |
| Uruguay               | 1         | 0            |
| USA                   | 1         | 8            |
| Asia                  |           |              |
| Afghanistan           | 1         | 0            |
| Bangladesh            | 0         | 1            |
| Bhutan                | 0         | 1            |
| Cambodia              | 1         | 0            |
| China                 | 1         | 1            |
| Hong Kong             | 1         | 0            |
| India                 | 0         | 2            |
| Iran                  | 1         | 1            |
| Israel                | 0         | 1            |
| Japan                 | 1         | 1            |
| Lebanon               | 1         | 0            |
| Malaysia              | 0         | 1            |
| Nepal                 | 1         | 0            |
| Pakistan              | 1         | 0            |
| Qatar                 | 1         | 0            |
| Singapore             | 0         | 1            |
| Sri Lanka             | 0         | 1            |
| Taiwan                | 0         | 1            |
| Thailand              | 1         | 0            |
| Europe                |           |              |

|    |                  |    |    |
|----|------------------|----|----|
| 1  | Austria          | 1  | 1  |
| 2  | Belgium          | 1  | 1  |
| 3  | Denmark          | 1  | 2  |
| 4  | Estonia          | 1  | 0  |
| 5  | France           | 0  | 2  |
| 6  | Germany          | 1  | 1  |
| 7  | Greece           | 1  | 0  |
| 8  | Hungary          | 1  | 1  |
| 9  | Iceland          | 1  | 0  |
| 10 | Ireland          | 0  | 3  |
| 11 | Italy            | 1  | 1  |
| 12 | Lithuania        | 1  | 0  |
| 13 | Moldova          | 1  | 0  |
| 14 | Netherlands      | 1  | 2  |
| 15 | Norway           | 0  | 3  |
| 16 | Portugal         | 1  | 1  |
| 17 | Romania          | 1  | 0  |
| 18 | Slovenia         | 1  | 1  |
| 19 | Spain            | 1  | 0  |
| 20 | Sweden           | 1  | 1  |
| 21 | UK               | 0  | 4  |
| 22 | Ukraine          | 1  | 0  |
| 23 | Oceania          |    |    |
| 24 | Australia        | 1  | 15 |
| 25 | New Zealand      | 1  | 6  |
| 26 | Cook Islands     | 0  | 1  |
| 27 | French Polynesia | 1  | 0  |
| 28 | Tonga            | 1  | 0  |
| 29 | Total            | 46 | 80 |

1  
2  
3  
4  
5  
6  
7  
8  
9  
10  
11  
12  
13  
14  
15  
16  
17  
18  
19  
20  
21  
22  
23  
24  
25  
26  
27  
28  
29  
30  
31  
32  
33  
34  
35  
36  
37  
38  
39  
40  
41  
42  
43  
44  
45  
46  
47  
48  
49  
50  
51  
52  
53  
54  
55  
56  
57  
58  
59  
60

Supplementary Figure 1: Participating countries in the International Study of Definitions and Terms of Behavior



Created with mapchart.net ©

Supplementary Table 2. Individual and country-based results by main components of suicide definition

|                                                                                                                        | Individual based |       | Country based* |                   |
|------------------------------------------------------------------------------------------------------------------------|------------------|-------|----------------|-------------------|
|                                                                                                                        | N                | %     | N              | %                 |
| <b>Outcome (one item)</b>                                                                                              |                  |       |                |                   |
| Suicide is an act that necessarily leads to death                                                                      | 102              | 81.6% | 52             | 81.7%             |
| ... may result in survival                                                                                             | 23               | 18.4% | 11             | 18.2%             |
| Missing                                                                                                                | 1                |       | 0              |                   |
| <b>Intent (five separate items)</b>                                                                                    |                  |       |                |                   |
| Suicide is an act that can only be done with an intent to die                                                          | 59               | 46.8% | 26             | 41.7%             |
| Suicide is an act that may be done with an intent other than an explicit intent to die                                 | 79               | 62.7% | 44             | 69.4%             |
| Suicide is an act that may be done with an ambiguous or unclear intent                                                 | 91               | 72.2% | 46             | 73.2%             |
| Suicide is an act that may be done with an intent to take the risk of dying                                            | 93               | 74.4% | 49             | 77.5% (missing=1) |
| Suicide is an act that may be done without explicit intent to die                                                      | 68               | 54.0% | 34             | 53.9%             |
| <b>Knowledge (four separate items)</b>                                                                                 |                  |       |                |                   |
| Suicide is an act that is necessarily performed with certainty of a fatal result                                       | 44               | 34.9% | 26             | 41.2%             |
| Suicide is an act that can be performed with the knowledge of a fatal result, but person is not certain of that result | 112              | 88.9% | 55             | 87.1%             |
| Suicide is an act that can be performed without any knowledge of the consequences of the act                           | 56               | 44.4% | 26             | 41.9%             |
| Suicide is an act that can be performed with the certainty that the result will not be fatal                           | 27               | 21.4% | 16             | 26.1%             |
| <b>Agency (one item)</b>                                                                                               |                  |       |                |                   |
| Suicide is an act that is initiated and necessarily carried out by oneself to the end of the action                    | 75               | 60.0% | 40             | 64.2%             |
| ... is initiated by oneself, but not necessarily carried out by oneself to the end of the action                       | 32               | 25.6% | 15             | 24.3%             |
| ... can be initiated and carried out by oneself or by someone else                                                     | 18               | 14.4% | 8              | 12.3%             |
| Missing                                                                                                                | 1                |       | 1              |                   |

\*sensitivity analyses (calculated using weights)

Supplementary Table 3. Individual and country-based results of Vignettes

|                                                                                                                                                                                             | Individual based |       | Country based* |       |
|---------------------------------------------------------------------------------------------------------------------------------------------------------------------------------------------|------------------|-------|----------------|-------|
| <b>Vignette 1.</b> In your country, when professionals (e.g. clinicians, researchers) talk about a person harms him- or herself, with the intention to die, and survives, his or her act is |                  |       |                |       |
|                                                                                                                                                                                             | N                | %     | N              | %     |
| A suicide attempt                                                                                                                                                                           | 116              | 92.1% | 57             | 90.9% |
| Parasuicide                                                                                                                                                                                 | 1                | 0.8%  | 1              | 1.6%  |
| Self-harm                                                                                                                                                                                   | 3                | 2.4%  | 2              | 3.7%  |
| Deliberate self-harm                                                                                                                                                                        | 2                | 1.6%  | 1              | 0.9%  |
| Non-fatal suicidal behavior                                                                                                                                                                 | 3                | 2.4%  | 1              | 1.3%  |
| Self-injurious behavior (including self-poisoning/overdosing with medication)                                                                                                               | 1                | 0.8%  | 1              | 1.6%  |
| <b>Vignette 2.</b> (...) when a person harms him- or herself without any intention to die, and survives, his or her act is                                                                  |                  |       |                |       |
|                                                                                                                                                                                             | N                | %     | N              | %     |
| A suicide attempt                                                                                                                                                                           | 17               | 13.5% | 11             | 17.7% |
| Parasuicide                                                                                                                                                                                 | 5                | 4.0%  | 4              | 5.8%  |
| Self-harm                                                                                                                                                                                   | 35               | 27.8% | 19             | 29.6% |
| Deliberate self-harm                                                                                                                                                                        | 22               | 17.5% | 9              | 14.0% |
| Non suicidal self-injury                                                                                                                                                                    | 24               | 19.0% | 8              | 12.2% |
| Self-mutilation                                                                                                                                                                             | 9                | 7.1%  | 4              | 6.9%  |
| Non-fatal suicidal behavior                                                                                                                                                                 | 4                | 3.2%  | 3              | 4.0%  |
| Self-injurious behavior (including self-poisoning/overdosing with medication)                                                                                                               | 10               | 7.9%  | 6              | 9.8%  |
| <b>Vignette 3.</b> (...) when a person harms him- or herself without any intention to die, and dies, his or her act is                                                                      |                  |       |                |       |
|                                                                                                                                                                                             | N                | %     | N              | %     |
| A suicide                                                                                                                                                                                   | 30               | 24.0% | 17             | 26.7% |
| A suicide attempt                                                                                                                                                                           | 7                | 5.6%  | 5              | 7.8%  |
| Parasuicide                                                                                                                                                                                 | 5                | 4.0%  | 3              | 5.1%  |
| Self-harm                                                                                                                                                                                   | 10               | 8.0%  | 5              | 8.4%  |
| Deliberate self-harm                                                                                                                                                                        | 7                | 5.6%  | 3              | 4.8%  |
| Non suicidal self-injury                                                                                                                                                                    | 11               | 8.8%  | 4              | 6.8%  |
| Self-mutilation                                                                                                                                                                             | 3                | 2.4%  | 2              | 2.4%  |
| Fatal suicidal behavior                                                                                                                                                                     | 10               | 8.0%  | 5              | 8.4%  |
| Self-directed violence                                                                                                                                                                      | 1                | 0.8%  | 1              | 1.6%  |
| Self-injurious behavior (including self-poisoning/overdosing with medication)                                                                                                               | 10               | 8.0%  | 3              | 5.4%  |
| An accident                                                                                                                                                                                 | 22               | 17.6% | 11             | 17.5% |
| An undetermined death (open verdict)                                                                                                                                                        | 9                | 7.2%  | 3              | 4.8%  |
| Missing                                                                                                                                                                                     | 1                |       | 0              |       |
| <b>Vignette 4.</b> (...) when a person harms him- or herself, but, for whatever reasons, cannot state his or her intentions and the person survives, his or her act is                      |                  |       |                |       |
|                                                                                                                                                                                             | N                | %     | N              | %     |
| A suicide attempt                                                                                                                                                                           | 31               | 25.0% | 20             | 32.2% |
| Parasuicide                                                                                                                                                                                 | 7                | 5.6%  | 4              | 7.1%  |
| Self-harm                                                                                                                                                                                   | 23               | 18.5% | 9              | 15.3% |
| Deliberate self-harm                                                                                                                                                                        | 18               | 14.5% | 8              | 13.4% |
| Non suicidal self-injury                                                                                                                                                                    | 8                | 6.5%  | 3              | 5.3%  |
| Self mutilation                                                                                                                                                                             | 2                | 1.6%  | 1              | 2.2%  |
| Non-fatal suicidal behavior                                                                                                                                                                 | 3                | 2.4%  | 1              | 1.4%  |
| Self-directed violence                                                                                                                                                                      | 3                | 2.4%  | 1              | 1.8%  |

|   |                                                                               |    |       |   |      |
|---|-------------------------------------------------------------------------------|----|-------|---|------|
| 1 | Self-injurious behavior (including self-poisoning/overdosing with medication) | 15 | 12.1% | 6 | 9.6% |
| 2 | An accident                                                                   | 3  | 2.4%  | 3 | 4.8% |
| 3 | An undetermined event                                                         | 11 | 8.9%  | 4 | 6.8% |
| 4 | Missing                                                                       | 2  |       | 1 |      |

5  
6 **Vignette 5.** (...) when a person harms him- or herself, but does not want to state his or her intentions and the person survives, his or her act is

| 9  |                                                                               | N  | %     | N  | %     |
|----|-------------------------------------------------------------------------------|----|-------|----|-------|
| 10 | A suicide attempt                                                             | 34 | 27.4% | 21 | 34.3% |
| 11 | Parasuicide                                                                   | 5  | 4.0%  | 3  | 4.8%  |
| 12 | Self-harm                                                                     | 28 | 22.6% | 12 | 19.1% |
| 13 | Deliberate self-harm                                                          | 25 | 20.2% | 12 | 19.9% |
| 14 | Non suicidal self-injury                                                      | 5  | 4.0%  | 2  | 3.6%  |
| 15 | Non-fatal suicidal behavior                                                   | 1  | 0.8%  | 0  | 0.1%  |
| 16 | Self-directed violence                                                        | 2  | 1.6%  | 1  | 1.6%  |
| 17 | Self-injurious behavior (including self-poisoning/overdosing with medication) | 11 | 8.9%  | 4  | 5.9%  |
| 18 | An accident                                                                   | 3  | 2.4%  | 3  | 4.8%  |
| 19 | An undetermined event                                                         | 10 | 8.1%  | 4  | 5.7%  |
| 20 | Missing                                                                       | 2  |       | 1  |       |

21  
22 **Vignette 6.** (...) when a person dies as a consequence of harming him or herself, but his or her intentions in doing so cannot be known or inferred, his or her act is

| 27 |                                                                               | N  | %     | N  | %     |
|----|-------------------------------------------------------------------------------|----|-------|----|-------|
| 28 | A suicide                                                                     | 53 | 42.1% | 33 | 52.3% |
| 29 | A suicide attempt                                                             | 3  | 2.4%  | 2  | 3.3%  |
| 30 | Parasuicide                                                                   | 2  | 1.6%  | 2  | 3.2%  |
| 31 | Self-harm                                                                     | 6  | 4.8%  | 3  | 4.3%  |
| 32 | Deliberate self-harm                                                          | 5  | 4.0%  | 3  | 4.3%  |
| 33 | Non-fatal suicidal behavior                                                   | 1  | 0.8%  | 1  | 1.6%  |
| 34 | Self-directed violence                                                        | 1  | 0.8%  | 1  | 0.8%  |
| 35 | Self-injurious behavior (including self-poisoning/overdosing with medication) | 7  | 5.6%  | 2  | 2.7%  |
| 36 | An accident                                                                   | 8  | 6.3%  | 4  | 6.2%  |
| 37 | An undetermined death (open verdict)                                          | 40 | 31.7% | 13 | 21.4% |

38  
39 **Vignette 7.** (...) when someone who occasionally thinks of suicide when confronted to distress, this person has

| 43 |                              | N  | %     | N  | %     |
|----|------------------------------|----|-------|----|-------|
| 44 | A normal pattern of thinking | 16 | 12.8% | 8  | 12.8% |
| 45 | Suicidal ideation            | 81 | 64.8% | 40 | 63.0% |
| 46 | Passive suicidal ideation    | 6  | 4.8%  | 4  | 5.7%  |
| 47 | Active suicidal ideation     | 1  | 0.8%  | 0  | 0.1%  |
| 48 | Death wishes                 | 7  | 5.6%  | 5  | 7.8%  |
| 49 | Reactive suicide ideation    | 14 | 11.2% | 6  | 10.2% |
| 50 | Missing                      | 1  |       | 0  |       |

51  
52 **Vignette 8.** (...) when someone who continuously thinks of suicide but has no suicidal intent, this person has

| 55 |                              | N  | %     | N  | %     |
|----|------------------------------|----|-------|----|-------|
| 56 | A normal pattern of thinking | 2  | 1.6%  | 1  | 1.6%  |
| 57 | Suicidal ideation            | 57 | 45.2% | 29 | 46.2% |
| 58 | Passive suicidal ideation    | 12 | 9.5%  | 7  | 11.6% |
| 59 | Active suicidal ideation     | 10 | 7.9%  | 6  | 9.1%  |
| 60 | Persistent suicide ideation  | 39 | 31.0% | 15 | 24.1% |
|    | Death wishes                 | 6  | 4.8%  | 5  | 7.4%  |



**Vignette 9.** (...) when someone who hopes for death but has no thoughts of killing him- or herself, this person has

|                              | N  | %     | N  | %     |
|------------------------------|----|-------|----|-------|
| A normal pattern of thinking | 6  | 4.8%  | 4  | 5.8%  |
| Suicidal ideation            | 18 | 14.4% | 7  | 11.6% |
| Passive suicidal ideation    | 29 | 23.2% | 15 | 23.1% |
| Death wishes                 | 72 | 57.6% | 37 | 59.3% |
| Missing                      | 1  |       | 0  |       |

**Vignette 10.** (...) when someone hopes for death by killing him- or herself, this person has

|                              | N  | %     | N  | %     |
|------------------------------|----|-------|----|-------|
| A normal pattern of thinking | 1  | 0.8%  | 1  | 1.6%  |
| Suicidal ideation            | 77 | 61.6% | 37 | 59.0% |
| Passive suicidal ideation    | 4  | 3.2%  | 2  | 2.5%  |
| Active suicidal ideation     | 40 | 32.0% | 21 | 33.4% |
| Death wishes                 | 3  | 2.4%  | 2  | 3.4%  |
| Missing                      | 1  |       | 0  |       |

**Vignette 11.** (...) when someone states suicidal intention without engaging in behavior, this person

|                                              | N  | %     | N  | %     |
|----------------------------------------------|----|-------|----|-------|
| Is engaging in suicidal behavior             | 4  | 3.3%  | 2  | 2.6%  |
| Is experiencing suicidal ideation            | 70 | 56.9% | 32 | 52.2% |
| Is experiencing passive suicidal ideation    | 7  | 5.7%  | 2  | 3.6%  |
| Is experiencing active suicidal ideation     | 11 | 8.9%  | 6  | 9.9%  |
| Has made a suicide attempt                   | 1  | 0.8%  | 1  | 1.6%  |
| Has made a suicide threat                    | 10 | 8.1%  | 6  | 10.3% |
| Has made a suicide communication             | 14 | 11.4% | 8  | 12.5% |
| Has made a suicide plan                      | 2  | 1.6%  | 1  | 2.0%  |
| Is engaging in preparatory suicidal behavior | 3  | 2.4%  | 2  | 3.6%  |
| Has made an aborted suicide attempt          | 1  | 0.8%  | 1  | 1.6%  |
| Missing                                      | 3  |       | 2  |       |

**Vignette 12.** (...) when someone mimics (i.e. acts in a way that has the appearance of) suicidal behavior without sustaining any injuries, this person

|                                              | N  | %     | N  | %     |
|----------------------------------------------|----|-------|----|-------|
| Is engaging in suicidal behavior             | 42 | 35.6% | 18 | 30.2% |
| Is experiencing suicidal ideation            | 10 | 8.5%  | 3  | 5.7%  |
| Is experiencing passive suicidal ideation    | 4  | 3.4%  | 2  | 2.9%  |
| Is experiencing active suicidal ideation     | 6  | 5.1%  | 5  | 8.6%  |
| Has made a suicide attempt                   | 9  | 7.6%  | 5  | 7.9%  |
| Has made a suicide threat                    | 23 | 19.5% | 15 | 25.8% |
| Has made a suicide communication             | 10 | 8.5%  | 3  | 5.9%  |
| Has made a suicide plan                      | 3  | 2.5%  | 2  | 3.4%  |
| Is engaging in preparatory suicidal behavior | 8  | 6.8%  | 4  | 6.3%  |
| Has made an aborted suicide attempt          | 3  | 2.5%  | 2  | 2.6%  |
| Missing                                      | 8  |       | 5  |       |

**Vignette 13.** (...) when someone has decided how and when to perform a suicidal act, but does not actively prepare anything, this person

|                                           | N  | %    | N | %     |
|-------------------------------------------|----|------|---|-------|
| Is engaging in suicidal behavior          | 7  | 5.7% | 4 | 6.3%  |
| Is experiencing suicidal ideation         | 11 | 8.9% | 4 | 7.2%  |
| Is experiencing passive suicidal ideation | 1  | 0.8% | 0 | 0.1%  |
| Is experiencing active suicidal ideation  | 12 | 9.8% | 6 | 10.6% |
| Has made a suicide threat                 | 2  | 1.6% | 1 | 2.2%  |
| Has made a suicide communication          | 2  | 1.6% | 1 | 2.0%  |

|   |                                              |    |       |    |       |
|---|----------------------------------------------|----|-------|----|-------|
| 1 | Has made a suicide plan                      | 83 | 67.5% | 40 | 65.2% |
| 2 | Is engaging in preparatory suicidal behavior | 4  | 3.3%  | 3  | 4.6%  |
| 3 | Has made an interrupted suicide attempt      | 1  | 0.8%  | 1  | 1.6%  |
| 4 | Missing                                      | 3  |       | 2  |       |

5 **Vignette 14.** (...) when someone prepares a suicidal act (e.g. assembles pills, buys a gun,  
6 attaches a rope, visits a bridge), but does not initiate it and thus does not sustain any injuries,  
7 this person

| 8  |                                              | N  | %     | N  | %     |
|----|----------------------------------------------|----|-------|----|-------|
| 9  | Is engaging in suicidal behavior             | 8  | 6.6%  | 4  | 6.1%  |
| 10 | Is experiencing suicidal ideation            | 5  | 4.1%  | 3  | 4.7%  |
| 11 | Is experiencing active suicidal ideation     | 7  | 5.7%  | 4  | 5.8%  |
| 12 | Has made a suicide attempt                   | 3  | 2.5%  | 3  | 5.0%  |
| 13 | Has made a suicide threat                    | 3  | 2.5%  | 2  | 3.3%  |
| 14 | Has made a suicide communication             | 1  | 0.8%  | 1  | 0.8%  |
| 15 | Has made a suicide plan                      | 42 | 34.4% | 20 | 33.8% |
| 16 | Is engaging in preparatory suicidal behavior | 52 | 42.6% | 24 | 39.8% |
| 17 | Has made an interrupted suicide attempt      | 1  | 0.8%  | 1  | 0.8%  |
| 18 | Missing                                      | 4  |       | 3  |       |

19 **Vignette 15.** (...) when someone initiates a suicidal act (e.g. stands or sits on the edge of a high  
20 bridge, ties a rope around his or her neck), but stops him or herself before sustaining any  
21 injuries, this person

| 22 |                                              | N  | %     | N  | %     |
|----|----------------------------------------------|----|-------|----|-------|
| 23 | Is engaging in suicidal behavior             | 17 | 14.0% | 6  | 9.9%  |
| 24 | Is experiencing suicidal ideation            | 1  | 0.8%  | 0  | 0.6%  |
| 25 | Is experiencing active suicidal ideation     | 2  | 1.7%  | 2  | 3.3%  |
| 26 | Has made a suicide attempt                   | 23 | 19.0% | 16 | 26.2% |
| 27 | Has made a suicide threat                    | 6  | 5.0%  | 3  | 5.1%  |
| 28 | Has made a suicide communication             | 1  | 0.8%  | 0  | 0.4%  |
| 29 | Has made a suicide plan                      | 2  | 1.7%  | 2  | 3.3%  |
| 30 | Is engaging in preparatory suicidal behavior | 8  | 6.6%  | 3  | 5.7%  |
| 31 | Has made an interrupted suicide attempt      | 21 | 17.4% | 10 | 16.0% |
| 32 | Has made an aborted suicide attempt          | 40 | 33.1% | 18 | 29.7% |
| 33 | Missing                                      | 5  |       | 3  |       |

34 **Vignette 16.** (...) when someone initiates a suicidal act (e.g. stands or sits on the edge of a high  
35 bridge, ties a rope around his or her neck), but is stopped by someone else before sustaining any  
36 injuries, this person

| 37 |                                          | N  | %     | N  | %     |
|----|------------------------------------------|----|-------|----|-------|
| 38 | Is engaging in suicidal behavior         | 7  | 5.8%  | 4  | 6.4%  |
| 39 | Is experiencing suicidal ideation        | 1  | 0.8%  | 0  | 0.6%  |
| 40 | Is experiencing active suicidal ideation | 1  | 0.8%  | 1  | 1.7%  |
| 41 | Has made a suicide attempt               | 33 | 27.3% | 19 | 32.2% |
| 42 | Has made a suicide communication         | 1  | 0.8%  | 1  | 1.7%  |
| 43 | Has made a suicide plan                  | 1  | 0.8%  | 0  | 0.4%  |
| 44 | Has made an interrupted suicide attempt  | 71 | 58.7% | 31 | 51.2% |
| 45 | Has made an aborted suicide attempt      | 6  | 5.0%  | 4  | 6.1%  |
| 46 | Missing                                  | 5  |       | 3  |       |

47 \*sensitivity analyses (calculated using weights)

Supplementary Figure 2. Percentage of respondents who agreed with statements regarding the definition of suicide according to national income in the ISDELTSB sample (HIC=High Income Country; LMIC=Low- and Middle-Income Country)

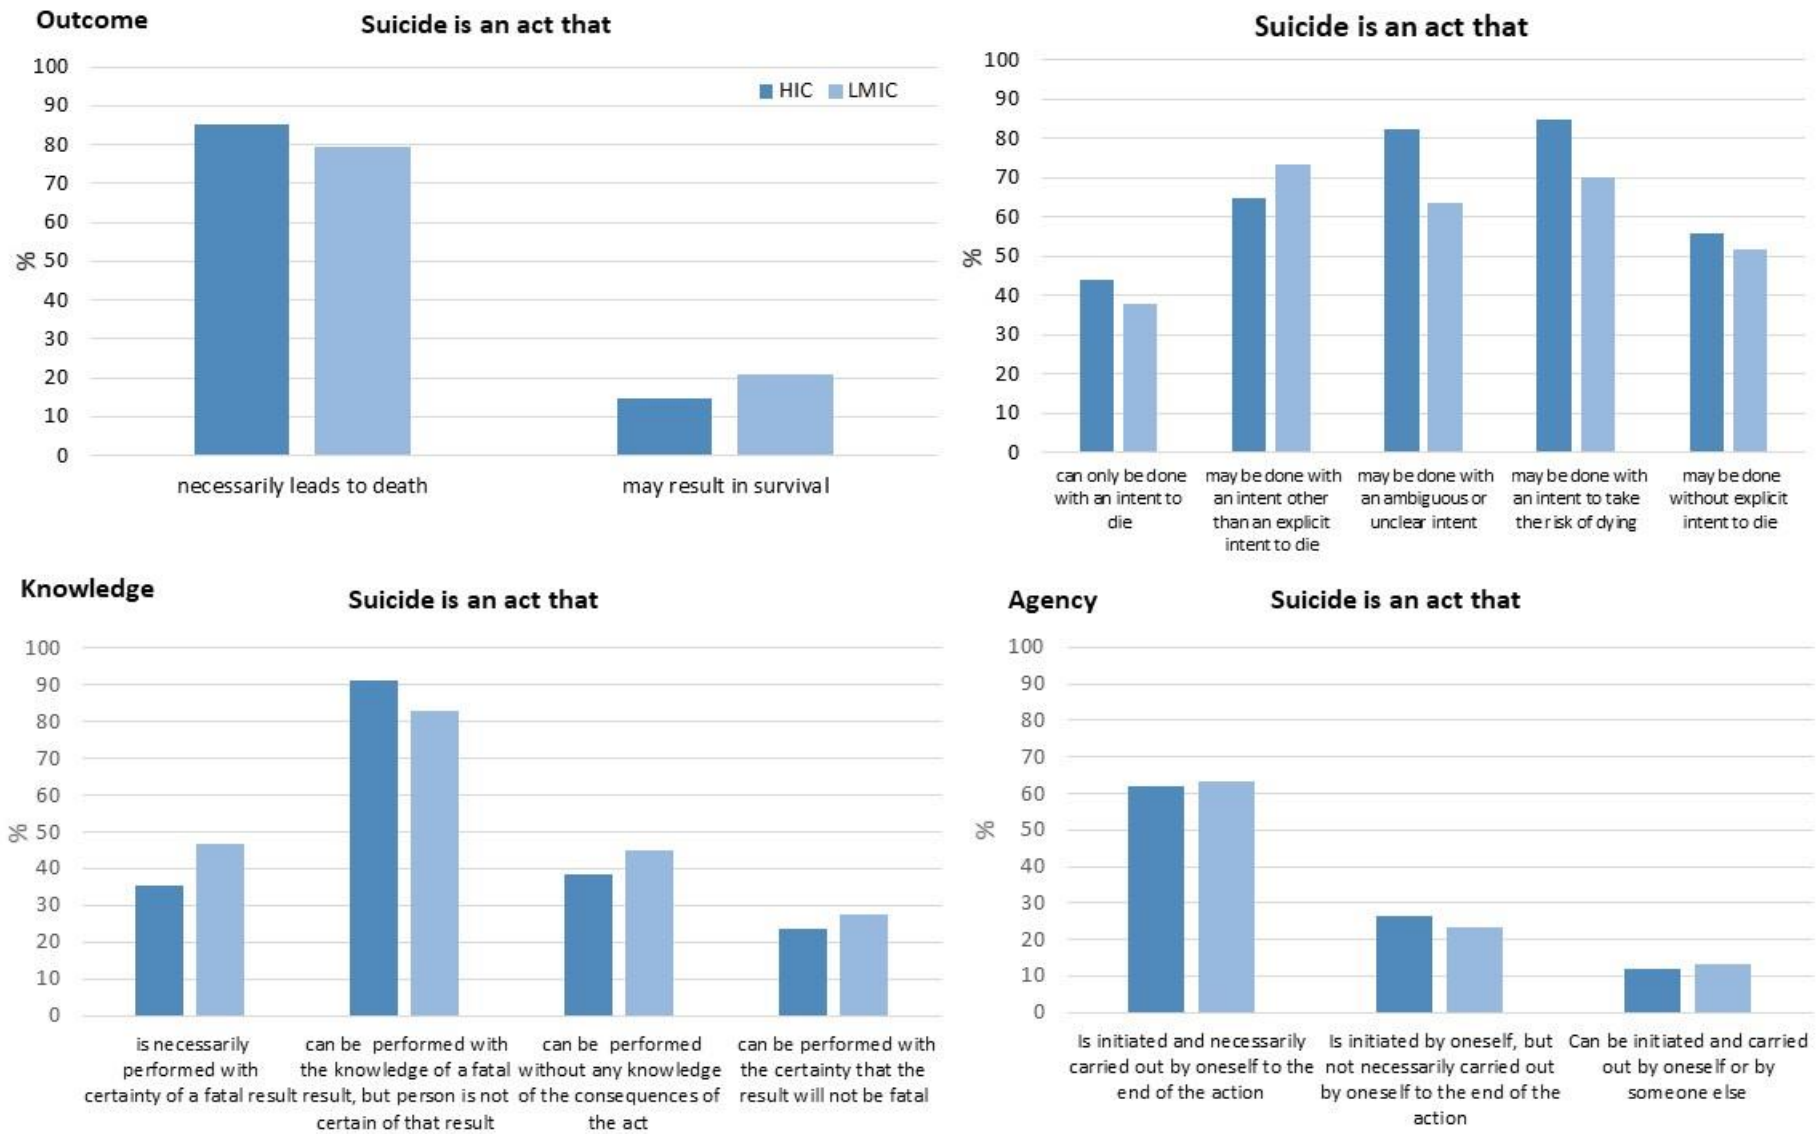

Supplementary Figure 3. Percentage of respondents agreeing to statements regarding the definition of suicidal behaviours (Vignettes 1-8) by national income in ISDTSB sample (HIC=High Income Country; LMIC=Low- and Middle-Income Country)

**Vignette 1** (...) when a person harms him- or herself, with the intention to die, and survives, his or her act is

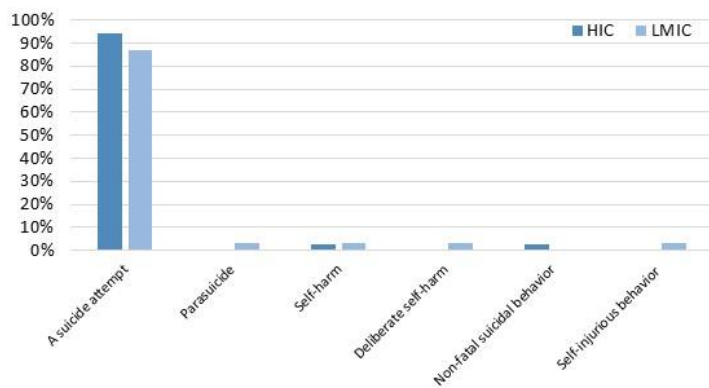

**Vignette 2** (...) when a person harms him- or herself without any intention to die, and survives, his or her act is

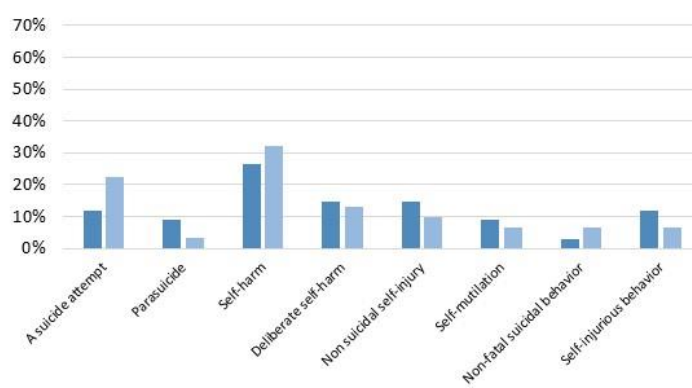

**Vignette 3** (...) when a person harms him- or herself without any intention to die, and dies, his or her act is

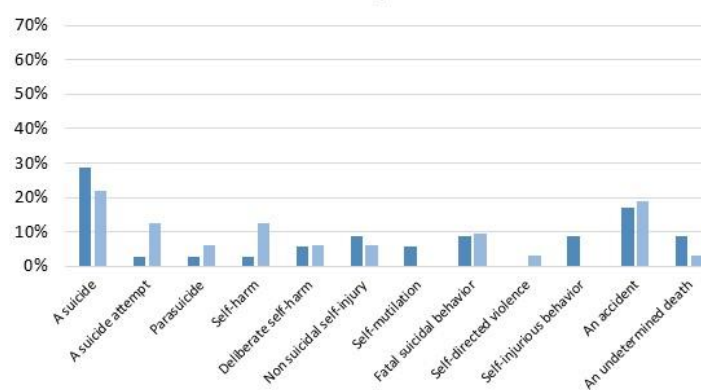

**Vignette 4** (...) when a person harms him- or herself, but, for whatever reasons, cannot state his or her intentions and the person survives, his or her act is

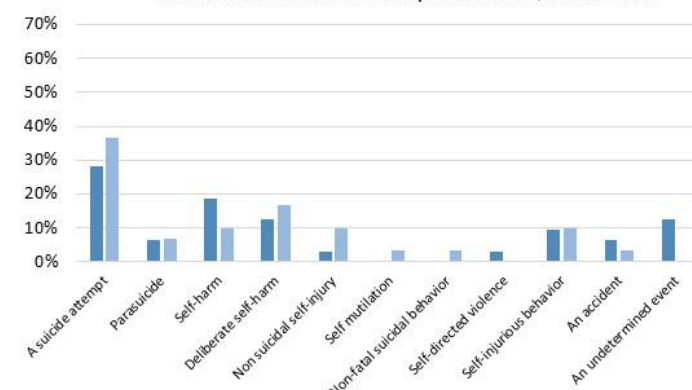

**Vignette 5** (...) when a person harms him- or herself, but does not want to state his or her intentions and the person survives, his or her act is

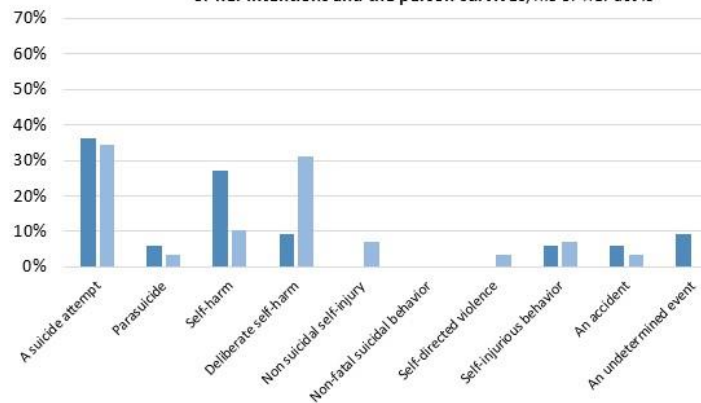

**Vignette 6** (...) when a person dies as a consequence of harming him or herself, but his or her intentions in doing so cannot be known or inferred, his or her act is

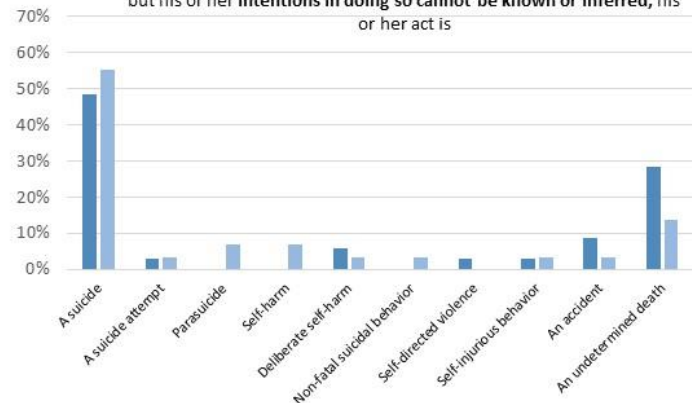

**Vignette 7** (...) when someone who occasionally thinks of suicide when confronted to distress, this person has

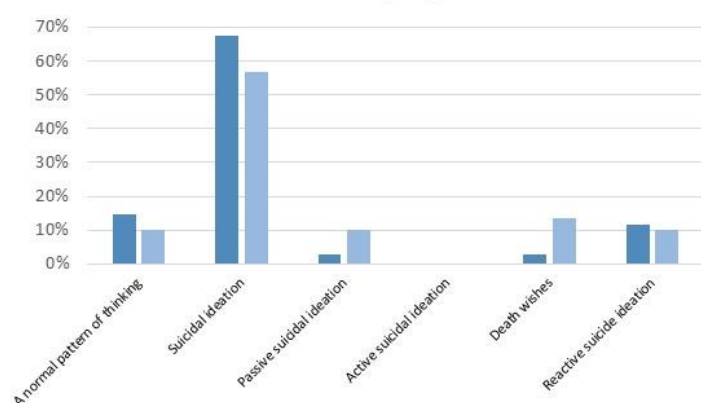

**Vignette 8** (...) when someone who continuously thinks of suicide but has no suicidal intent, this person has

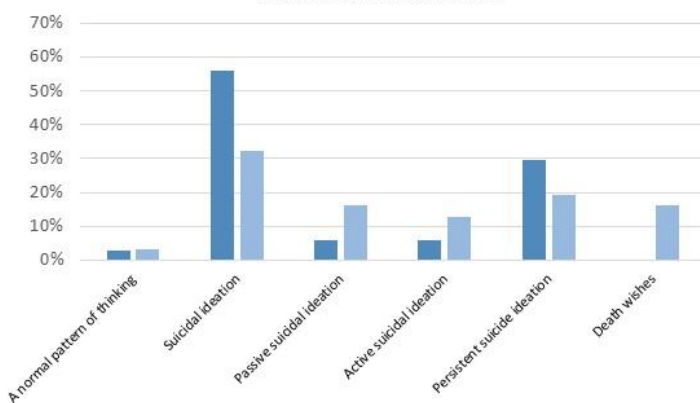

Supplementary Figure 4. Percentage of respondents agreeing to statements regarding the definition of suicidal behaviours (Vignettes 9-16) by national income in ISDTSB sample (HIC=High Income Country; LMIC=Low- and Middle-Income Country)

**Vignette 9** (...) when someone who **hopes for death** but has no thoughts of killing him- or herself, this person has

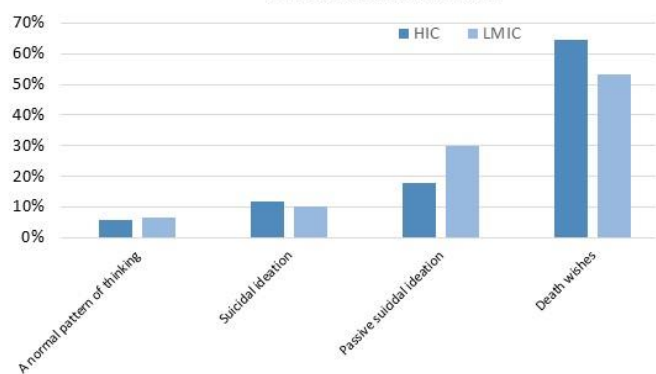

**Vignette 10** (...) when someone **hopes for death by killing him- or herself**, this person has

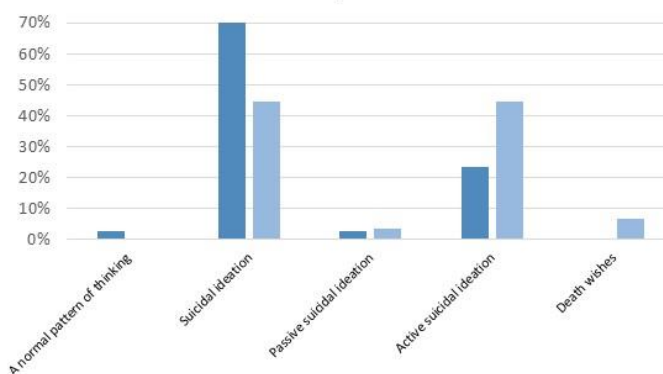

**Vignette 11** (...) when someone **states suicidal intention without engaging in behavior**, this person

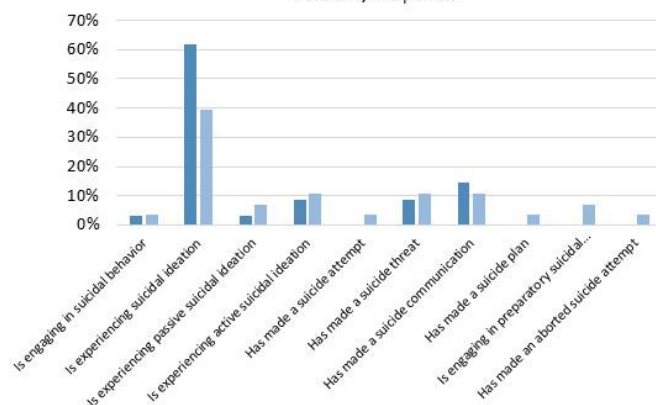

**Vignette 12** (...) when someone **mimics (i.e. acts in a way that has the appearance of) suicidal behavior without sustaining any injuries**, this person

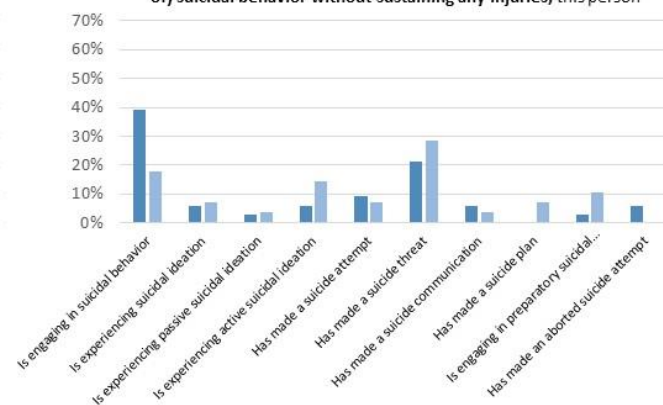

**Vignette 13** (...) when someone **has decided how and when to perform a suicidal act, but does not actively prepare anything**, this person

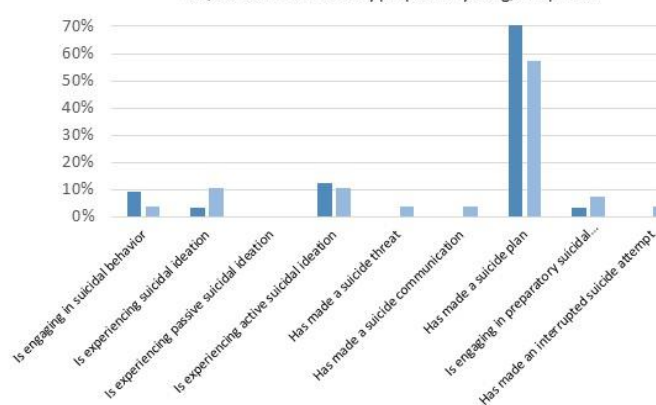

**Vignette 14** (...) when someone **prepares a suicidal act (e.g. assembles pills, buys a gun, attaches a rope, visits a bridge), but does not initiate it and thus does not sustain any injuries**, this person

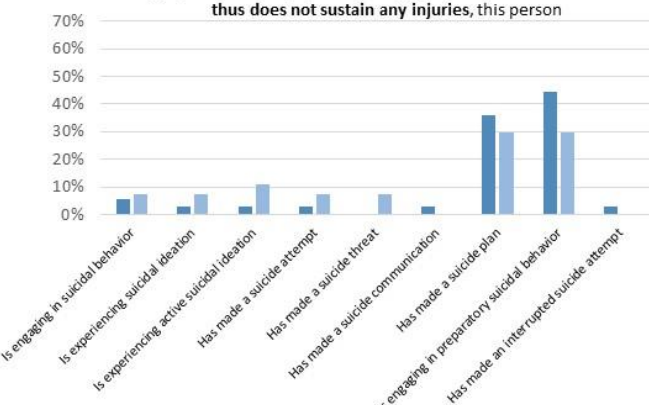

**Vignette 15** (...) when someone **initiates a suicidal act (e.g. stands or sits on the edge of a high bridge, ties a rope around his or her neck), but stops him or herself before sustaining any injuries**, this person

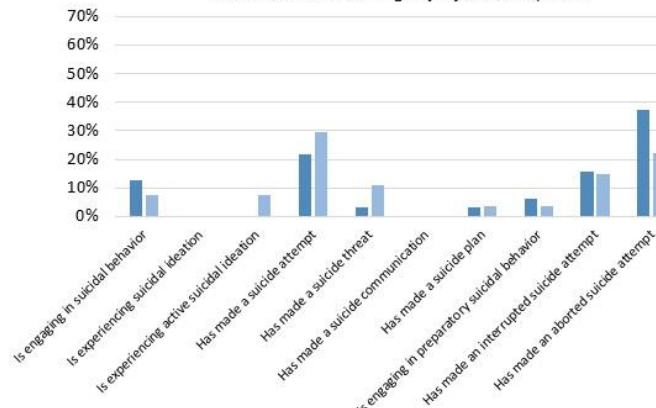

**Vignette 16** (...) when someone **initiates a suicidal act (e.g. stands or sits on the edge of a high bridge, ties a rope around his or her neck), but is stopped by someone else before sustaining any injuries**, this person

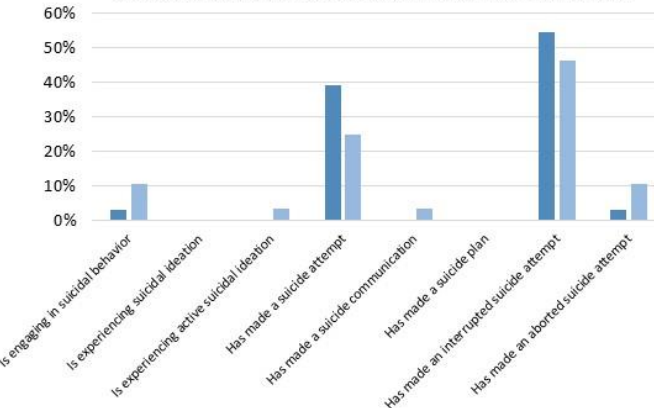

## STROBE Statement

|                           | Item No. | Recommendation                                                                                                                                                                                    | Page No. |
|---------------------------|----------|---------------------------------------------------------------------------------------------------------------------------------------------------------------------------------------------------|----------|
| <b>Title and abstract</b> | 1        | (a) Indicate the study's design with a commonly used term in the title or the abstract                                                                                                            | 2        |
|                           |          | (b) Provide in the abstract an informative and balanced summary of what was done and what was found                                                                                               | 2        |
| <b>Introduction</b>       |          |                                                                                                                                                                                                   |          |
| Background/rationale      | 2        | Explain the scientific background and rationale for the investigation being reported                                                                                                              | 4        |
| Objectives                | 3        | State specific objectives, including any prespecified hypotheses                                                                                                                                  | 4        |
| <b>Method</b>             |          |                                                                                                                                                                                                   |          |
| Study design              | 4        | Present key elements of study design early in the paper                                                                                                                                           | 5        |
| Setting                   | 5        | Describe the setting, locations, and relevant dates, including periods of recruitment, exposure, follow-up, and data collection                                                                   | 5-6      |
| Participants              | 6        | (a) <i>Cohort study</i> —Give the eligibility criteria, and the sources and methods of selection of participants. Describe methods of follow-up                                                   |          |
|                           |          | <i>Case-control study</i> —Give the eligibility criteria, and the sources and methods of case ascertainment and control selection. Give the rationale for the choice of cases and controls        |          |
|                           |          | <i>Cross-sectional study</i> —Give the eligibility criteria, and the sources and methods of selection of participants                                                                             | 5-6      |
| Variables                 | 7        | Clearly define all outcomes, exposures, predictors, potential confounders, and effect modifiers. Give diagnostic criteria, if applicable                                                          | 5-6      |
| Data sources/measurement  | 8*       | For each variable of interest, give sources of data and details of methods of assessment (measurement). Describe comparability of assessment methods if there is more than one group              | 5        |
| Bias                      | 9        | Describe any efforts to address potential sources of bias                                                                                                                                         | 5-6      |
| Study size                | 10       | Explain how the study size was arrived at                                                                                                                                                         | 6        |
| Quantitative variables    | 11       | Explain how quantitative variables were handled in the analyses. If applicable, describe which groupings were chosen and why                                                                      | 6        |
| Statistical methods       | 12       | (a) Describe all statistical methods, including those used to control for confounding                                                                                                             | 6        |
|                           |          | (b) Describe any methods used to examine subgroups and interactions                                                                                                                               | 6        |
|                           |          | (c) Explain how missing data were addressed                                                                                                                                                       | 6        |
|                           |          | (d) <i>Cohort study</i> —If applicable, explain how loss to follow-up was addressed                                                                                                               | NA       |
|                           |          | <i>Case-control study</i> —If applicable, explain how matching of cases and controls was addressed                                                                                                |          |
|                           |          | <i>Cross-sectional study</i> —If applicable, describe analytical methods taking account of sampling strategy                                                                                      |          |
|                           |          | (e) Describe any sensitivity analyses                                                                                                                                                             | NA       |
| Participants              | 13*      | (a) Report numbers of individuals at each stage of study—eg numbers potentially eligible, examined for eligibility, confirmed eligible, included in the study, completing follow-up, and analysed | 5        |

|                          |     |                                                                                                                                                                                                              |       |
|--------------------------|-----|--------------------------------------------------------------------------------------------------------------------------------------------------------------------------------------------------------------|-------|
|                          |     | (b) Give reasons for non-participation at each stage                                                                                                                                                         | NA    |
|                          |     | (c) Consider use of a flow diagram                                                                                                                                                                           | NA    |
| Descriptive data         | 14* | (a) Give characteristics of study participants (eg demographic, clinical, social) and information on exposures and potential confounders                                                                     | 5-6   |
|                          |     | (b) Indicate number of participants with missing data for each variable of interest                                                                                                                          | 6-10  |
|                          |     | © <i>Cohort study</i> —Summarise follow-up time (eg, average and total amount)                                                                                                                               | NA    |
| Outcome data             | 15* | <i>Cohort study</i> —Report numbers of outcome events or summary measures over time                                                                                                                          |       |
|                          |     | <i>Case-control study</i> —Report numbers in each exposure category, or summary measures of exposure                                                                                                         |       |
|                          |     | <i>Cross-sectional study</i> —Report numbers of outcome events or summary measures                                                                                                                           | 6-10  |
| Main results             | 16  | (a) Give unadjusted estimates and, if applicable, confounder-adjusted estimates and their precision (eg, 95% confidence interval). Make clear which confounders were adjusted for and why they were included | 6-10  |
|                          |     | (b) Report category boundaries when continuous variables were categorized                                                                                                                                    | 6-10  |
|                          |     | © If relevant, consider translating estimates of relative risk into absolute risk for a meaningful time period                                                                                               | NA    |
| Other analyses           | 17  | Report other analyses done—eg analyses of subgroups and interactions, and sensitivity analyses                                                                                                               | 6-10  |
| Key results              | 18  | Summarise key results with reference to study objectives                                                                                                                                                     | 10-12 |
| Limitations              | 19  | Discuss limitations of the study, taking into account sources of potential bias or imprecision. Discuss both direction and magnitude of any potential bias                                                   | 14-15 |
| Interpretation           | 20  | Give a cautious overall interpretation of results considering objectives, limitations, multiplicity of analyses, results from similar studies, and other relevant evidence                                   | 16    |
| Generalisability         | 21  | Discuss the generalisability (external validity) of the study results                                                                                                                                        | 15-16 |
| <b>Other information</b> |     |                                                                                                                                                                                                              |       |
| Funding                  | 22  | Give the source of funding and the role of the funders for the present study and, if applicable, for the original study on which the present article is based                                                | 18    |

\*Give information separately for cases and controls in case-control studies and, if applicable, for exposed and unexposed groups in cohort and cross-sectional studies.

**Note:** An Explanation and Elaboration article discusses each checklist item and gives methodological background and published examples of transparent reporting. The STROBE checklist is best used in conjunction with this article (freely available on the Web sites of PLoS Medicine at <http://www.plosmedicine.org/>, Annals of Internal Medicine at <http://www.annals.org/>, and Epidemiology at <http://www.epidem.com/>). Information on the STROBE Initiative is available at [www.strobe-statement.org](http://www.strobe-statement.org).
